# Supplementary material for: Frazzled promotes growth cone attachment at the source of a Netrin gradient in the Drosophila visual system
Source: eLife. 2016 Oct 15;5:e20762. doi: 10.7554/eLife.20762 (PMC5108592; doi:10.7554/eLife.20762)
Supplement: Figure 1—figure supplement 1—source data 1. — DOI: http://dx.doi.org/10.7554/eLife.20762.006 [file elife-20762-fig1-figsupp1-data1.xls]

## Sheet: Fig.1-FS1b
	Roll Average (Degree)			Roll Std (Degree)
Time (hAPF)	X	Y	Z	X	Y	Z
36	23.778	-0.41403	-0.57205	3.5562	2.3116	2.8337
36.5	21.525	-0.9107	-0.64284	3.6774	2.3118	2.6395
37	20.554	-0.26779	-1.2311	3.4555	2.6112	3.1635
37.5	18.298	0.071442	-1.4245	2.8213	2.2745	2.8939
38	16.603	-1.3845	-0.36961	2.0006	2.3112	2.4258
38.5	15.071	-1.5887	-0.69821	1.7718	2.2161	1.8599
39	12.895	-1.5012	-0.53228	1.675	2.0165	1.4879
39.5	11.912	-1.6351	-0.23105	1.4863	1.7898	1.4819
40	10.513	-1.5248	0.025662	1.4787	1.7048	1.4837
40.5	8.9271	-1.5416	-0.10998	1.3369	1.5243	1.4393
41	7.4819	-1.4207	-0.030224	1.3124	1.4574	1.4327
41.5	6.2779	-1.4016	0.44304	1.3444	1.3269	0.83367
42	5.4181	-1.3116	0.57653	0.92948	1.18	0.65569
42.5	4.8531	-1.4596	0.46682	0.98756	0.74724	0.67881
43	4.3906	-1.4831	0.43604	0.82743	0.64272	0.633
43.5	3.7328	-1.4894	0.16817	0.66501	0.68877	0.38216
44	3.5112	-1.0846	0.15702	0.49955	0.35205	0.5409
44.5	3.1519	-0.97896	0.099437	0.41213	0.39844	0.42975
45	2.8282	-0.61791	0.0471	0.37943	0.34864	0.40438
45.5	2.39	-0.25673	0.01955	0.57908	0.288	0.3911
46	1.5531	-0.034911	-0.099916	0.52232	0.27191	0.33104
46.5	1.1953	-0.17699	-0.0031919	0.45188	0.45521	0.29134
47	0.51175	-0.13377	-0.038298	0.27848	0.29219	0.28516
47.5	0.21156	-0.1034	-0.088262	0.29714	0.18013	0.22228
48	0	0	0	0	0	0
48.5	-0.1898	-0.0064668	-0.10417	0.43216	0.22078	0.22962
49	-0.30146	0.044317	-0.24382	0.28686	0.16674	0.21043
49.5	-0.28224	0.29129	-0.22381	0.70624	0.35371	0.30729
50	-0.19991	0.24654	-0.18854	0.5626	0.30849	0.32999
50.5	-0.39069	0.64017	-0.14398	0.59165	0.8395	0.55674
51	0.0088775	0.37309	-0.26522	0.73846	0.43182	0.57144
51.5	-0.37458	0.3294	-0.48544	1.0386	0.67395	0.58931
52	-0.51743	0.30696	-0.51864	1.1359	0.80163	0.55335
52.5	-0.27355	0.30781	-0.27526	1.0474	0.69476	0.72074
53	-0.23026	-0.21208	-0.32403	1.0361	0.81804	0.58463
53.5	-0.48913	0.21226	-0.61395	0.60309	1.1597	0.89024
54	-0.89954	0.16624	-0.53634	0.66803	1.1648	0.91455
54.5	-0.46487	-0.51138	-0.76981	0.93875	1.5066	0.84303
55	-0.46312	-0.18328	-0.46488	0.91554	1.6534	0.98789
55.5	-1.1953	-0.15068	-0.64224	0.78144	1.2324	0.66356
56	-1.0415	-0.13199	-0.5574	1.0692	1.44	0.85544
56.5	-0.8972	-0.35776	-0.23121	0.67442	1.3017	1.1651
57	-0.98663	-0.21754	-0.12811	0.84754	1.008	1.2736
57.5	-1.4208	-0.52164	-0.17535	0.75507	1.5451	1.2372
58	-1.486	-0.41047	-0.016152	0.94559	1.6039	1.0307
58.5	-1.4838	-0.3552	-0.14442	0.87121	1.1818	0.94935
59	-1.79	-0.23883	-0.17592	0.83386	1.1321	1.087
59.5	-1.8828	-0.28064	0.077796	1.1497	1.2275	0.79452
60	-1.7056	-0.027049	-0.0065143	0.91799	0.73802	0.73563
