# Supplementary material for: Frazzled promotes growth cone attachment at the source of a Netrin gradient in the Drosophila visual system
Source: eLife. 2016 Oct 15;5:e20762. doi: 10.7554/eLife.20762 (PMC5108592; doi:10.7554/eLife.20762)
Supplement: Figure 1—source data 1. — DOI: http://dx.doi.org/10.7554/eLife.20762.004 [file elife-20762-fig1-data1.xls]

## Sheet: Fig.1b
Distance (um)	Fluorescence Intensity, Raw (A.U.)	Fluorescence Intensity, Plotted (A.U.)
-5.88	2358	2.358
-5.6	4996.1	4.9961
-5.32	7067	7.067
-5.04	4470.2	4.4702
-4.76	5454.9	5.4549
-4.48	5196.8	5.1968
-4.2	4658.6	4.6586
-3.92	1976.8	1.9768
-3.64	3794.9	3.7949
-3.36	4679.5	4.6795
-3.08	3574.5	3.5745
-2.8	5078	5.078
-2.52	6115.1	6.1151
-2.24	8935.5	8.9355
-1.96	3039.7	3.0397
-1.68	5015	5.015
-1.4	3947.8	3.9478
-1.12	5327.4	5.3274
-0.84	6381.6	6.3816
-0.56	4214.9	4.2149
-0.28	3870.6	3.8706
0	3048.2	3.0482
0.28	3887.6	3.8876
0.56	4828.6	4.8286
0.84	7025.8	7.0258
1.12	8114.6	8.1146
1.4	8775.9	8.7759
1.68	10981	10.981
1.96	12539	12.539
2.24	9004.7	9.0047
2.52	9121.9	9.1219
2.8	13844	13.844
3.08	12067	12.067
3.36	8294.9	8.2949
3.64	8752.7	8.7527
3.92	8189.4	8.1894
4.2	13432	13.432
4.48	15626	15.626
4.76	12877	12.877
5.04	13765	13.765
5.32	13452	13.452
5.6	11070	11.07
5.88	13654	13.654
6.16	15799	15.799
6.44	14451	14.451
6.72	13386	13.386
7	13561	13.561
7.28	15200	15.2
7.56	15529	15.529
7.84	13238	13.238
8.12	15164	15.164
8.4	15763	15.763
8.68	20019	20.019
8.96	27074	27.074
9.24	29308	29.308
9.52	26311	26.311
9.8	32733	32.733
10.08	43633	43.633
10.36	41311	41.311
10.64	40919	40.919
10.92	43262	43.262
11.2	46702	46.702
11.48	50989	50.989
11.76	47959	47.959
12.04	39323	39.323
12.32	31065	31.065
12.6	32173	32.173
12.88	27288	27.288
13.16	17604	17.604
13.44	13924	13.924
13.72	11599	11.599
14	11767	11.767
14.28	13259	13.259
14.56	11268	11.268
14.84	8886.3	8.8863
15.12	9058.6	9.0586
15.4	9059.4	9.0594
15.68	8578	8.578
15.96	8050.8	8.0508
16.24	6734.4	6.7344
16.52	6864.3	6.8643
16.8	8202.3	8.2023
17.08	7517.6	7.5176
17.36	7144.4	7.1444
17.64	8903.9	8.9039
17.92	10559	10.559
18.2	10673	10.673
18.48	11031	11.031
18.76	8825.9	8.8259
19.04	6458.5	6.4585
19.32	5951.9	5.9519
19.6	5575	5.575
19.88	5100.5	5.1005
20.16	7926.9	7.9269
20.44	8485.4	8.4854
20.72	6685.1	6.6851
21	6071.1	6.0711
21.28	4684.7	4.6847
21.56	5176.6	5.1766
21.84	5723.5	5.7235
