# Supplementary material for: Frazzled promotes growth cone attachment at the source of a Netrin gradient in the Drosophila visual system
Source: eLife. 2016 Oct 15;5:e20762. doi: 10.7554/eLife.20762 (PMC5108592; doi:10.7554/eLife.20762)
Supplement: Figure 2—source data 1. — DOI: http://dx.doi.org/10.7554/eLife.20762.009 [file elife-20762-fig2-data1.xls]

## Sheet: Fig.2b
Time (hAPF)	Depth (um)	Std (um)
41	3.1364	1.7383
41.5	3.5553	2.0531
42	3.9924	2.4379
42.5	4.4015	2.7422
43	4.832	2.9293
43.5	5.0633	2.8552
44	5.9202	3.1065
44.5	6.7813	3.0788
45	6.9673	3.3344
45.5	8.0747	3.2358
46	9.1329	3.1572
46.5	10.052	2.6324
47	10.549	2.2978
47.5	10.979	2.1218
48	11.311	1.5357
48.5	11.487	1.6051
49	11.682	1.2796
49.5	11.818	1.1794
50	11.941	1.0904
50.5	12.061	1.0354
51	12.191	1.0932
51.5	12.277	1.1413
52	12.344	1.1697
52.5	12.523	1.1843
53	12.587	1.2005
53.5	12.639	1.1446
54	12.817	1.2032
54.5	12.927	1.2886
55	12.985	1.282
55.5	13.087	1.2775
56	13.166	1.3903
56.5	13.239	1.3838
57	13.341	1.42
57.5	13.48	1.3163
58	13.528	1.5272
58.5	13.556	1.5497
59	13.566	1.5914

## Sheet: Fig.2c
Parent Plot			Inset Plot
Step Size (um), Bin Center	Steps (#)		Step Size (um), Bin Center	Steps (#)
-15	0		-15	0
-14	0		-14	0
-13	0		-13	0
-12	0		-12	0
-11	0		-11	0
-10	0		-10	0
-9	2		-9	2
-8	4		-8	4
-7	5		-7	5
-6	21		-6	21
-5	0		-5	40
-4	0		-4	148
-3	0		-3	387
-2	0		-2	1066
-1	0		-1	2388
0	0		0	2324
1	0		1	1203
2	0		2	484
3	0		3	212
4	0		4	109
5	43		5	43
6	23		6	23
7	16		7	16
8	1		8	1
9	3		9	3
10	0		10	0
11	0		11	0
12	0		12	0
13	0		13	0
14	0		14	0
15	0		15	0

## Sheet: Fig.2d
Time (hAPF), Bin Center	Growth Cones (#)
41	0
41.5	0
42	0
42.5	0
43	1
43.5	0
44	2
44.5	8
45	15
45.5	42
46	51
46.5	34
47	27
47.5	24
48	11
48.5	6
49	4
49.5	4
50	0
