# Supplementary material for: Frazzled promotes growth cone attachment at the source of a Netrin gradient in the Drosophila visual system
Source: eLife. 2016 Oct 15;5:e20762. doi: 10.7554/eLife.20762 (PMC5108592; doi:10.7554/eLife.20762)
Supplement: Figure 3—figure supplement 1—source data 1. — DOI: http://dx.doi.org/10.7554/eLife.20762.014 [file elife-20762-fig3-figsupp1-data1.xls]

## Sheet: Fig.3-FS1a
Left Panel									Right Panel
Parent Plot						Inset Plot			Parent Plot						Inset Plot
	R8	R8	Dm3	Dm3						R8	R8	Dm3	Dm3
Time (hAPF)	Depth (um)	Std (um)	Depth (um)	Std (um)		Time (hAPF)	Ratio		Time (hAPF)	Depth (um)	Std (um)	Depth (um)	Std (um)		Time (hAPF)	Ratio
35.84	2.3386	1.0009	5.3784	0.82602		35.84	2.1261		36.01	2.549	1.1756	5.2067	1.2571		36.01	2.054
36.33	2.5461	1.0607	5.573	0.66637		36.33	2.0175		36.5	2.3447	1.1786	5.0145	1.2966		36.5	2.1103
37.81	2.479	1.3186	6.0173	0.7032		37.81	2.3438		37.97	2.26	1.0865	5.24	1.0854		37.97	2.2074
38.3	2.5741	1.2868	6.2389	0.61373		38.3	2.3089		38.47	2.3575	1.4236	5.206	1.1826		38.47	2.3318
38.79	2.427	1.1557	6.2299	0.58844		38.79	2.3432		38.96	2.4679	1.5534	5.8594	1.0558		38.96	3.0828
39.29	2.4345	1.1178	6.2967	0.5751		39.29	2.3559		39.45	2.5181	1.4782	5.73	0.96043		39.45	2.4924
39.78	2.4817	1.5525	6.6548	0.58044		39.78	2.6191		39.95	2.4765	1.317	6.1116	0.93926		39.95	2.4949
40.28	2.6585	1.6352	6.5591	0.63427		40.28	2.4806		40.44	2.583	1.5428	6.2951	0.9097		40.44	2.5235
40.77	2.8062	1.997	6.7238	0.65738		40.77	2.5229		40.94	2.8536	1.8236	6.3492	0.80155		40.94	2.3322
41.26	3.1821	2.3083	6.774	0.66045		41.26	2.3969		41.43	2.7671	2.0417	6.6606	0.84847		41.43	2.4973
41.76	3.4905	2.2732	6.8849	0.72962		41.76	2.2975		41.92	3.16	2.0671	6.4583	0.95746		41.92	2.2617
42.25	4.1283	2.9001	7.1151	0.74232		42.25	2.2705		42.42	4.1026	2.8648	6.6955	1.0301		42.42	2.0461
42.75	4.6682	3.2573	7.3814	0.76326		42.75	2.0167		42.91	4.0146	2.952	6.926	0.90976		42.91	2.1804
43.24	5.8974	3.9454	7.3181	0.77647		43.24	1.6746		43.4	5.3915	3.2885	7.0528	0.6944		43.4	1.8346
43.73	6.9115	3.7122	7.2779	0.81777		43.73	1.432		43.9	5.7318	3.1894	6.9316	0.78844		43.9	1.5567
44.23	7.8059	3.9241	7.716	0.80212		44.23	1.3042		44.39	6.6686	3.5647	7.4329	1.0267		44.39	1.4968
44.72	9.6051	3.5704	7.6134	0.88003		44.72	1.0138		44.88	7.8599	4.0351	7.4949	0.84662		44.88	1.4091
45.21	10.928	3.2112	7.4658	0.95857		45.21	0.79424		45.38	9.611	3.6568	7.3886	0.96313		45.38	0.98597
45.71	11.598	3.1651	7.8109	0.98583		45.71	0.78817		45.87	10.947	3.7785	7.4753	0.9905		45.87	0.91626
46.2	12.428	2.7521	7.6547	0.91222		46.2	0.71041		46.36	11.821	3.3184	7.5345	0.94625		46.36	0.80045
46.69	13.027	2.3207	7.9094	0.99882		46.69	0.66841		46.86	12.241	2.9204	7.5536	0.97505		46.86	0.75914
47.19	13.695	2.0258	7.7217	0.97077		47.19	0.61672		47.35	12.94	2.4058	7.4445	0.98734		47.35	0.63407
47.68	13.668	1.4768	7.9471	0.96669		47.68	0.61498		47.85	12.862	2.6042	8.5423	0.80216		47.85	0.7297
48.18	14.051	1.479	7.9694	0.99854		48.18	0.60037		48.34	13.153	1.9421	8.2685	0.85566		48.34	0.67285
48.67	14.163	1.4848	7.9796	1.0047		48.67	0.59624		48.83	13.594	2.2525	7.6627	1.0141		48.83	0.61297
49.17	14.413	1.5433	7.991	0.97144		49.17	0.58667		49.34	13.817	1.7552	7.6338	0.91798		49.34	0.58862
49.67	14.546	1.3351	8.1067	1.0117		49.67	0.58797		49.84	13.859	1.6944	7.7827	0.94501		49.84	0.59647
50.17	14.423	1.2815	8.1534	1.0231		50.17	0.59566		50.34	13.818	1.8336	7.9462	1.0304		50.34	0.60861
50.67	14.48	1.2378	7.9415	1.0198		50.67	0.57888		50.84	13.818	1.5544	8.8471	0.86789		50.84	0.66908
51.17	14.512	1.0887	8.2575	1.0433		51.17	0.59816		51.34	14.141	1.6919	8.9605	1.0469		51.34	0.66259
51.67	14.682	1.3105	8.4447	1.0293		51.67	0.6041		51.84	14.191	1.6271	8.1987	1.0352		51.84	0.60883
52.17	14.739	1.1924	8.2743	1.0995		52.17	0.59047		52.34	14.215	1.5674	7.9346	1.125		52.34	0.58878
52.67	15.16	1.2557	8.671	1.0025		52.67	0.60045		52.84	14.385	1.7002	7.9894	1.0521		52.84	0.58672
53.18	15.08	1.2134	8.6098	1.0578		53.18	0.59875		53.34	14.546	1.7572	8.0815	1.1635		53.34	0.58672
53.68	15.263	1.3921	8.6637	1.0661		53.68	0.59659		53.84	14.795	1.7665	7.9086	1.2389		53.84	0.56514
54.18	15.445	1.3575	8.7962	1.0953		54.18	0.597		54.35	14.962	1.8137	9.4254	1.0981		54.35	0.65698
54.68	15.483	1.3196	8.6697	1.114		54.68	0.58814		54.85	14.824	1.9203	9.2937	1.2803		54.85	0.65338
55.18	15.719	1.2172	8.5689	1.1746		55.18	0.57296		55.35	15.356	1.6774	9.5013	1.0766		55.35	0.64541
55.69	15.898	1.2994	8.604	1.2414		55.69	0.56972		55.85	15.362	1.6724	9.4807	1.1733		55.85	0.64227
56.19	16.04	1.3437	8.5386	1.2341		56.19	0.56106		56.36	15.428	1.8828	9.1119	1.2621		56.36	0.61879
56.69	16.125	1.3814	8.6879	1.1704		56.69	0.56658		56.86	15.626	1.9275	9.3432	1.2947		56.86	0.62516
57.2	16.131	1.4283	8.8523	1.2204		57.2	0.57652		57.36	15.591	1.8983	8.8684	1.4218		57.36	0.59613
57.7	16.344	1.3997	8.7945	1.1573		57.7	0.56642		57.87	15.684	1.8024	8.9516	1.2945		57.87	0.59844
58.2	16.482	1.4512	8.8124	1.148		58.2	0.56273		58.37	15.829	1.8394	9.0564	1.3665		58.37	0.59933
58.71	16.695	1.4501	9.0139	1.2192		58.71	0.56754		58.87	16.118	1.7631	8.9241	1.3277		58.87	0.58094
59.21	16.696	1.5497	8.6829	1.293		59.21	0.54908		59.38	16.173	2.48	9.0918	1.3431		59.38	0.59392
59.71	16.754	1.4598	8.9948	1.2264		59.71	0.56436		59.88	16.537	1.9798	8.9491	1.3163		59.88	0.57003
60.22	16.777	1.5405	8.8959	1.1622		60.22	0.55803		60.38	16.278	2.0717	9.3298	1.2977		60.38	0.60102
									60.89	16.437	2.2674	9.0737	1.3095		60.89	0.5826

## Sheet: Fig.3-FS1b
	Data		Target layer fit
Time (hAPF)	Depth (um)	Time (hAPF)	Depth (um)
35.68	2.3244	35.68	10.536
36.17	2.0714	36.17	10.655
37.64	1.3232	37.64	11.012
38.14	1.5329	38.14	11.133
38.63	1.513	38.63	11.252
39.12	1.5033	39.12	11.371
39.62	1.9732	39.62	11.492
40.11	2.4708	40.11	11.611
40.61	1.6798	40.61	11.732
41.1	1.1319	41.1	11.851
41.59	1.3921	41.59	11.97
42.09	1.6642	42.09	12.092
42.58	2.6714	42.58	12.21
43.07	2.3868	43.07	12.329
43.57	1.3383	43.57	12.451
44.06	8.3752	44.06	12.57
44.55	11.777	44.55	12.688
45.05	13.9	45.05	12.81
45.54	12.936	45.54	12.929
46.04	13.258	46.04	13.05
46.53	13.332	46.53	13.169
47.02	13.262	47.02	13.288
47.52	14.071	47.52	13.409
48.01	15.684	48.01	13.528
48.5	14.098	48.5	13.647
49	13.531	49	13.768
49.5	15.675	49.5	13.89
50	14.863	50	14.011
50.5	18.329	50.5	14.132
51.01	16.174	51.01	14.256
51.51	15.329	51.51	14.377
52.01	16.976	52.01	14.499
52.51	14.62	52.51	14.62
53.01	16.979	53.01	14.741
53.51	15.377	53.51	14.863
54.01	15.631	54.01	14.984
54.51	15.678	54.51	15.105
55.02	16.115	55.02	15.229
55.52	16.132	55.52	15.35
56.02	16.133	56.02	15.472
56.52	16.092	56.52	15.593
57.03	16.541	57.03	15.717
57.53	16.121	57.53	15.838
58.03	16.073	58.03	15.959
58.54	16.114	58.54	16.083
59.04	17.36	59.04	16.205
59.55	16.86	59.55	16.328
60.05	17.197	60.05	16.45
60.55	17.424	60.55	16.571
