# Supplementary material for: Frazzled promotes growth cone attachment at the source of a Netrin gradient in the Drosophila visual system
Source: eLife. 2016 Oct 15;5:e20762. doi: 10.7554/eLife.20762 (PMC5108592; doi:10.7554/eLife.20762)
Supplement: Figure 3—source data 1. — DOI: http://dx.doi.org/10.7554/eLife.20762.012 [file elife-20762-fig3-data1.xls]

## Sheet: Fig.3a
Depth (Fraction of R8 reach), Bin Center	Columns (#)
0	0
0.025	0
0.05	0
0.075	0
0.1	0
0.125	0
0.15	0
0.175	0
0.2	0
0.225	0
0.25	0
0.275	0
0.3	0
0.325	0
0.35	0
0.375	0
0.4	0
0.425	0
0.45	0
0.475	0
0.5	3
0.525	10
0.55	9
0.575	7
0.6	24
0.625	53
0.65	98
0.675	111
0.7	71
0.725	13
0.75	6
0.775	2
0.8	0
0.825	0
0.85	0
0.875	0
0.9	0
0.925	0
0.95	0
0.975	0
1	0

## Sheet: Fig.3d
Parent Plot						Inset Plot
	R8	R8	Dm3	Dm3
Time (hAPF)	Depth (um)	Std (um)	Depth (um)	Std (um)		Time (hAPF)	Ratio
35.68	2.7678	1.343	5.8821	0.56997		35.68	2.028
36.17	2.733	1.2828	5.9257	0.49342		36.17	2.0545
37.64	2.591	1.2476	6.3353	0.53696		37.64	2.6207
38.14	2.7494	1.4296	6.5744	0.4987		38.14	2.239
38.63	2.6182	1.506	6.6759	0.50092		38.63	2.4033
39.12	2.5671	1.2692	6.8805	0.4277		39.12	2.4965
39.62	2.363	1.0275	7.0584	0.47931		39.62	2.7469
40.11	2.6041	1.5185	7.1598	0.52786		40.11	2.756
40.61	2.431	1.4681	7.4316	0.47242		40.61	2.8458
41.1	2.6921	1.5702	7.5097	0.52153		41.1	2.7218
41.59	2.9936	1.9727	7.6065	0.50905		41.59	2.6365
42.09	3.2371	2.2978	7.8679	0.47384		42.09	2.6019
42.58	3.4301	2.2774	7.999	0.49918		42.58	2.5281
43.07	3.8149	2.5089	8.005	0.61052		43.07	2.3733
43.57	4.9911	3.1838	8.168	0.56751		43.57	2.1221
44.06	6.2496	3.7656	8.3224	0.57609		44.06	1.8797
44.55	7.1769	3.8612	8.368	0.50934		44.55	1.6437
45.05	8.0862	3.8828	8.5558	0.53643		45.05	1.5085
45.54	9.9944	3.7665	8.4709	0.64769		45.54	1.0698
46.04	11.391	3.1679	8.5812	0.67357		46.04	0.88793
46.53	12.255	2.8222	8.5488	0.58457		46.53	0.78595
47.02	12.945	2.0211	8.5698	0.72945		47.02	0.70336
47.52	13.453	1.6627	8.7876	0.72093		47.52	0.68533
48.01	13.764	1.601	8.7106	0.64914		48.01	0.66406
48.5	13.956	1.5533	8.7902	0.70125		48.5	0.66023
49	13.797	1.5885	8.8944	0.80036		49	0.67362
49.5	14.075	1.3534	8.9752	0.71659		49.5	0.66464
50	14.043	1.5837	9.0433	0.74178		50	0.67189
50.5	14.201	1.4989	9.0918	0.91844		50.5	0.66725
51.01	14.336	1.3385	9.2017	0.81928		51.01	0.66764
51.51	14.438	1.4021	9.3602	0.88707		51.51	0.67336
52.01	14.497	1.4833	9.3918	0.83667		52.01	0.67361
52.51	14.558	1.5195	9.4674	0.8191		52.51	0.67601
53.01	14.852	1.4639	9.4678	0.95124		53.01	0.66298
53.51	14.946	1.4996	9.5996	0.87766		53.51	0.66779
54.01	15.119	1.6854	9.7657	1.1008		54.01	0.67049
54.51	15.167	1.4142	9.5222	0.97661		54.51	0.65258
55.02	15.196	1.4645	9.5974	0.99845		55.02	0.65616
55.52	15.201	1.4505	9.7153	1.1004		55.52	0.66278
56.02	15.647	1.5827	9.6958	1.0875		56.02	0.64481
56.52	15.48	1.6251	9.5851	0.98224		56.52	0.64526
57.03	15.591	1.6702	9.5619	0.93132		57.03	0.63963
57.53	15.889	1.5797	9.7378	1.0578		57.53	0.6382
58.03	15.967	1.5137	9.6658	1.0529		58.03	0.63042
58.54	15.971	1.7331	9.6453	1.0247		58.54	0.63029
59.04	16.313	1.6419	9.7747	1.1501		59.04	0.62411
59.55	16.386	1.6656	9.7603	0.97269		59.55	0.62129
60.05	16.496	1.586	9.7724	1.1105		60.05	0.61785
60.55	16.629	1.7732	9.8167	1.2128		60.55	0.61614
