# Supplementary material for: Frazzled promotes growth cone attachment at the source of a Netrin gradient in the Drosophila visual system
Source: eLife. 2016 Oct 15;5:e20762. doi: 10.7554/eLife.20762 (PMC5108592; doi:10.7554/eLife.20762)
Supplement: Figure 4—source data 1. — DOI: http://dx.doi.org/10.7554/eLife.20762.017 [file elife-20762-fig4-data1.xls]

## Sheet: Fig.4a
Absolute Depth			Normalized Depth
Depth (um), Bin Center	R8s (#)		Depth (Fraction of M0-M6), Bin Center	R8s (#)
0	0		0	0
0.6	0		0.025	0
1.2	0		0.05	0
1.8	0		0.075	0
2.4	0		0.1	0
3	0		0.125	0
3.6	0		0.15	0
4.2	0		0.175	0
4.8	0		0.2	0
5.4	0		0.225	0
6	0		0.25	0
6.6	0		0.275	0
7.2	0		0.3	0
7.8	0		0.325	0
8.4	0		0.35	0
9	0		0.375	0
9.6	0		0.4	0
10.2	0		0.425	0
10.8	0		0.45	0
11.4	1		0.475	0
12	1		0.5	0
12.6	2		0.525	0
13.2	11		0.55	0
13.8	16		0.575	0
14.4	39		0.6	2
15	51		0.625	3
15.6	70		0.65	22
16.2	59		0.675	37
16.8	59		0.7	90
17.4	63		0.725	112
18	47		0.75	99
18.6	37		0.775	60
19.2	26		0.8	39
19.8	19		0.825	19
20.4	8		0.85	16
21	4		0.875	4
21.6	0		0.9	7
22.2	0		0.925	3
22.8	0		0.95	0
23.4	0		0.975	0
24	0		1	0

## Sheet: Fig.4b
	Data		Gaussian Fits
Depth (Fraction of M0-M6), Bin Center	R8s (#)	Depth (Fraction of M0-M6)	Composite	C1	C2	C3
0	0	0	0.70839	0.70142	0.0069746	8.58e-26
0.025	0	0.005	0.89622	0.88773	0.0084891	2.06e-25
0.05	3	0.01	1.1259	1.1156	0.010308	4.9e-25
0.075	15	0.015	1.4045	1.392	0.012488	1.16e-24
0.1	26	0.02	1.7398	1.7247	0.015093	2.73e-24
0.125	39	0.025	2.14	2.1218	0.018198	6.39e-24
0.15	37	0.03	2.6138	2.5919	0.02189	1.48e-23
0.175	34	0.035	3.1701	3.1438	0.02627	3.42e-23
0.2	32	0.04	3.8177	3.7862	0.031452	7.85e-23
0.225	26	0.045	4.5653	4.5277	0.037568	1.79e-22
0.25	26	0.05	5.421	5.3762	0.044767	4.04e-22
0.275	25	0.055	6.3918	6.3386	0.053221	9.09e-22
0.3	26	0.06	7.4836	7.4204	0.063122	2.03e-21
0.325	14	0.065	8.7003	8.6256	0.074688	4.51e-21
0.35	20	0.07	10.044	9.9556	0.088167	9.94e-21
0.375	13	0.075	11.513	11.41	0.10383	2.18e-20
0.4	23	0.08	13.106	12.984	0.122	4.74e-20
0.425	30	0.085	14.813	14.67	0.143	1.02e-19
0.45	30	0.09	16.626	16.459	0.16722	2.2e-19
0.475	34	0.095	18.53	18.335	0.19509	4.7e-19
0.5	29	0.1	20.508	20.281	0.22707	9.97e-19
0.525	15	0.105	22.539	22.275	0.26367	2.1e-18
0.55	9	0.11	24.598	24.293	0.30544	4.4e-18
0.575	7	0.115	26.658	26.305	0.35301	9.14e-18
0.6	4	0.12	28.691	28.284	0.40702	1.89e-17
0.625	12	0.125	30.664	30.196	0.46819	3.88e-17
0.65	9	0.13	32.547	32.01	0.53728	7.91e-17
0.675	7	0.135	34.308	33.693	0.61513	1.6e-16
0.7	6	0.14	35.917	35.214	0.7026	3.23e-16
0.725	3	0.145	37.345	36.544	0.80061	6.46e-16
0.75	3	0.15	38.566	37.656	0.91016	1.28e-15
0.775	0	0.155	39.56	38.528	1.0323	2.53e-15
0.8	2	0.16	40.309	39.141	1.168	4.97e-15
0.825	1	0.165	40.802	39.484	1.3185	9.69e-15
0.85	0	0.17	41.033	39.548	1.4848	1.88e-14
0.875	0	0.175	41.001	39.332	1.6682	3.61e-14
0.9	0	0.18	40.711	38.842	1.8699	6.9e-14
0.925	0	0.185	40.177	38.086	2.091	1.31e-13
0.95	0	0.19	39.414	37.081	2.3328	2.47e-13
0.975	0	0.195	38.444	35.848	2.5964	4.64e-13
1	0	0.2	37.294	34.411	2.883	8.63e-13
		0.205	35.992	32.798	3.1936	1.6e-12
		0.21	34.57	31.04	3.5295	2.94e-12
		0.215	33.06	29.169	3.8915	5.37e-12
		0.22	31.497	27.217	4.2805	9.74e-12
		0.225	29.913	25.216	4.6974	1.76e-11
		0.23	28.34	23.197	5.1427	3.15e-11
		0.235	26.806	21.189	5.617	5.6e-11
		0.24	25.339	19.218	6.1207	9.9e-11
		0.245	23.961	17.307	6.6538	1.74e-10
		0.25	22.693	15.477	7.2163	3.04e-10
		0.255	21.55	13.742	7.808	5.26e-10
		0.26	20.543	12.115	8.4284	9.07e-10
		0.265	19.682	10.606	9.0766	1.55e-09
		0.27	18.97	9.2186	9.7517	2.64e-09
		0.275	18.409	7.9563	10.452	4.46e-09
		0.28	17.995	6.8184	11.177	7.49e-09
		0.285	17.726	5.802	11.924	1.25e-08
		0.29	17.593	4.9022	12.691	2.07e-08
		0.295	17.588	4.1127	13.475	3.41e-08
		0.3	17.7	3.4259	14.274	5.58e-08
		0.305	17.919	2.8337	15.085	9.06e-08
		0.31	18.232	2.3273	15.905	1.46e-07
		0.315	18.628	1.8979	16.73	2.35e-07
		0.32	19.093	1.5368	17.556	3.74e-07
		0.325	19.615	1.2356	18.379	5.93e-07
		0.33	20.183	0.98642	19.196	9.32e-07
		0.335	20.785	0.78192	20.003	1.46e-06
		0.34	21.409	0.61545	20.794	2.26e-06
		0.345	22.046	0.48099	21.565	3.49e-06
		0.35	22.686	0.37325	22.313	5.35e-06
		0.355	23.319	0.2876	23.032	8.15e-06
		0.36	23.938	0.22004	23.718	1.23e-05
		0.365	24.535	0.16716	24.368	1.85e-05
		0.37	25.102	0.12609	24.976	2.77e-05
		0.375	25.634	0.094441	25.539	4.11e-05
		0.38	26.124	0.070235	26.054	6.06e-05
		0.385	26.568	0.051865	26.517	8.88e-05
		0.39	26.962	0.038029	26.924	0.00012923
		0.395	27.301	0.027687	27.273	0.00018686
		0.4	27.582	0.020015	27.562	0.00026845
		0.405	27.803	0.014366	27.788	0.00038317
		0.41	27.961	0.010239	27.951	0.00054338
		0.415	28.056	0.0072463	28.048	0.00076558
		0.42	28.085	0.0050919	28.079	0.0010717
		0.425	28.049	0.0035528	28.044	0.0014904
		0.43	27.948	0.0024613	27.944	0.0020594
		0.435	27.783	0.0016932	27.778	0.0028272
		0.44	27.554	0.0011565	27.549	0.0038561
		0.445	27.263	0.00078437	27.257	0.0052255
		0.45	26.912	0.00052822	26.905	0.0070353
		0.455	26.504	0.0003532	26.494	0.0094106
		0.46	26.042	0.00023451	26.029	0.012507
		0.465	25.529	0.0001546	25.512	0.016513
		0.47	24.968	0.0001012	24.946	0.021663
		0.475	24.364	6.58e-05	24.336	0.028234
		0.48	23.721	4.25e-05	23.684	0.036561
		0.485	23.043	2.72e-05	22.996	0.047037
		0.49	22.336	1.73e-05	22.275	0.060124
		0.495	21.603	1.09e-05	21.527	0.076354
		0.5	20.85	6.86e-06	20.754	0.096338
		0.505	20.083	4.27e-06	19.962	0.12077
		0.51	19.306	2.64e-06	19.155	0.15041
		0.515	18.524	1.62e-06	18.338	0.18612
		0.52	17.743	9.9e-07	17.514	0.22881
		0.525	16.967	5.99e-07	16.688	0.27948
		0.53	16.202	3.6e-07	15.863	0.33915
		0.535	15.453	2.15e-07	15.044	0.40891
		0.54	14.723	1.28e-07	14.233	0.48983
		0.545	14.018	7.51e-08	13.435	0.58296
		0.55	13.341	4.39e-08	12.651	0.68932
		0.555	12.695	2.55e-08	11.885	0.8098
		0.56	12.085	1.47e-08	11.14	0.94518
		0.565	11.512	8.39e-09	10.416	1.0961
		0.57	10.98	4.77e-09	9.7168	1.2628
		0.575	10.489	2.69e-09	9.043	1.4455
		0.58	10.04	1.51e-09	8.3962	1.6439
		0.585	9.6348	8.37e-10	7.7773	1.8575
		0.59	9.2723	4.62e-10	7.1871	2.0852
		0.595	8.9517	2.54e-10	6.626	2.3257
		0.6	8.6715	1.38e-10	6.0944	2.5772
		0.605	8.4296	7.46e-11	5.5923	2.8373
		0.61	8.223	4e-11	5.1194	3.1035
		0.615	8.0483	2.13e-11	4.6755	3.3728
		0.62	7.9018	1.13e-11	4.2601	3.6416
		0.625	7.779	5.93e-12	3.8725	3.9065
		0.63	7.6754	3.1e-12	3.5118	4.1635
		0.635	7.586	1.6e-12	3.1773	4.4088
		0.64	7.5061	8.25e-13	2.8678	4.6382
		0.645	7.4305	4.21e-13	2.5824	4.8481
		0.65	7.3546	2.14e-13	2.32	5.0346
		0.655	7.2738	1.08e-13	2.0793	5.1945
		0.66	7.184	5.38e-14	1.8592	5.3248
		0.665	7.0815	2.67e-14	1.6585	5.423
		0.67	6.9633	1.32e-14	1.476	5.4874
		0.675	6.827	6.45e-15	1.3105	5.5165
		0.68	6.6707	3.13e-15	1.1608	5.51
		0.685	6.4936	1.51e-15	1.0257	5.4678
		0.69	6.2952	7.25e-16	0.90431	5.3909
		0.695	6.076	3.45e-16	0.79537	5.2806
		0.7	5.8371	1.63e-16	0.69791	5.1392
		0.705	5.5801	7.64e-17	0.61095	4.9691
		0.71	5.3072	3.56e-17	0.53357	4.7737
		0.715	5.0211	1.65e-17	0.4649	4.5562
		0.72	4.7246	7.56e-18	0.40411	4.3205
		0.725	4.4209	3.45e-18	0.35044	4.0705
		0.73	4.1133	1.56e-18	0.30319	3.8101
		0.735	3.805	7.02e-19	0.26169	3.5433
		0.74	3.4993	3.13e-19	0.22534	3.2739
		0.745	3.199	1.39e-19	0.19358	3.0054
		0.75	2.907	6.11e-20	0.16591	2.7411
		0.755	2.6257	2.67e-20	0.14186	2.4838
		0.76	2.3572	1.16e-20	0.12101	2.2362
		0.765	2.1031	4.99e-21	0.10298	2.0002
		0.77	1.8649	2.14e-21	0.087433	1.7775
		0.775	1.6434	9.07e-22	0.074057	1.5694
		0.78	1.4393	3.83e-22	0.062581	1.3767
		0.785	1.2526	1.6e-22	0.052758	1.1998
		0.79	1.0833	6.67e-23	0.044373	1.0389
		0.795	0.93101	2.75e-23	0.037232	0.89378
		0.8	0.7951	1.13e-23	0.031168	0.76394
		0.805	0.67476	4.59e-24	0.026029	0.64873
		0.81	0.56903	1.86e-24	0.021687	0.54734
		0.815	0.47683	7.45e-25	0.018027	0.4588
		0.82	0.39705	2.97e-25	0.014949	0.3821
		0.825	0.32853	1.18e-25	0.012367	0.31616
		0.83	0.27012	4.62e-26	0.010208	0.25991
		0.835	0.22069	1.8e-26	0.0084053	0.21229
		0.84	0.17917	6.98e-27	0.0069049	0.17227
		0.845	0.14454	2.68e-27	0.005659	0.13888
		0.85	0.11588	1.03e-27	0.004627	0.11125
		0.855	0.092309	3.89e-28	0.0037743	0.088534
		0.86	0.073074	1.46e-28	0.0030715	0.070002
		0.865	0.057485	5.47e-29	0.0024937	0.054991
		0.87	0.044939	2.03e-29	0.0020198	0.04292
		0.875	0.034913	7.49e-30	0.0016321	0.033281
		0.88	0.026956	2.74e-30	0.0013158	0.02564
		0.885	0.020684	9.97e-31	0.0010582	0.019626
		0.89	0.015774	3.6e-31	0.00084909	0.014925
		0.895	0.011956	1.29e-31	0.00067969	0.011277
		0.9	0.0090079	4.59e-32	0.00054281	0.0084651
		0.905	0.0067458	1.62e-32	0.00043247	0.0063134
		0.91	0.0050219	5.68e-33	0.00034376	0.0046781
		0.915	0.0037166	1.98e-33	0.00027259	0.003444
		0.92	0.0027347	6.85e-34	0.00021566	0.002519
		0.925	0.0020008	2.35e-34	0.00017021	0.0018306
		0.93	0.0014557	8.02e-35	0.00013402	0.0013217
		0.935	0.0010534	2.71e-35	0.00010528	0.00094807
		0.94	0.00075818	9.12e-36	8.25e-05	0.00067567
		0.945	0.00054294	3.05e-36	6.45e-05	0.00047843
		0.95	0.00038689	1.01e-36	5.03e-05	0.00033657
		0.955	0.0002744	3.32e-37	3.92e-05	0.00023524
		0.96	0.00019376	1.09e-37	3.04e-05	0.00016336
		0.965	0.00013625	3.52e-38	2.35e-05	0.0001127
		0.97	9.54e-05	1.13e-38	1.82e-05	7.73e-05
		0.975	6.66e-05	3.63e-39	1.4e-05	5.26e-05
		0.98	4.64e-05	1.15e-39	1.08e-05	3.56e-05
		0.985	3.22e-05	3.64e-40	8.28e-06	2.39e-05
		0.99	2.23e-05	1.14e-40	6.34e-06	1.6e-05
		0.995	1.54e-05	3.54e-41	4.84e-06	1.06e-05
		1	1.07e-05	1.0899e-41	3.69e-06	6.99e-06

## Sheet: Fig.4c
	Data		Gaussian Fits
Depth (Fraction of M0-M6), Bin Center	R8s (#)	Depth (Fraction of M0-M6)	Composite	C1	C2	C3
0	0	0	3.0937	3.0914	0.0022536	0
0.025	4	0.005	3.5776	3.5749	0.0027063	0
0.05	16	0.01	4.1173	4.1141	0.0032444	0
0.075	21	0.015	4.7159	4.712	0.0038831	0
0.1	30	0.02	5.3755	5.3709	0.0046396	0
0.125	33	0.025	6.0982	6.0926	0.0055342	0
0.15	27	0.03	6.8848	6.8782	0.0065903	0
0.175	17	0.035	7.7358	7.728	0.0078348	0
0.2	15	0.04	8.6504	8.6411	0.0092987	0
0.225	25	0.045	9.6268	9.6158	0.011018	0
0.25	14	0.05	10.662	10.649	0.013032	0
0.275	22	0.055	11.752	11.737	0.01539	0
0.3	13	0.06	12.892	12.874	0.018143	0
0.325	9	0.065	14.075	14.054	0.021354	0
0.35	14	0.07	15.293	15.268	0.02509	0
0.375	21	0.075	16.537	16.508	0.02943	0
0.4	13	0.08	17.797	17.763	0.034464	0
0.425	33	0.085	19.062	19.021	0.040291	0
0.45	37	0.09	20.319	20.272	0.047024	0
0.475	55	0.095	21.555	21.501	0.05479	0
0.5	61	0.1	22.759	22.695	0.063732	0
0.525	53	0.105	23.915	23.841	0.07401	0
0.55	41	0.11	25.01	24.924	0.0858	0
0.575	48	0.115	26.032	25.933	0.099303	0
0.6	64	0.12	26.967	26.852	0.11474	0
0.625	55	0.125	27.804	27.671	0.13235	0
0.65	67	0.13	28.531	28.379	0.15241	0
0.675	79	0.135	29.14	28.965	0.17521	0
0.7	43	0.14	29.623	29.422	0.20109	0
0.725	18	0.145	29.973	29.742	0.23041	0
0.75	15	0.15	30.186	29.922	0.26356	0
0.775	8	0.155	30.26	29.96	0.30097	0
0.8	6	0.16	30.196	29.853	0.34312	0
0.825	5	0.165	29.995	29.604	0.39051	0
0.85	2	0.17	29.661	29.217	0.44371	0
0.875	2	0.175	29.2	28.697	0.50331	0
0.9	2	0.18	28.62	28.05	0.56996	0
0.925	0	0.185	27.932	27.288	0.64435	0
0.95	1	0.19	27.145	26.418	0.72723	0
0.975	0	0.195	26.273	25.454	0.8194	0
1	0	0.2	25.329	24.408	0.9217	0
		0.205	24.327	23.292	1.035	0
		0.21	23.281	22.121	1.1604	0
		0.215	22.207	20.908	1.2987	0
		0.22	21.118	19.667	1.4511	0
		0.225	20.03	18.411	1.6186	0
		0.23	18.955	17.153	1.8025	0
		0.235	17.908	15.904	2.0038	0
		0.24	16.9	14.676	2.224	0
		0.245	15.941	13.477	2.4642	0
		0.25	15.043	12.317	2.7258	0
		0.255	14.213	11.203	3.01	0
		0.26	13.459	10.141	3.3184	0
		0.265	12.788	9.1356	3.6522	0
		0.27	12.203	8.1905	4.0129	0
		0.275	11.71	7.308	4.4018	0
		0.28	11.31	6.4893	4.8203	0
		0.285	11.005	5.7348	5.2698	0
		0.29	10.795	5.0437	5.7515	0
		0.295	10.681	4.4146	6.2667	0
		0.3	10.662	3.8455	6.8167	0
		0.305	10.736	3.3337	7.4025	1.4013e-45
		0.31	10.901	2.8762	8.0252	2.3822e-44
		0.315	11.155	2.4696	8.6857	4.3861e-43
		0.32	11.495	2.1103	9.3847	7.6105e-42
		0.325	11.918	1.7946	10.123	1.27e-40
		0.33	12.42	1.5189	10.901	2.03e-39
		0.335	12.999	1.2793	11.72	3.13e-38
		0.34	13.651	1.0724	12.578	4.62e-37
		0.345	14.372	0.89464	13.477	6.54e-36
		0.35	15.159	0.74277	14.416	8.9e-35
		0.355	16.009	0.61372	15.395	1.16e-33
		0.36	16.917	0.50467	16.412	1.46e-32
		0.365	17.881	0.41301	17.468	1.75e-31
		0.37	18.896	0.33637	18.56	2.03e-30
		0.375	19.96	0.27265	19.687	2.25e-29
		0.38	21.068	0.21993	20.848	2.4e-28
		0.385	22.217	0.17656	22.041	2.45e-27
		0.39	23.403	0.14107	23.262	2.41e-26
		0.395	24.622	0.11216	24.51	2.27e-25
		0.4	25.871	0.088758	25.782	2.05e-24
		0.405	27.144	0.0699	27.074	1.78e-23
		0.41	28.439	0.054784	28.384	1.49e-22
		0.415	29.75	0.042732	29.707	1.19e-21
		0.42	31.073	0.033171	31.04	9.14e-21
		0.425	32.403	0.025626	32.378	6.74e-20
		0.43	33.736	0.019703	33.717	4.78e-19
		0.435	35.068	0.015076	35.053	3.25e-18
		0.44	36.392	0.01148	36.38	2.12e-17
		0.445	37.703	0.0087001	37.695	1.33e-16
		0.45	38.998	0.0065618	38.992	7.99e-16
		0.455	40.27	0.0049253	40.265	4.62e-15
		0.46	41.515	0.0036793	41.511	2.56e-14
		0.465	42.726	0.0027353	42.724	1.36e-13
		0.47	43.9	0.0020237	43.898	6.96e-13
		0.475	45.031	0.0014901	45.029	3.42e-12
		0.48	46.113	0.001092	46.112	1.61e-11
		0.485	47.143	0.00079636	47.142	7.28e-11
		0.49	48.114	0.00057799	48.114	3.16e-10
		0.495	49.024	0.0004175	49.024	1.32e-09
		0.5	49.867	0.00030012	49.867	5.27e-09
		0.505	50.64	0.00021471	50.64	2.02e-08
		0.51	51.339	0.00015287	51.339	7.46e-08
		0.515	51.96	0.00010832	51.96	2.64e-07
		0.52	52.501	7.64e-05	52.501	8.97e-07
		0.525	52.958	5.36e-05	52.958	2.93e-06
		0.53	53.33	3.74e-05	53.33	9.17e-06
		0.535	53.614	2.6e-05	53.614	2.76e-05
		0.54	53.81	1.8e-05	53.81	7.96e-05
		0.545	53.916	1.24e-05	53.916	0.00022047
		0.55	53.932	8.49e-06	53.932	0.00058654
		0.555	53.859	5.79e-06	53.857	0.0014981
		0.56	53.696	3.93e-06	53.693	0.0036732
		0.565	53.448	2.65e-06	53.439	0.0086464
		0.57	53.117	1.78e-06	53.097	0.019539
		0.575	52.712	1.19e-06	52.669	0.042391
		0.58	52.246	7.94e-07	52.157	0.088289
		0.585	51.74	5.26e-07	51.564	0.17653
		0.59	51.231	3.47e-07	50.892	0.33886
		0.595	50.769	2.28e-07	50.144	0.62446
		0.6	50.43	1.49e-07	49.325	1.1048
		0.605	50.314	9.66e-08	48.438	1.8763
		0.61	50.546	6.25e-08	47.487	3.0594
		0.615	51.266	4.02e-08	46.477	4.7889
		0.62	52.608	2.58e-08	45.412	7.1965
		0.625	54.679	1.64e-08	44.297	10.382
		0.63	57.516	1.04e-08	43.137	14.379
		0.635	61.056	6.58e-09	41.937	19.119
		0.64	65.107	4.14e-09	40.702	24.405
		0.645	69.344	2.59e-09	39.438	29.906
		0.65	73.331	1.61e-09	38.148	35.183
		0.655	76.576	9.97e-10	36.839	39.736
		0.66	78.6	6.15e-10	35.516	43.084
		0.665	79.029	3.77e-10	34.182	44.847
		0.67	77.659	2.3e-10	32.844	44.815
		0.675	74.499	1.4e-10	31.505	42.994
		0.68	69.767	8.46e-11	30.17	39.597
		0.685	63.854	5.09e-11	28.843	35.011
		0.69	57.246	3.05e-11	27.528	29.718
		0.695	50.447	1.82e-11	26.23	24.217
		0.7	43.896	1.08e-11	24.95	18.945
		0.705	37.922	6.37e-12	23.694	14.229
		0.71	32.722	3.74e-12	22.463	10.259
		0.715	28.361	2.19e-12	21.26	7.1012
		0.72	24.806	1.27e-12	20.088	4.7189
		0.725	21.959	7.38e-13	18.948	3.0104
		0.73	19.687	4.25e-13	17.844	1.8437
		0.735	17.859	2.44e-13	16.775	1.084
		0.74	16.356	1.39e-13	15.745	0.61188
		0.745	15.084	7.91e-14	14.752	0.33157
		0.75	13.972	4.47e-14	13.8	0.17249
		0.755	12.973	2.52e-14	12.887	0.086147
		0.76	12.055	1.41e-14	12.014	0.041304
		0.765	11.201	7.85e-15	11.182	0.019012
		0.77	10.398	4.36e-15	10.389	0.0084013
		0.775	9.6408	2.4e-15	9.6373	0.003564
		0.78	8.926	1.32e-15	8.9246	0.0014515
		0.785	8.2513	7.22e-16	8.2507	0.00056752
		0.79	7.6152	3.93e-16	7.615	0.00021302
		0.795	7.0166	2.13e-16	7.0165	7.68e-05
		0.8	6.4542	1.15e-16	6.4542	2.66e-05
		0.805	5.927	6.15e-17	5.927	8.82e-06
		0.81	5.4338	3.28e-17	5.4337	2.81e-06
		0.815	4.9732	1.74e-17	4.9732	8.61e-07
		0.82	4.5441	9.22e-18	4.5441	2.53e-07
		0.825	4.145	4.85e-18	4.145	7.13e-08
		0.83	3.7747	2.54e-18	3.7747	1.93e-08
		0.835	3.4316	1.32e-18	3.4316	5.02e-09
		0.84	3.1146	6.86e-19	3.1146	1.25e-09
		0.845	2.8221	3.54e-19	2.8221	3e-10
		0.85	2.5527	1.82e-19	2.5527	6.91e-11
		0.855	2.3053	9.3e-20	2.3053	1.53e-11
		0.86	2.0783	4.73e-20	2.0783	3.24e-12
		0.865	1.8705	2.4e-20	1.8705	6.59e-13
		0.87	1.6807	1.21e-20	1.6807	1.29e-13
		0.875	1.5076	6.05e-21	1.5076	2.41e-14
		0.88	1.3501	3.02e-21	1.3501	4.35e-15
		0.885	1.207	1.5e-21	1.207	7.52e-16
		0.89	1.0772	7.42e-22	1.0772	1.25e-16
		0.895	0.95985	3.65e-22	0.95985	1.99e-17
		0.9	0.85381	1.79e-22	0.85381	3.04e-18
		0.905	0.75822	8.7e-23	0.75822	4.47e-19
		0.91	0.6722	4.22e-23	0.6722	6.3e-20
		0.915	0.59494	2.04e-23	0.59494	8.53e-21
		0.92	0.52568	9.78e-24	0.52568	1.11e-21
		0.925	0.4637	4.67e-24	0.4637	1.38e-22
		0.93	0.40834	2.22e-24	0.40834	1.66e-23
		0.935	0.359	1.05e-24	0.359	1.9e-24
		0.94	0.31508	4.96e-25	0.31508	2.1e-25
		0.945	0.27608	2.32e-25	0.27608	2.23e-26
		0.95	0.24149	1.08e-25	0.24149	2.26e-27
		0.955	0.21089	5.04e-26	0.21089	2.21e-28
		0.96	0.18386	2.33e-26	0.18386	2.07e-29
		0.965	0.16002	1.07e-26	0.16002	1.87e-30
		0.97	0.13904	4.9e-27	0.13904	1.61e-31
		0.975	0.12061	2.23e-27	0.12061	1.34e-32
		0.98	0.10444	1.01e-27	0.10444	1.06e-33
		0.985	0.090295	4.57e-28	0.090295	8.14e-35
		0.99	0.077932	2.05e-28	0.077932	5.98e-36
		0.995	0.06715	9.16e-29	0.06715	4.21e-37
		1	0.057762	4.08e-29	0.057762	2.85e-38

## Sheet: Fig.4d
	Data		Gaussian Fits
Depth (Fraction of M0-M6), Bin Center	R8s (#)	Depth (Fraction of M0-M6)	Composite	C1	C2	C3
0	1	0	1.9669	1.9538	0.013173	0
0.025	2	0.005	2.3562	2.3409	0.01529	0
0.05	8	0.01	2.8074	2.7897	0.017721	0
0.075	21	0.015	3.3271	3.3066	0.02051	0
0.1	28	0.02	3.9217	3.898	0.023705	0
0.125	49	0.025	4.5978	4.5704	0.027358	0
0.15	40	0.03	5.3615	5.3299	0.031529	0
0.175	36	0.035	6.2184	6.1821	0.036285	0
0.2	40	0.04	7.1735	7.1318	0.041698	0
0.225	29	0.045	8.2309	8.1831	0.047852	0
0.25	25	0.05	9.3934	9.3386	0.054836	0
0.275	19	0.055	10.662	10.6	0.062749	0
0.3	26	0.06	12.038	11.966	0.071703	0
0.325	15	0.065	13.518	13.436	0.081818	0
0.35	13	0.07	15.098	15.005	0.093228	0
0.375	13	0.075	16.772	16.666	0.10608	0
0.4	17	0.08	18.533	18.412	0.12053	0
0.425	27	0.085	20.368	20.231	0.13675	0
0.45	23	0.09	22.264	22.109	0.15494	0
0.475	36	0.095	24.207	24.032	0.1753	0
0.5	42	0.1	26.178	25.98	0.19805	0
0.525	46	0.105	28.159	27.935	0.22343	0
0.55	29	0.11	30.127	29.875	0.25172	0
0.575	35	0.115	32.061	31.777	0.28318	0
0.6	39	0.12	33.936	33.618	0.31812	0
0.625	38	0.125	35.731	35.374	0.35686	0
0.65	56	0.13	37.42	37.02	0.39975	0
0.675	41	0.135	38.981	38.534	0.44717	0
0.7	35	0.14	40.393	39.894	0.4995	4.2039e-45
0.725	23	0.145	41.635	41.078	0.55716	3.0829e-44
0.75	11	0.15	42.69	42.069	0.6206	2.186e-43
0.775	7	0.155	43.542	42.852	0.69027	1.5596e-42
0.8	2	0.16	44.18	43.413	0.76669	1.0899e-41
0.825	0	0.165	44.595	43.745	0.85035	7.42e-41
0.85	0	0.17	44.783	43.841	0.9418	4.98e-40
0.875	2	0.175	44.742	43.7	1.0416	3.28e-39
0.9	1	0.18	44.475	43.325	1.1504	2.11e-38
0.925	1	0.185	43.989	42.721	1.2687	1.34e-37
0.95	0	0.19	43.295	41.898	1.3971	8.32e-37
0.975	0	0.195	42.405	40.869	1.5365	5.07e-36
1	2	0.2	41.337	39.65	1.6873	3.03e-35
		0.205	40.11	38.26	1.8502	1.78e-34
		0.21	38.745	36.719	2.0261	1.02e-33
		0.215	37.266	35.05	2.2155	5.79e-33
		0.22	35.696	33.277	2.4192	3.21e-32
		0.225	34.06	31.423	2.6378	1.74e-31
		0.23	32.384	29.511	2.8721	9.3e-31
		0.235	30.69	27.567	3.1229	4.87e-30
		0.24	29.002	25.611	3.3906	2.5e-29
		0.245	27.343	23.666	3.6761	1.26e-28
		0.25	25.731	21.751	3.9801	6.22e-28
		0.255	24.186	19.883	4.303	3.01e-27
		0.26	22.722	18.077	4.6455	1.43e-26
		0.265	21.354	16.346	5.0081	6.69e-26
		0.27	20.093	14.701	5.3914	3.06e-25
		0.275	18.947	13.151	5.7958	1.38e-24
		0.28	17.922	11.7	6.2217	6.06e-24
		0.285	17.023	10.354	6.6695	2.62e-23
		0.29	16.252	9.1125	7.1393	1.11e-22
		0.295	15.608	7.9768	7.6313	4.62e-22
		0.3	15.091	6.945	8.1457	1.89e-21
		0.305	14.696	6.014	8.6824	7.56e-21
		0.31	14.421	5.1797	9.2413	2.97e-20
		0.315	14.259	4.4371	9.8223	1.15e-19
		0.32	14.205	3.7804	10.425	4.33e-19
		0.325	14.253	3.2035	11.049	1.61e-18
		0.33	14.394	2.7	11.694	5.86e-18
		0.335	14.622	2.2634	12.358	2.09e-17
		0.34	14.93	1.8871	13.042	7.33e-17
		0.345	15.31	1.5649	13.745	2.52e-16
		0.35	15.755	1.2907	14.464	8.5e-16
		0.355	16.259	1.0588	15.2	2.81e-15
		0.36	16.814	0.86387	15.95	9.13e-15
		0.365	17.415	0.70103	16.714	2.91e-14
		0.37	18.055	0.56581	17.49	9.09e-14
		0.375	18.729	0.45421	18.275	2.79e-13
		0.38	19.431	0.36266	19.069	8.38e-13
		0.385	20.157	0.28799	19.869	2.47e-12
		0.39	20.9	0.22747	20.673	7.16e-12
		0.395	21.657	0.17869	21.479	2.04e-11
		0.4	22.424	0.13962	22.285	5.67e-11
		0.405	23.196	0.1085	23.088	1.55e-10
		0.41	23.97	0.083859	23.886	4.16e-10
		0.415	24.741	0.064466	24.677	1.09e-09
		0.42	25.507	0.049291	25.458	2.83e-09
		0.425	26.263	0.037484	26.226	7.16e-09
		0.43	27.007	0.028352	26.979	1.78e-08
		0.435	27.736	0.021329	27.714	4.34e-08
		0.44	28.445	0.015958	28.429	1.04e-07
		0.445	29.133	0.011876	29.121	2.44e-07
		0.45	29.797	0.0087902	29.788	5.61e-07
		0.455	30.433	0.0064711	30.427	1.27e-06
		0.46	31.04	0.0047382	31.035	2.81e-06
		0.465	31.614	0.0034505	31.61	6.11e-06
		0.47	32.153	0.0024993	32.151	1.3e-05
		0.475	32.656	0.0018005	32.654	2.73e-05
		0.48	33.119	0.0012901	33.118	5.6e-05
		0.485	33.542	0.00091939	33.541	0.0001128
		0.49	33.922	0.00065166	33.921	0.00022293
		0.495	34.258	0.00045941	34.257	0.00043229
		0.5	34.548	0.00032213	34.547	0.00082239
		0.505	34.792	0.00022465	34.79	0.0015349
		0.51	34.988	0.00015582	34.985	0.0028107
		0.515	35.137	0.0001075	35.132	0.0050495
		0.52	35.237	7.38e-05	35.228	0.0089
		0.525	35.291	5.03e-05	35.275	0.01539
		0.53	35.298	3.42e-05	35.272	0.02611
		0.535	35.263	2.31e-05	35.219	0.043458
		0.54	35.187	1.55e-05	35.116	0.070966
		0.545	35.078	1.03e-05	34.964	0.11369
		0.55	34.942	6.87e-06	34.763	0.1787
		0.555	34.789	4.54e-06	34.514	0.27558
		0.56	34.635	2.98e-06	34.218	0.41692
		0.565	34.496	1.95e-06	33.877	0.61884
		0.57	34.392	1.27e-06	33.491	0.90119
		0.575	34.351	8.19e-07	33.063	1.2875
		0.58	34.399	5.27e-07	32.594	1.8047
		0.585	34.568	3.37e-07	32.086	2.4818
		0.59	34.89	2.14e-07	31.541	3.3484
		0.595	35.394	1.36e-07	30.962	4.4322
		0.6	36.105	8.53e-08	30.35	5.7558
		0.605	37.041	5.34e-08	29.707	7.3334
		0.61	38.204	3.32e-08	29.037	9.1667
		0.615	39.584	2.06e-08	28.342	11.242
		0.62	41.15	1.27e-08	27.625	13.526
		0.625	42.853	7.76e-09	26.887	15.966
		0.63	44.622	4.73e-09	26.132	18.49
		0.635	46.37	2.86e-09	25.362	21.008
		0.64	47.998	1.73e-09	24.58	23.418
		0.645	49.399	1.03e-09	23.788	25.61
		0.65	50.468	6.16e-10	22.989	27.479
		0.655	51.111	3.65e-10	22.185	28.926
		0.66	51.253	2.15e-10	21.379	29.873
		0.665	50.842	1.26e-10	20.573	30.269
		0.67	49.859	7.37e-11	19.77	30.089
		0.675	48.316	4.28e-11	18.971	29.345
		0.68	46.256	2.47e-11	18.178	28.078
		0.685	43.752	1.42e-11	17.394	26.358
		0.69	40.895	8.09e-12	16.619	24.276
		0.695	37.792	4.59e-12	15.857	21.935
		0.7	34.553	2.59e-12	15.109	19.445
		0.705	31.286	1.46e-12	14.375	16.912
		0.71	28.088	8.13e-13	13.657	14.43
		0.715	25.037	4.52e-13	12.957	12.08
		0.72	22.197	2.5e-13	12.275	9.9216
		0.725	19.608	1.37e-13	11.613	7.9946
		0.73	17.291	7.5e-14	10.971	6.3201
		0.735	15.251	4.08e-14	10.35	4.9019
		0.74	13.48	2.21e-14	9.7495	3.73
		0.745	11.956	1.19e-14	9.1713	2.7846
		0.75	10.655	6.35e-15	8.615	2.0395
		0.755	9.5466	3.38e-15	8.0811	1.4655
		0.76	8.6026	1.79e-15	7.5695	1.0332
		0.765	7.7948	9.4e-16	7.0802	0.71461
		0.77	7.098	4.92e-16	6.6131	0.48492
		0.775	6.4909	2.56e-16	6.1681	0.32283
		0.78	5.9557	1.33e-16	5.7448	0.21086
		0.785	5.4782	6.84e-17	5.3431	0.13512
		0.79	5.0473	3.5e-17	4.9623	0.084949
		0.795	4.6546	1.78e-17	4.6022	0.052397
		0.8	4.2938	9.04e-18	4.2621	0.031707
		0.805	3.9604	4.56e-18	3.9416	0.018825
		0.81	3.6509	2.28e-18	3.64	0.010965
		0.815	3.363	1.14e-18	3.3567	0.0062659
		0.82	3.0946	5.65e-19	3.091	0.003513
		0.825	2.8443	2.79e-19	2.8424	0.0019323
		0.83	2.6111	1.37e-19	2.61	0.0010428
		0.835	2.3938	6.67e-20	2.3933	0.00055208
		0.84	2.1917	3.24e-20	2.1914	0.00028677
		0.845	2.0038	1.56e-20	2.0037	0.00014614
		0.85	1.8295	7.5e-21	1.8295	7.31e-05
		0.855	1.6681	3.58e-21	1.668	3.58e-05
		0.86	1.5187	1.7e-21	1.5187	1.72e-05
		0.865	1.3807	8.03e-22	1.3807	8.14e-06
		0.87	1.2535	3.77e-22	1.2535	3.77e-06
		0.875	1.1365	1.76e-22	1.1365	1.71e-06
		0.88	1.0288	8.19e-23	1.0288	7.64e-07
		0.885	0.93009	3.79e-23	0.93009	3.34e-07
		0.89	0.83963	1.74e-23	0.83963	1.43e-07
		0.895	0.75689	7.96e-24	0.75689	6.04e-08
		0.9	0.68133	3.62e-24	0.68133	2.5e-08
		0.905	0.61245	1.64e-24	0.61245	1.01e-08
		0.91	0.54975	7.37e-25	0.54975	4.02e-09
		0.915	0.49277	3.3e-25	0.49277	1.57e-09
		0.92	0.44107	1.47e-25	0.44107	6e-10
		0.925	0.39423	6.49e-26	0.39423	2.25e-10
		0.93	0.35187	2.86e-26	0.35187	8.3e-11
		0.935	0.31361	1.25e-26	0.31361	3e-11
		0.94	0.27912	5.45e-27	0.27912	1.06e-11
		0.945	0.24806	2.36e-27	0.24806	3.7e-12
		0.95	0.22015	1.02e-27	0.22015	1.26e-12
		0.955	0.19511	4.36e-28	0.19511	4.23e-13
		0.96	0.17266	1.86e-28	0.17266	1.39e-13
		0.965	0.15258	7.87e-29	0.15258	4.48e-14
		0.97	0.13465	3.32e-29	0.13465	1.42e-14
		0.975	0.11865	1.39e-29	0.11865	4.39e-15
		0.98	0.10441	5.8e-30	0.10441	1.34e-15
		0.985	0.091747	2.41e-30	0.091747	3.99e-16
		0.99	0.080504	9.93e-31	0.080504	1.17e-16
		0.995	0.070539	4.08e-31	0.070539	3.36e-17
		1	0.06172	1.66e-31	0.06172	9.48e-18

## Sheet: Fig.4e
	Data		Gaussian Fits
Depth (Fraction of M0-M6), Bin Center	R8s (#)	Depth (Fraction of M0-M6)	Composite	C1	C2	C3
0	2	0	1.7724	1.7706	0.0018625	0
0.025	1	0.005	2.1312	2.129	0.0022535	0
0.05	6	0.01	2.549	2.5463	0.0027215	0
0.075	23	0.015	3.0326	3.0294	0.0032809	0
0.1	37	0.02	3.5889	3.5849	0.0039481	0
0.125	30	0.025	4.2246	4.2199	0.0047425	0
0.15	45	0.03	4.9467	4.941	0.0056865	0
0.175	41	0.035	5.7615	5.7547	0.006806	0
0.2	41	0.04	6.6751	6.6669	0.0081314	0
0.225	40	0.045	7.6925	7.6828	0.0096973	0
0.25	32	0.05	8.818	8.8065	0.011544	0
0.275	21	0.055	10.055	10.041	0.013717	0
0.3	17	0.06	11.404	11.388	0.016271	0
0.325	18	0.065	12.867	12.847	0.019265	0
0.35	21	0.07	14.439	14.417	0.022769	0
0.375	21	0.075	16.119	16.092	0.026861	0
0.4	21	0.08	17.899	17.867	0.031633	0
0.425	22	0.085	19.77	19.733	0.037184	0
0.45	32	0.09	21.721	21.677	0.043632	0
0.475	51	0.095	23.739	23.688	0.051105	0
0.5	54	0.1	25.807	25.747	0.05975	0
0.525	55	0.105	27.907	27.838	0.069732	0
0.55	42	0.11	30.019	29.938	0.081236	0
0.575	52	0.115	32.121	32.027	0.094466	0
0.6	47	0.12	34.189	34.079	0.10965	0
0.625	62	0.125	36.198	36.071	0.12705	0
0.65	59	0.13	38.124	37.977	0.14695	0
0.675	47	0.135	39.942	39.772	0.16965	0
0.7	35	0.14	41.627	41.431	0.19552	0
0.725	12	0.145	43.156	42.931	0.22491	0
0.75	6	0.15	44.507	44.249	0.25827	0
0.775	4	0.155	45.661	45.365	0.29603	0
0.8	3	0.16	46.603	46.264	0.3387	0
0.825	0	0.165	47.317	46.93	0.38683	0
0.85	2	0.17	47.795	47.354	0.44101	0
0.875	2	0.175	48.03	47.528	0.50186	1.4013e-45
0.9	2	0.18	48.02	47.45	0.57008	1.4013e-44
0.925	0	0.185	47.768	47.121	0.64641	1.3172e-43
0.95	1	0.19	47.278	46.547	0.73165	1.1505e-42
0.975	0	0.195	46.562	45.735	0.82662	9.8693e-42
1	0	0.2	45.632	44.7	0.93225	8.25e-41
		0.205	44.506	43.457	1.0495	6.74e-40
		0.21	43.204	42.024	1.1793	5.38e-39
		0.215	41.746	40.423	1.3229	4.19e-38
		0.22	40.159	38.678	1.4812	3.19e-37
		0.225	38.466	36.811	1.6555	2.37e-36
		0.23	36.696	34.849	1.8469	1.73e-35
		0.235	34.873	32.817	2.0568	1.23e-34
		0.24	33.025	30.739	2.2864	8.51e-34
		0.245	31.177	28.64	2.5371	5.77e-33
		0.25	29.354	26.543	2.8102	3.82e-32
		0.255	27.577	24.47	3.1071	2.47e-31
		0.26	25.868	22.439	3.4292	1.56e-30
		0.265	24.245	20.467	3.7778	9.65e-30
		0.27	22.724	18.57	4.1544	5.82e-29
		0.275	21.319	16.759	4.5603	3.43e-28
		0.28	20.041	15.045	4.9968	1.98e-27
		0.285	18.899	13.434	5.4653	1.11e-26
		0.29	17.899	11.932	5.967	6.12e-26
		0.295	17.045	10.542	6.5029	3.29e-25
		0.3	16.339	9.265	7.0742	1.72e-24
		0.305	15.781	8.0992	7.6819	8.84e-24
		0.31	15.369	7.0426	8.3268	4.43e-23
		0.315	15.101	6.0913	9.0095	2.17e-22
		0.32	14.971	5.2407	9.7307	1.04e-21
		0.325	14.976	4.4849	10.491	4.84e-21
		0.33	15.107	3.8178	11.29	2.21e-20
		0.335	15.36	3.2327	12.128	9.84e-20
		0.34	15.727	2.7228	13.004	4.29e-19
		0.345	16.2	2.2811	13.919	1.82e-18
		0.35	16.773	1.901	14.872	7.59e-18
		0.355	17.437	1.5758	15.861	3.08e-17
		0.36	18.185	1.2993	16.885	1.22e-16
		0.365	19.009	1.0656	17.943	4.74e-16
		0.37	19.903	0.86938	19.034	1.8e-15
		0.375	20.859	0.70551	20.154	6.65e-15
		0.38	21.871	0.56949	21.301	2.4e-14
		0.385	22.931	0.45726	22.474	8.49e-14
		0.39	24.033	0.3652	23.668	2.93e-13
		0.395	25.171	0.29013	24.881	9.88e-13
		0.4	26.338	0.22927	26.109	3.26e-12
		0.405	27.528	0.18021	27.348	1.05e-11
		0.41	28.735	0.1409	28.594	3.29e-11
		0.415	29.953	0.10959	29.843	1.01e-10
		0.42	31.176	0.084776	31.091	3.04e-10
		0.425	32.398	0.065236	32.333	8.91e-10
		0.43	33.614	0.049934	33.564	2.55e-09
		0.435	34.817	0.038018	34.779	7.14e-09
		0.44	36.001	0.028793	35.973	1.95e-08
		0.445	37.162	0.021691	37.141	5.22e-08
		0.45	38.294	0.016253	38.277	1.36e-07
		0.455	39.39	0.012115	39.378	3.47e-07
		0.46	40.446	0.0089821	40.437	8.65e-07
		0.465	41.457	0.0066242	41.45	2.11e-06
		0.47	42.417	0.0048593	42.412	5.01e-06
		0.475	43.322	0.0035458	43.319	1.16e-05
		0.48	44.167	0.0025736	44.164	2.64e-05
		0.485	44.948	0.0018581	44.946	5.86e-05
		0.49	45.66	0.0013344	45.658	0.00012687
		0.495	46.3	0.00095322	46.299	0.00026855
		0.5	46.865	0.00067732	46.864	0.00055537
		0.505	47.352	0.00047873	47.351	0.0011221
		0.51	47.759	0.00033657	47.756	0.0022149
		0.515	48.083	0.00023537	48.078	0.0042715
		0.52	48.324	0.00016373	48.315	0.0080481
		0.525	48.481	0.00011329	48.466	0.014815
		0.53	48.557	7.8e-05	48.53	0.026643
		0.535	48.554	5.34e-05	48.507	0.046813
		0.54	48.476	3.64e-05	48.396	0.08036
		0.545	48.333	2.46e-05	48.199	0.13477
		0.55	48.136	1.66e-05	47.916	0.22083
		0.555	47.902	1.11e-05	47.548	0.3535
		0.56	47.652	7.41e-06	47.099	0.55287
		0.565	47.415	4.92e-06	46.57	0.84478
		0.57	47.225	3.24e-06	45.964	1.2611
		0.575	47.124	2.13e-06	45.284	1.8393
		0.58	47.155	1.39e-06	44.534	2.6209
		0.585	47.366	9.01e-07	43.718	3.6486
		0.59	47.801	5.82e-07	42.839	4.9624
		0.595	48.496	3.74e-07	41.902	6.5941
		0.6	49.473	2.39e-07	40.912	8.5606
		0.605	50.731	1.52e-07	39.874	10.858
		0.61	52.246	9.6e-08	38.791	13.455
		0.615	53.96	6.04e-08	37.671	16.289
		0.62	55.783	3.78e-08	36.516	19.266
		0.625	57.598	2.35e-08	35.334	22.264
		0.63	59.264	1.45e-08	34.128	25.135
		0.635	60.629	8.95e-09	32.904	27.725
		0.64	61.544	5.48e-09	31.667	29.877
		0.645	61.876	3.34e-09	30.421	31.455
		0.65	61.527	2.02e-09	29.172	32.355
		0.655	60.438	1.22e-09	27.924	32.514
		0.66	58.604	7.3e-10	26.681	31.923
		0.665	56.068	4.36e-10	25.447	30.621
		0.67	52.923	2.58e-10	24.227	28.696
		0.675	49.298	1.52e-10	23.024	26.274
		0.68	45.343	8.94e-11	21.841	23.502
		0.685	41.221	5.22e-11	20.681	20.539
		0.69	37.085	3.03e-11	19.548	17.537
		0.695	33.073	1.75e-11	18.444	14.629
		0.7	29.293	1.01e-11	17.371	11.922
		0.705	25.823	5.75e-12	16.331	9.4928
		0.71	22.709	3.27e-12	15.325	7.3845
		0.715	19.968	1.85e-12	14.355	5.6122
		0.72	17.59	1.04e-12	13.423	4.1672
		0.725	15.551	5.81e-13	12.528	3.023
		0.73	13.815	3.24e-13	11.673	2.1425
		0.735	12.339	1.79e-13	10.856	1.4835
		0.74	11.081	9.86e-14	10.078	1.0036
		0.745	10.002	5.4e-14	9.3384	0.66331
		0.75	9.0663	2.94e-14	8.6379	0.42832
		0.755	8.2458	1.59e-14	7.9756	0.27021
		0.76	7.5174	8.59e-15	7.3509	0.16654
		0.765	6.8631	4.61e-15	6.7628	0.10029
		0.77	6.2696	2.46e-15	6.2106	0.058998
		0.775	5.7271	1.3e-15	5.6932	0.033911
		0.78	5.2286	6.88e-16	5.2095	0.019042
		0.785	4.7688	3.61e-16	4.7584	0.010447
		0.79	4.3441	1.89e-16	4.3385	0.0055996
		0.795	3.9514	9.79e-17	3.9485	0.0029323
		0.8	3.5886	5.06e-17	3.5871	0.0015002
		0.805	3.2536	2.6e-17	3.2529	0.00074987
		0.81	2.9449	1.33e-17	2.9445	0.00036619
		0.815	2.6608	6.75e-18	2.6606	0.00017471
		0.82	2.3998	3.42e-18	2.3997	8.14e-05
		0.825	2.1606	1.72e-18	2.1605	3.71e-05
		0.83	1.9417	8.6e-19	1.9417	1.65e-05
		0.835	1.7418	4.28e-19	1.7418	7.17e-06
		0.84	1.5598	2.12e-19	1.5598	3.05e-06
		0.845	1.3942	1.04e-19	1.3942	1.26e-06
		0.85	1.244	5.11e-20	1.244	5.12e-07
		0.855	1.1079	2.49e-20	1.1079	2.03e-07
		0.86	0.98499	1.21e-20	0.98499	7.85e-08
		0.865	0.87412	5.82e-21	0.87412	2.97e-08
		0.87	0.77433	2.79e-21	0.77433	1.1e-08
		0.875	0.68469	1.33e-21	0.68469	3.95e-09
		0.88	0.60435	6.32e-22	0.60435	1.39e-09
		0.885	0.53247	2.98e-22	0.53247	4.8e-10
		0.89	0.46829	1.4e-22	0.46829	1.62e-10
		0.895	0.41111	6.53e-23	0.41111	5.31e-11
		0.9	0.36026	3.04e-23	0.36026	1.71e-11
		0.905	0.31513	1.4e-23	0.31513	5.35e-12
		0.91	0.27516	6.45e-24	0.27516	1.64e-12
		0.915	0.23983	2.95e-24	0.23983	4.91e-13
		0.92	0.20865	1.34e-24	0.20865	1.44e-13
		0.925	0.18121	6.06e-25	0.18121	4.11e-14
		0.93	0.15709	2.73e-25	0.15709	1.15e-14
		0.935	0.13593	1.22e-25	0.13593	3.13e-15
		0.94	0.11741	5.43e-26	0.11741	8.35e-16
		0.945	0.10124	2.41e-26	0.10124	2.18e-16
		0.95	0.087129	1.06e-26	0.087129	5.54e-17
		0.955	0.074854	4.64e-27	0.074854	1.38e-17
		0.96	0.064192	2.02e-27	0.064192	3.34e-18
		0.965	0.05495	8.77e-28	0.05495	7.93e-19
		0.97	0.046954	3.78e-28	0.046954	1.84e-19
		0.975	0.040049	1.62e-28	0.040049	4.17e-20
		0.98	0.034098	6.92e-29	0.034098	9.22e-21
		0.985	0.028979	2.94e-29	0.028979	1.99e-21
		0.99	0.024584	1.24e-29	0.024584	4.21e-22
		0.995	0.020818	5.21e-30	0.020818	8.69e-23
		1	0.017597	2.17e-30	0.017597	1.75e-23

## Sheet: Fig.4f
	Net		Net+FraRNAi
Depth (Fraction of M0-M6)	Fraction of R8 population	Depth (Fraction of M0-M6)	Fraction of R8 population
0.0014541	0	0.0049528	0
0.0014541	0.001139	0.0049528	0.00099305
0.029659	0.0022779	0.012052	0.0019861
0.030382	0.0034169	0.037288	0.0029791
0.044335	0.0045558	0.040596	0.0039722
0.045485	0.0056948	0.049286	0.0049652
0.04826	0.0068337	0.05514	0.0059583
0.050366	0.0079727	0.059894	0.0069513
0.055788	0.0091116	0.059952	0.0079444
0.058685	0.010251	0.062109	0.0089374
0.061299	0.01139	0.064788	0.0099305
0.061767	0.012528	0.065273	0.010924
0.062797	0.013667	0.067311	0.011917
0.062922	0.014806	0.067754	0.01291
0.062934	0.015945	0.069887	0.013903
0.063666	0.017084	0.0709	0.014896
0.063936	0.018223	0.071846	0.015889
0.064798	0.019362	0.073692	0.016882
0.06508	0.020501	0.073865	0.017875
0.067676	0.02164	0.075911	0.018868
0.069392	0.022779	0.076727	0.019861
0.069735	0.023918	0.077163	0.020854
0.077257	0.025057	0.078601	0.021847
0.078122	0.026196	0.079902	0.02284
0.078208	0.027335	0.080998	0.023833
0.078348	0.028474	0.081655	0.024826
0.078703	0.029613	0.081703	0.025819
0.079584	0.030752	0.083791	0.026812
0.082364	0.031891	0.083977	0.027805
0.084111	0.03303	0.085548	0.028798
0.086067	0.034169	0.08629	0.029791
0.087088	0.035308	0.086434	0.030785
0.087267	0.036446	0.086965	0.031778
0.088133	0.037585	0.087509	0.032771
0.088727	0.038724	0.087532	0.033764
0.091949	0.039863	0.087726	0.034757
0.092691	0.041002	0.08785	0.03575
0.093837	0.042141	0.087987	0.036743
0.095015	0.04328	0.089583	0.037736
0.095815	0.044419	0.090139	0.038729
0.096629	0.045558	0.090384	0.039722
0.096865	0.046697	0.091199	0.040715
0.097577	0.047836	0.091482	0.041708
0.097757	0.048975	0.091718	0.042701
0.09835	0.050114	0.09246	0.043694
0.099877	0.051253	0.093138	0.044687
0.10089	0.052392	0.093151	0.04568
0.10158	0.053531	0.093183	0.046673
0.10289	0.05467	0.094128	0.047666
0.10331	0.055809	0.094156	0.048659
0.10474	0.056948	0.095098	0.049652
0.1049	0.058087	0.096194	0.050645
0.10491	0.059226	0.097456	0.051639
0.10547	0.060364	0.097482	0.052632
0.10561	0.061503	0.097754	0.053625
0.10671	0.062642	0.098251	0.054618
0.1073	0.063781	0.099463	0.055611
0.10958	0.06492	0.10026	0.056604
0.10968	0.066059	0.10068	0.057597
0.10976	0.067198	0.10163	0.05859
0.11216	0.068337	0.10645	0.059583
0.11253	0.069476	0.10758	0.060576
0.11265	0.070615	0.10862	0.061569
0.11278	0.071754	0.10925	0.062562
0.11391	0.072893	0.10954	0.063555
0.11401	0.074032	0.11014	0.064548
0.11412	0.075171	0.11032	0.065541
0.11442	0.07631	0.11106	0.066534
0.11569	0.077449	0.11189	0.067527
0.11605	0.078588	0.11211	0.06852
0.11639	0.079727	0.11262	0.069513
0.11695	0.080866	0.1127	0.070506
0.11704	0.082005	0.11277	0.0715
0.11776	0.083144	0.11304	0.072493
0.11812	0.084282	0.11489	0.073486
0.11837	0.085421	0.11724	0.074479
0.11864	0.08656	0.11748	0.075472
0.11885	0.087699	0.11783	0.076465
0.1191	0.088838	0.11898	0.077458
0.11972	0.089977	0.121	0.078451
0.11979	0.091116	0.12108	0.079444
0.11997	0.092255	0.122	0.080437
0.12013	0.093394	0.12224	0.08143
0.12029	0.094533	0.12225	0.082423
0.12035	0.095672	0.12272	0.083416
0.12098	0.096811	0.1229	0.084409
0.12101	0.09795	0.12441	0.085402
0.12101	0.099089	0.12506	0.086395
0.12148	0.10023	0.12639	0.087388
0.12186	0.10137	0.12649	0.088381
0.12189	0.10251	0.13055	0.089374
0.12264	0.10364	0.13064	0.090367
0.12537	0.10478	0.1307	0.09136
0.1256	0.10592	0.13089	0.092354
0.12567	0.10706	0.13277	0.093347
0.12705	0.1082	0.13289	0.09434
0.1272	0.10934	0.13505	0.095333
0.1272	0.11048	0.13529	0.096326
0.12743	0.11162	0.13628	0.097319
0.12758	0.11276	0.13705	0.098312
0.12837	0.1139	0.13775	0.099305
0.12849	0.11503	0.13782	0.1003
0.12961	0.11617	0.13798	0.10129
0.13089	0.11731	0.13828	0.10228
0.13276	0.11845	0.1386	0.10328
0.13328	0.11959	0.13966	0.10427
0.13427	0.12073	0.1432	0.10526
0.1359	0.12187	0.14481	0.10626
0.13599	0.12301	0.14549	0.10725
0.13673	0.12415	0.14554	0.10824
0.13797	0.12528	0.14595	0.10924
0.1388	0.12642	0.14786	0.11023
0.1388	0.12756	0.14838	0.11122
0.13954	0.1287	0.1485	0.11221
0.13965	0.12984	0.14873	0.11321
0.13978	0.13098	0.1491	0.1142
0.14063	0.13212	0.14944	0.11519
0.14206	0.13326	0.15008	0.11619
0.14215	0.1344	0.15024	0.11718
0.14256	0.13554	0.15038	0.11817
0.14295	0.13667	0.15083	0.11917
0.14427	0.13781	0.15108	0.12016
0.14475	0.13895	0.15131	0.12115
0.1463	0.14009	0.15188	0.12214
0.1467	0.14123	0.15206	0.12314
0.14769	0.14237	0.15225	0.12413
0.1477	0.14351	0.15321	0.12512
0.14777	0.14465	0.15337	0.12612
0.14788	0.14579	0.15349	0.12711
0.14829	0.14692	0.1537	0.1281
0.14858	0.14806	0.15379	0.1291
0.14974	0.1492	0.15388	0.13009
0.15081	0.15034	0.154	0.13108
0.1517	0.15148	0.15424	0.13208
0.1521	0.15262	0.15504	0.13307
0.15347	0.15376	0.15535	0.13406
0.1545	0.1549	0.15561	0.13505
0.15529	0.15604	0.15723	0.13605
0.15536	0.15718	0.158	0.13704
0.1558	0.15831	0.1582	0.13803
0.1571	0.15945	0.15847	0.13903
0.15717	0.16059	0.15859	0.14002
0.15725	0.16173	0.15909	0.14101
0.15729	0.16287	0.16007	0.14201
0.15755	0.16401	0.16109	0.143
0.15949	0.16515	0.16255	0.14399
0.15988	0.16629	0.16301	0.14499
0.16011	0.16743	0.16312	0.14598
0.16223	0.16856	0.16327	0.14697
0.16228	0.1697	0.16335	0.14796
0.16279	0.17084	0.16345	0.14896
0.16344	0.17198	0.1651	0.14995
0.1653	0.17312	0.16514	0.15094
0.16644	0.17426	0.16531	0.15194
0.16713	0.1754	0.16569	0.15293
0.16775	0.17654	0.16729	0.15392
0.16932	0.17768	0.1682	0.15492
0.17091	0.17882	0.16828	0.15591
0.17114	0.17995	0.17019	0.1569
0.17157	0.18109	0.17028	0.15789
0.17234	0.18223	0.17032	0.15889
0.17277	0.18337	0.17103	0.15988
0.17369	0.18451	0.1715	0.16087
0.17394	0.18565	0.1722	0.16187
0.17486	0.18679	0.17224	0.16286
0.17499	0.18793	0.17312	0.16385
0.17501	0.18907	0.17329	0.16485
0.17581	0.19021	0.17331	0.16584
0.17611	0.19134	0.17434	0.16683
0.17669	0.19248	0.17497	0.16783
0.17723	0.19362	0.17563	0.16882
0.17726	0.19476	0.17746	0.16981
0.17751	0.1959	0.17747	0.1708
0.17801	0.19704	0.17774	0.1718
0.17813	0.19818	0.17789	0.17279
0.17827	0.19932	0.17818	0.17378
0.17946	0.20046	0.17844	0.17478
0.18152	0.20159	0.17931	0.17577
0.18156	0.20273	0.17951	0.17676
0.18265	0.20387	0.17985	0.17776
0.18329	0.20501	0.18235	0.17875
0.18358	0.20615	0.18266	0.17974
0.18507	0.20729	0.18313	0.18073
0.18561	0.20843	0.18578	0.18173
0.18647	0.20957	0.18668	0.18272
0.18721	0.21071	0.18705	0.18371
0.1889	0.21185	0.18781	0.18471
0.18928	0.21298	0.18828	0.1857
0.18995	0.21412	0.1883	0.18669
0.19073	0.21526	0.18866	0.18769
0.19148	0.2164	0.18938	0.18868
0.19174	0.21754	0.19113	0.18967
0.19253	0.21868	0.19151	0.19067
0.19344	0.21982	0.19171	0.19166
0.19391	0.22096	0.19192	0.19265
0.19451	0.2221	0.19329	0.19364
0.19492	0.22323	0.19356	0.19464
0.19516	0.22437	0.19382	0.19563
0.19671	0.22551	0.19455	0.19662
0.19683	0.22665	0.1955	0.19762
0.19729	0.22779	0.19586	0.19861
0.19809	0.22893	0.1959	0.1996
0.19831	0.23007	0.19645	0.2006
0.19847	0.23121	0.19716	0.20159
0.19913	0.23235	0.20057	0.20258
0.19943	0.23349	0.2008	0.20357
0.20104	0.23462	0.20116	0.20457
0.20132	0.23576	0.20175	0.20556
0.20136	0.2369	0.20189	0.20655
0.20145	0.23804	0.20195	0.20755
0.20234	0.23918	0.20256	0.20854
0.20279	0.24032	0.20555	0.20953
0.20338	0.24146	0.20604	0.21053
0.20363	0.2426	0.20665	0.21152
0.20368	0.24374	0.2067	0.21251
0.20385	0.24487	0.20701	0.21351
0.20399	0.24601	0.20712	0.2145
0.20512	0.24715	0.20767	0.21549
0.2055	0.24829	0.20772	0.21648
0.20598	0.24943	0.20845	0.21748
0.20713	0.25057	0.20855	0.21847
0.20889	0.25171	0.20901	0.21946
0.20901	0.25285	0.20946	0.22046
0.21123	0.25399	0.21083	0.22145
0.21183	0.25513	0.21191	0.22244
0.21187	0.25626	0.21195	0.22344
0.21289	0.2574	0.21241	0.22443
0.2136	0.25854	0.21305	0.22542
0.21381	0.25968	0.21322	0.22642
0.21382	0.26082	0.21396	0.22741
0.21419	0.26196	0.21443	0.2284
0.21577	0.2631	0.21458	0.22939
0.21636	0.26424	0.21463	0.23039
0.21704	0.26538	0.21529	0.23138
0.2208	0.26651	0.21619	0.23237
0.22391	0.26765	0.21652	0.23337
0.22409	0.26879	0.21737	0.23436
0.2246	0.26993	0.21749	0.23535
0.22465	0.27107	0.21808	0.23635
0.22494	0.27221	0.21854	0.23734
0.2253	0.27335	0.21947	0.23833
0.22532	0.27449	0.21986	0.23932
0.226	0.27563	0.22012	0.24032
0.22615	0.27677	0.22038	0.24131
0.22649	0.2779	0.22077	0.2423
0.22806	0.27904	0.22206	0.2433
0.23124	0.28018	0.22288	0.24429
0.23128	0.28132	0.22407	0.24528
0.23187	0.28246	0.22432	0.24628
0.23249	0.2836	0.22506	0.24727
0.23268	0.28474	0.22517	0.24826
0.23332	0.28588	0.22603	0.24926
0.2344	0.28702	0.22703	0.25025
0.23498	0.28815	0.22947	0.25124
0.23562	0.28929	0.23059	0.25223
0.24278	0.29043	0.23098	0.25323
0.24338	0.29157	0.23104	0.25422
0.24633	0.29271	0.23123	0.25521
0.24758	0.29385	0.23188	0.25621
0.24915	0.29499	0.23206	0.2572
0.2503	0.29613	0.23373	0.25819
0.25044	0.29727	0.23494	0.25919
0.25076	0.29841	0.2355	0.26018
0.25095	0.29954	0.23678	0.26117
0.25113	0.30068	0.23695	0.26216
0.25197	0.30182	0.23713	0.26316
0.25208	0.30296	0.23735	0.26415
0.25247	0.3041	0.23756	0.26514
0.25254	0.30524	0.23926	0.26614
0.25332	0.30638	0.24055	0.26713
0.25396	0.30752	0.24083	0.26812
0.25556	0.30866	0.24107	0.26912
0.256	0.30979	0.24156	0.27011
0.25713	0.31093	0.2422	0.2711
0.25743	0.31207	0.24238	0.2721
0.25816	0.31321	0.24453	0.27309
0.25869	0.31435	0.24475	0.27408
0.25873	0.31549	0.24476	0.27507
0.25895	0.31663	0.24482	0.27607
0.26116	0.31777	0.24512	0.27706
0.26413	0.31891	0.24565	0.27805
0.26691	0.32005	0.24632	0.27905
0.2671	0.32118	0.24769	0.28004
0.26855	0.32232	0.24838	0.28103
0.27046	0.32346	0.24847	0.28203
0.27289	0.3246	0.24917	0.28302
0.27371	0.32574	0.25	0.28401
0.27486	0.32688	0.25004	0.285
0.27595	0.32802	0.25005	0.286
0.27614	0.32916	0.251	0.28699
0.27807	0.3303	0.25164	0.28798
0.2783	0.33144	0.252	0.28898
0.27914	0.33257	0.25318	0.28997
0.2793	0.33371	0.25407	0.29096
0.28057	0.33485	0.25444	0.29196
0.28204	0.33599	0.25608	0.29295
0.28467	0.33713	0.2574	0.29394
0.28493	0.33827	0.25933	0.29494
0.28702	0.33941	0.26248	0.29593
0.28754	0.34055	0.26288	0.29692
0.28801	0.34169	0.26338	0.29791
0.28815	0.34282	0.26436	0.29891
0.29067	0.34396	0.26545	0.2999
0.29075	0.3451	0.26554	0.30089
0.29223	0.34624	0.26674	0.30189
0.29322	0.34738	0.26862	0.30288
0.29367	0.34852	0.26966	0.30387
0.29413	0.34966	0.27104	0.30487
0.29515	0.3508	0.27176	0.30586
0.29604	0.35194	0.27371	0.30685
0.29718	0.35308	0.27373	0.30785
0.29725	0.35421	0.27382	0.30884
0.2989	0.35535	0.27395	0.30983
0.29967	0.35649	0.27536	0.31082
0.30087	0.35763	0.2766	0.31182
0.30154	0.35877	0.27807	0.31281
0.30187	0.35991	0.27985	0.3138
0.30196	0.36105	0.28001	0.3148
0.30349	0.36219	0.28201	0.31579
0.30374	0.36333	0.28666	0.31678
0.30389	0.36446	0.28823	0.31778
0.30506	0.3656	0.28912	0.31877
0.30811	0.36674	0.29083	0.31976
0.30952	0.36788	0.29241	0.32075
0.30967	0.36902	0.29296	0.32175
0.31497	0.37016	0.29514	0.32274
0.31635	0.3713	0.29715	0.32373
0.31722	0.37244	0.29978	0.32473
0.31767	0.37358	0.29983	0.32572
0.31916	0.37472	0.30038	0.32671
0.32416	0.37585	0.30433	0.32771
0.32702	0.37699	0.3089	0.3287
0.32902	0.37813	0.30983	0.32969
0.32902	0.37927	0.3108	0.33069
0.33032	0.38041	0.31131	0.33168
0.33246	0.38155	0.31161	0.33267
0.33279	0.38269	0.31195	0.33366
0.33323	0.38383	0.31282	0.33466
0.33389	0.38497	0.31467	0.33565
0.33459	0.3861	0.31555	0.33664
0.34156	0.38724	0.31573	0.33764
0.34392	0.38838	0.31607	0.33863
0.34444	0.38952	0.3161	0.33962
0.34682	0.39066	0.31743	0.34062
0.35015	0.3918	0.31974	0.34161
0.35073	0.39294	0.31992	0.3426
0.35081	0.39408	0.32007	0.34359
0.35147	0.39522	0.32587	0.34459
0.35434	0.39636	0.33006	0.34558
0.35921	0.39749	0.3313	0.34657
0.35948	0.39863	0.33174	0.34757
0.36045	0.39977	0.33375	0.34856
0.36212	0.40091	0.33552	0.34955
0.36682	0.40205	0.33605	0.35055
0.36704	0.40319	0.3363	0.35154
0.36925	0.40433	0.33798	0.35253
0.37049	0.40547	0.33799	0.35353
0.3713	0.40661	0.33859	0.35452
0.37283	0.40774	0.33887	0.35551
0.37348	0.40888	0.34102	0.3565
0.37513	0.41002	0.34285	0.3575
0.3774	0.41116	0.34466	0.35849
0.37787	0.4123	0.34698	0.35948
0.37816	0.41344	0.34756	0.36048
0.38046	0.41458	0.34911	0.36147
0.38347	0.41572	0.35257	0.36246
0.3883	0.41686	0.35376	0.36346
0.38963	0.418	0.35383	0.36445
0.3906	0.41913	0.35404	0.36544
0.39077	0.42027	0.35761	0.36643
0.39111	0.42141	0.3585	0.36743
0.3915	0.42255	0.35891	0.36842
0.39501	0.42369	0.35961	0.36941
0.39509	0.42483	0.36009	0.37041
0.39712	0.42597	0.36094	0.3714
0.39951	0.42711	0.361	0.37239
0.3998	0.42825	0.3628	0.37339
0.40347	0.42938	0.36669	0.37438
0.40674	0.43052	0.36711	0.37537
0.40846	0.43166	0.36738	0.37637
0.40974	0.4328	0.36866	0.37736
0.41076	0.43394	0.36922	0.37835
0.41147	0.43508	0.37034	0.37934
0.41393	0.43622	0.37185	0.38034
0.41429	0.43736	0.37377	0.38133
0.41491	0.4385	0.37498	0.38232
0.41575	0.43964	0.37604	0.38332
0.41627	0.44077	0.37635	0.38431
0.41711	0.44191	0.37798	0.3853
0.41758	0.44305	0.38072	0.3863
0.41759	0.44419	0.38125	0.38729
0.41824	0.44533	0.38263	0.38828
0.4202	0.44647	0.38278	0.38928
0.42109	0.44761	0.38313	0.39027
0.42245	0.44875	0.38549	0.39126
0.423	0.44989	0.38562	0.39225
0.42337	0.45103	0.38578	0.39325
0.42478	0.45216	0.38831	0.39424
0.42551	0.4533	0.38838	0.39523
0.42643	0.45444	0.38867	0.39623
0.42695	0.45558	0.39069	0.39722
0.4274	0.45672	0.39085	0.39821
0.42779	0.45786	0.39165	0.39921
0.42938	0.459	0.39264	0.4002
0.42986	0.46014	0.39428	0.40119
0.43084	0.46128	0.39489	0.40218
0.43202	0.46241	0.39834	0.40318
0.43563	0.46355	0.39937	0.40417
0.43574	0.46469	0.40199	0.40516
0.43656	0.46583	0.40348	0.40616
0.43755	0.46697	0.40502	0.40715
0.43809	0.46811	0.40516	0.40814
0.44005	0.46925	0.40588	0.40914
0.44197	0.47039	0.40672	0.41013
0.44204	0.47153	0.4086	0.41112
0.44218	0.47267	0.41068	0.41212
0.44226	0.4738	0.41083	0.41311
0.44285	0.47494	0.41165	0.4141
0.4443	0.47608	0.41528	0.41509
0.44509	0.47722	0.41546	0.41609
0.44807	0.47836	0.41888	0.41708
0.44978	0.4795	0.41903	0.41807
0.45117	0.48064	0.42221	0.41907
0.45123	0.48178	0.42242	0.42006
0.45221	0.48292	0.42255	0.42105
0.45367	0.48405	0.42301	0.42205
0.45471	0.48519	0.42345	0.42304
0.45509	0.48633	0.42404	0.42403
0.45583	0.48747	0.42416	0.42502
0.4559	0.48861	0.42651	0.42602
0.45808	0.48975	0.42793	0.42701
0.45868	0.49089	0.42837	0.428
0.46013	0.49203	0.42851	0.429
0.46309	0.49317	0.4302	0.42999
0.46315	0.49431	0.43143	0.43098
0.46383	0.49544	0.43156	0.43198
0.46431	0.49658	0.43357	0.43297
0.46435	0.49772	0.43384	0.43396
0.46485	0.49886	0.43514	0.43496
0.46542	0.5	0.43669	0.43595
0.46562	0.50114	0.43817	0.43694
0.46727	0.50228	0.43831	0.43793
0.46933	0.50342	0.43885	0.43893
0.47072	0.50456	0.43926	0.43992
0.47083	0.50569	0.44083	0.44091
0.4724	0.50683	0.44102	0.44191
0.47276	0.50797	0.44223	0.4429
0.47327	0.50911	0.44274	0.44389
0.47413	0.51025	0.4436	0.44489
0.47489	0.51139	0.44599	0.44588
0.47542	0.51253	0.44652	0.44687
0.47588	0.51367	0.44729	0.44786
0.47633	0.51481	0.44753	0.44886
0.47678	0.51595	0.44926	0.44985
0.47733	0.51708	0.45098	0.45084
0.47841	0.51822	0.45128	0.45184
0.4789	0.51936	0.4534	0.45283
0.47914	0.5205	0.45386	0.45382
0.48003	0.52164	0.45457	0.45482
0.4804	0.52278	0.45475	0.45581
0.48093	0.52392	0.45476	0.4568
0.48177	0.52506	0.45524	0.4578
0.48229	0.5262	0.45601	0.45879
0.4833	0.52733	0.45675	0.45978
0.48354	0.52847	0.45723	0.46077
0.4842	0.52961	0.45796	0.46177
0.48495	0.53075	0.45844	0.46276
0.48538	0.53189	0.46041	0.46375
0.4871	0.53303	0.46067	0.46475
0.48761	0.53417	0.46138	0.46574
0.48764	0.53531	0.46158	0.46673
0.48778	0.53645	0.46224	0.46773
0.48809	0.53759	0.46285	0.46872
0.48915	0.53872	0.46362	0.46971
0.49128	0.53986	0.46378	0.47071
0.4913	0.541	0.46388	0.4717
0.49171	0.54214	0.46415	0.47269
0.49356	0.54328	0.46505	0.47368
0.49372	0.54442	0.4658	0.47468
0.49448	0.54556	0.46681	0.47567
0.49489	0.5467	0.4671	0.47666
0.4956	0.54784	0.46783	0.47766
0.49695	0.54897	0.46787	0.47865
0.49699	0.55011	0.46817	0.47964
0.49731	0.55125	0.46862	0.48064
0.49755	0.55239	0.46875	0.48163
0.49771	0.55353	0.46906	0.48262
0.49848	0.55467	0.46912	0.48361
0.4991	0.55581	0.46956	0.48461
0.50101	0.55695	0.47008	0.4856
0.5013	0.55809	0.47076	0.48659
0.50145	0.55923	0.47147	0.48759
0.50234	0.56036	0.47188	0.48858
0.5028	0.5615	0.47196	0.48957
0.50354	0.56264	0.47198	0.49057
0.50429	0.56378	0.47252	0.49156
0.50506	0.56492	0.47325	0.49255
0.50522	0.56606	0.47418	0.49355
0.50546	0.5672	0.4742	0.49454
0.50622	0.56834	0.47481	0.49553
0.5069	0.56948	0.47586	0.49652
0.50869	0.57062	0.47596	0.49752
0.51022	0.57175	0.47876	0.49851
0.51092	0.57289	0.47883	0.4995
0.51106	0.57403	0.47975	0.5005
0.51114	0.57517	0.48093	0.50149
0.51142	0.57631	0.48144	0.50248
0.51178	0.57745	0.48214	0.50348
0.51191	0.57859	0.48229	0.50447
0.51247	0.57973	0.48258	0.50546
0.51249	0.58087	0.4826	0.50645
0.51261	0.582	0.48338	0.50745
0.51273	0.58314	0.48348	0.50844
0.51421	0.58428	0.48353	0.50943
0.51447	0.58542	0.48362	0.51043
0.51475	0.58656	0.48366	0.51142
0.51501	0.5877	0.48387	0.51241
0.51514	0.58884	0.48417	0.51341
0.51541	0.58998	0.48498	0.5144
0.51591	0.59112	0.48571	0.51539
0.51736	0.59226	0.4858	0.51639
0.51785	0.59339	0.486	0.51738
0.51838	0.59453	0.48648	0.51837
0.51935	0.59567	0.48894	0.51936
0.52058	0.59681	0.48953	0.52036
0.52117	0.59795	0.48995	0.52135
0.52168	0.59909	0.49194	0.52234
0.52206	0.60023	0.4924	0.52334
0.52211	0.60137	0.49258	0.52433
0.52342	0.60251	0.4931	0.52532
0.52412	0.60364	0.49328	0.52632
0.52443	0.60478	0.49369	0.52731
0.52484	0.60592	0.49414	0.5283
0.52546	0.60706	0.49421	0.52929
0.52609	0.6082	0.49431	0.53029
0.52657	0.60934	0.49448	0.53128
0.52661	0.61048	0.49509	0.53227
0.52662	0.61162	0.49558	0.53327
0.52671	0.61276	0.49653	0.53426
0.52676	0.6139	0.49667	0.53525
0.52688	0.61503	0.49698	0.53625
0.52723	0.61617	0.497	0.53724
0.53007	0.61731	0.49738	0.53823
0.53074	0.61845	0.49755	0.53923
0.53075	0.61959	0.49804	0.54022
0.53126	0.62073	0.4982	0.54121
0.53235	0.62187	0.49855	0.5422
0.53339	0.62301	0.49891	0.5432
0.53392	0.62415	0.49905	0.54419
0.53394	0.62528	0.49914	0.54518
0.53402	0.62642	0.4993	0.54618
0.5341	0.62756	0.49938	0.54717
0.53437	0.6287	0.49946	0.54816
0.53438	0.62984	0.4999	0.54916
0.53499	0.63098	0.5	0.55015
0.53541	0.63212	0.50253	0.55114
0.537	0.63326	0.50359	0.55214
0.5381	0.6344	0.50374	0.55313
0.53825	0.63554	0.504	0.55412
0.53974	0.63667	0.50405	0.55511
0.53998	0.63781	0.50421	0.55611
0.54129	0.63895	0.50525	0.5571
0.54146	0.64009	0.50554	0.55809
0.54196	0.64123	0.50564	0.55909
0.54205	0.64237	0.50675	0.56008
0.54227	0.64351	0.50727	0.56107
0.54333	0.64465	0.50789	0.56207
0.54445	0.64579	0.50792	0.56306
0.5452	0.64692	0.50793	0.56405
0.54611	0.64806	0.50848	0.56504
0.5467	0.6492	0.50873	0.56604
0.54747	0.65034	0.51004	0.56703
0.54926	0.65148	0.51033	0.56802
0.5515	0.65262	0.51086	0.56902
0.55217	0.65376	0.51197	0.57001
0.55289	0.6549	0.51208	0.571
0.55346	0.65604	0.51231	0.572
0.5535	0.65718	0.51334	0.57299
0.55383	0.65831	0.51399	0.57398
0.55451	0.65945	0.51446	0.57498
0.55533	0.66059	0.51508	0.57597
0.55596	0.66173	0.51534	0.57696
0.55747	0.66287	0.51554	0.57795
0.55874	0.66401	0.51577	0.57895
0.56093	0.66515	0.51649	0.57994
0.5624	0.66629	0.51689	0.58093
0.56263	0.66743	0.51798	0.58193
0.563	0.66856	0.51801	0.58292
0.5639	0.6697	0.51818	0.58391
0.56514	0.67084	0.51838	0.58491
0.56521	0.67198	0.51858	0.5859
0.56603	0.67312	0.51977	0.58689
0.56631	0.67426	0.52015	0.58788
0.56654	0.6754	0.52046	0.58888
0.5673	0.67654	0.52129	0.58987
0.56771	0.67768	0.52217	0.59086
0.56799	0.67882	0.52248	0.59186
0.56808	0.67995	0.52296	0.59285
0.56851	0.68109	0.52365	0.59384
0.56947	0.68223	0.5237	0.59484
0.57125	0.68337	0.52408	0.59583
0.57451	0.68451	0.52413	0.59682
0.57458	0.68565	0.52421	0.59782
0.57503	0.68679	0.52427	0.59881
0.57553	0.68793	0.52432	0.5998
0.57569	0.68907	0.52549	0.60079
0.57603	0.69021	0.52561	0.60179
0.57699	0.69134	0.52564	0.60278
0.57703	0.69248	0.52574	0.60377
0.57916	0.69362	0.52637	0.60477
0.58016	0.69476	0.52655	0.60576
0.58047	0.6959	0.52661	0.60675
0.58178	0.69704	0.52691	0.60775
0.58185	0.69818	0.52702	0.60874
0.58252	0.69932	0.5274	0.60973
0.58289	0.70046	0.52775	0.61072
0.58367	0.70159	0.5281	0.61172
0.58422	0.70273	0.52851	0.61271
0.58516	0.70387	0.52904	0.6137
0.58559	0.70501	0.52943	0.6147
0.58737	0.70615	0.52946	0.61569
0.5881	0.70729	0.53124	0.61668
0.58832	0.70843	0.53139	0.61768
0.58951	0.70957	0.53152	0.61867
0.58966	0.71071	0.53226	0.61966
0.59023	0.71185	0.53301	0.62066
0.59039	0.71298	0.53429	0.62165
0.5905	0.71412	0.53434	0.62264
0.59148	0.71526	0.5359	0.62363
0.59381	0.7164	0.5359	0.62463
0.59428	0.71754	0.53622	0.62562
0.59471	0.71868	0.5373	0.62661
0.59522	0.71982	0.53865	0.62761
0.59546	0.72096	0.53904	0.6286
0.59576	0.7221	0.54059	0.62959
0.59641	0.72323	0.54068	0.63059
0.59648	0.72437	0.5407	0.63158
0.59655	0.72551	0.54086	0.63257
0.59695	0.72665	0.54103	0.63357
0.59784	0.72779	0.54132	0.63456
0.59986	0.72893	0.54132	0.63555
0.60088	0.73007	0.54138	0.63654
0.60195	0.73121	0.54152	0.63754
0.60208	0.73235	0.54182	0.63853
0.60215	0.73349	0.54236	0.63952
0.60244	0.73462	0.54285	0.64052
0.6031	0.73576	0.54383	0.64151
0.60346	0.7369	0.5455	0.6425
0.60354	0.73804	0.54579	0.6435
0.60394	0.73918	0.5464	0.64449
0.60583	0.74032	0.54817	0.64548
0.60659	0.74146	0.54861	0.64647
0.60814	0.7426	0.54863	0.64747
0.60935	0.74374	0.54872	0.64846
0.60945	0.74487	0.55027	0.64945
0.61012	0.74601	0.55041	0.65045
0.61028	0.74715	0.55115	0.65144
0.61074	0.74829	0.55278	0.65243
0.61144	0.74943	0.5532	0.65343
0.61242	0.75057	0.55357	0.65442
0.61596	0.75171	0.55359	0.65541
0.61682	0.75285	0.55404	0.65641
0.61692	0.75399	0.55605	0.6574
0.6205	0.75513	0.55685	0.65839
0.62056	0.75626	0.55781	0.65938
0.62141	0.7574	0.55815	0.66038
0.62149	0.75854	0.55931	0.66137
0.62191	0.75968	0.55945	0.66236
0.62234	0.76082	0.55993	0.66336
0.62278	0.76196	0.56015	0.66435
0.62293	0.7631	0.56098	0.66534
0.62398	0.76424	0.5614	0.66634
0.62528	0.76538	0.56179	0.66733
0.62583	0.76651	0.56206	0.66832
0.62598	0.76765	0.56272	0.66931
0.62627	0.76879	0.56279	0.67031
0.62661	0.76993	0.56388	0.6713
0.62671	0.77107	0.56457	0.67229
0.62704	0.77221	0.56511	0.67329
0.62768	0.77335	0.56534	0.67428
0.62893	0.77449	0.56592	0.67527
0.62908	0.77563	0.56605	0.67627
0.62909	0.77677	0.56624	0.67726
0.62982	0.7779	0.56627	0.67825
0.62983	0.77904	0.56636	0.67925
0.63002	0.78018	0.56673	0.68024
0.6303	0.78132	0.56676	0.68123
0.63042	0.78246	0.56744	0.68222
0.63071	0.7836	0.56793	0.68322
0.63185	0.78474	0.56821	0.68421
0.63274	0.78588	0.56929	0.6852
0.63321	0.78702	0.5693	0.6862
0.6351	0.78815	0.56939	0.68719
0.63588	0.78929	0.57001	0.68818
0.6363	0.79043	0.57021	0.68918
0.63635	0.79157	0.57107	0.69017
0.63659	0.79271	0.57155	0.69116
0.6375	0.79385	0.57158	0.69215
0.63806	0.79499	0.57166	0.69315
0.63831	0.79613	0.5718	0.69414
0.63835	0.79727	0.57374	0.69513
0.6385	0.79841	0.57381	0.69613
0.63947	0.79954	0.57456	0.69712
0.63999	0.80068	0.5754	0.69811
0.64089	0.80182	0.57553	0.69911
0.64111	0.80296	0.57579	0.7001
0.64146	0.8041	0.57873	0.70109
0.64173	0.80524	0.57901	0.70209
0.64229	0.80638	0.57983	0.70308
0.64326	0.80752	0.5808	0.70407
0.64404	0.80866	0.58165	0.70506
0.64456	0.80979	0.58174	0.70606
0.64506	0.81093	0.5818	0.70705
0.6452	0.81207	0.58191	0.70804
0.64534	0.81321	0.58224	0.70904
0.64622	0.81435	0.5823	0.71003
0.64647	0.81549	0.58256	0.71102
0.64647	0.81663	0.58269	0.71202
0.64653	0.81777	0.58332	0.71301
0.64703	0.81891	0.58338	0.714
0.64715	0.82005	0.58477	0.715
0.64744	0.82118	0.5851	0.71599
0.64747	0.82232	0.58572	0.71698
0.64835	0.82346	0.58646	0.71797
0.64852	0.8246	0.58694	0.71897
0.64993	0.82574	0.58707	0.71996
0.65165	0.82688	0.58777	0.72095
0.65208	0.82802	0.58847	0.72195
0.6522	0.82916	0.58915	0.72294
0.65304	0.8303	0.58934	0.72393
0.65333	0.83144	0.58949	0.72493
0.65361	0.83257	0.58961	0.72592
0.65382	0.83371	0.58982	0.72691
0.6541	0.83485	0.59	0.7279
0.65412	0.83599	0.59151	0.7289
0.65446	0.83713	0.59173	0.72989
0.65466	0.83827	0.59228	0.73088
0.65471	0.83941	0.59237	0.73188
0.65516	0.84055	0.59257	0.73287
0.65612	0.84169	0.59452	0.73386
0.65619	0.84282	0.5947	0.73486
0.65699	0.84396	0.59484	0.73585
0.65794	0.8451	0.59523	0.73684
0.65886	0.84624	0.59588	0.73784
0.65913	0.84738	0.59601	0.73883
0.6592	0.84852	0.59712	0.73982
0.65943	0.84966	0.59765	0.74081
0.65947	0.8508	0.59808	0.74181
0.66022	0.85194	0.59889	0.7428
0.66125	0.85308	0.59935	0.74379
0.66125	0.85421	0.59981	0.74479
0.66174	0.85535	0.60064	0.74578
0.6619	0.85649	0.60075	0.74677
0.66198	0.85763	0.60117	0.74777
0.66332	0.85877	0.60192	0.74876
0.66427	0.85991	0.60198	0.74975
0.6645	0.86105	0.60206	0.75074
0.66463	0.86219	0.60212	0.75174
0.66646	0.86333	0.60245	0.75273
0.66666	0.86446	0.60272	0.75372
0.66681	0.8656	0.60322	0.75472
0.66687	0.86674	0.6035	0.75571
0.66691	0.86788	0.60454	0.7567
0.66705	0.86902	0.60483	0.7577
0.66738	0.87016	0.60594	0.75869
0.66752	0.8713	0.608	0.75968
0.66761	0.87244	0.60861	0.76068
0.66798	0.87358	0.60954	0.76167
0.66819	0.87472	0.60972	0.76266
0.66856	0.87585	0.6105	0.76365
0.66861	0.87699	0.61061	0.76465
0.66931	0.87813	0.61156	0.76564
0.6698	0.87927	0.61214	0.76663
0.67021	0.88041	0.61268	0.76763
0.67133	0.88155	0.6136	0.76862
0.6718	0.88269	0.61376	0.76961
0.67212	0.88383	0.61447	0.77061
0.67247	0.88497	0.61448	0.7716
0.67385	0.8861	0.61486	0.77259
0.67389	0.88724	0.61519	0.77358
0.67428	0.88838	0.61533	0.77458
0.67638	0.88952	0.61602	0.77557
0.67662	0.89066	0.61617	0.77656
0.67715	0.8918	0.61631	0.77756
0.67787	0.89294	0.61661	0.77855
0.67803	0.89408	0.61679	0.77954
0.67864	0.89522	0.61716	0.78054
0.68035	0.89636	0.61769	0.78153
0.68051	0.89749	0.61786	0.78252
0.68141	0.89863	0.61828	0.78352
0.68311	0.89977	0.61828	0.78451
0.6833	0.90091	0.61831	0.7855
0.6841	0.90205	0.61852	0.78649
0.68549	0.90319	0.61863	0.78749
0.68593	0.90433	0.61906	0.78848
0.68928	0.90547	0.6191	0.78947
0.68936	0.90661	0.61973	0.79047
0.68937	0.90774	0.62045	0.79146
0.68944	0.90888	0.62064	0.79245
0.6897	0.91002	0.62077	0.79345
0.69022	0.91116	0.62249	0.79444
0.69085	0.9123	0.6228	0.79543
0.69159	0.91344	0.62471	0.79643
0.69236	0.91458	0.62472	0.79742
0.69241	0.91572	0.62499	0.79841
0.69327	0.91686	0.62657	0.7994
0.69355	0.918	0.62661	0.8004
0.6945	0.91913	0.62699	0.80139
0.69545	0.92027	0.6273	0.80238
0.69578	0.92141	0.62771	0.80338
0.69605	0.92255	0.62807	0.80437
0.69635	0.92369	0.62851	0.80536
0.69725	0.92483	0.62852	0.80636
0.69729	0.92597	0.62909	0.80735
0.69941	0.92711	0.62947	0.80834
0.70083	0.92825	0.63029	0.80933
0.70085	0.92938	0.63084	0.81033
0.70146	0.93052	0.63107	0.81132
0.70199	0.93166	0.63116	0.81231
0.70268	0.9328	0.63227	0.81331
0.70321	0.93394	0.6329	0.8143
0.7038	0.93508	0.63305	0.81529
0.70498	0.93622	0.63309	0.81629
0.70504	0.93736	0.63341	0.81728
0.70534	0.9385	0.63412	0.81827
0.70592	0.93964	0.63414	0.81927
0.70869	0.94077	0.63431	0.82026
0.7088	0.94191	0.63438	0.82125
0.71003	0.94305	0.63473	0.82224
0.71233	0.94419	0.63473	0.82324
0.71302	0.94533	0.63501	0.82423
0.71373	0.94647	0.63522	0.82522
0.71379	0.94761	0.6356	0.82622
0.71475	0.94875	0.63568	0.82721
0.71484	0.94989	0.6372	0.8282
0.71573	0.95103	0.63763	0.8292
0.71631	0.95216	0.63782	0.83019
0.71796	0.9533	0.63804	0.83118
0.7189	0.95444	0.63807	0.83217
0.71902	0.95558	0.63833	0.83317
0.72021	0.95672	0.63833	0.83416
0.72076	0.95786	0.63858	0.83515
0.72192	0.959	0.6392	0.83615
0.7224	0.96014	0.63938	0.83714
0.72259	0.96128	0.63987	0.83813
0.72368	0.96241	0.64096	0.83913
0.7247	0.96355	0.64097	0.84012
0.73121	0.96469	0.64151	0.84111
0.73245	0.96583	0.64153	0.84211
0.7326	0.96697	0.64195	0.8431
0.73602	0.96811	0.64266	0.84409
0.737	0.96925	0.64266	0.84508
0.7372	0.97039	0.64269	0.84608
0.73959	0.97153	0.64327	0.84707
0.74781	0.97267	0.64364	0.84806
0.74781	0.9738	0.64376	0.84906
0.74819	0.97494	0.64411	0.85005
0.74906	0.97608	0.64477	0.85104
0.75188	0.97722	0.64519	0.85204
0.75322	0.97836	0.6458	0.85303
0.75681	0.9795	0.64693	0.85402
0.75734	0.98064	0.64786	0.85501
0.75802	0.98178	0.64896	0.85601
0.76142	0.98292	0.64931	0.857
0.76293	0.98405	0.65017	0.85799
0.7646	0.98519	0.6503	0.85899
0.76607	0.98633	0.65035	0.85998
0.7667	0.98747	0.65035	0.86097
0.76715	0.98861	0.65091	0.86197
0.76771	0.98975	0.65113	0.86296
0.77255	0.99089	0.6516	0.86395
0.79659	0.99203	0.65219	0.86495
0.80292	0.99317	0.65323	0.86594
0.87771	0.99431	0.65423	0.86693
0.88174	0.99544	0.65431	0.86792
0.89553	0.99658	0.65522	0.86892
0.92235	0.99772	0.6558	0.86991
1.0014	0.99886	0.65622	0.8709
1.0019	1	0.6569	0.8719
		0.65692	0.87289
		0.65696	0.87388
		0.65807	0.87488
		0.65814	0.87587
		0.65815	0.87686
		0.65923	0.87786
		0.6595	0.87885
		0.65953	0.87984
		0.65979	0.88083
		0.65993	0.88183
		0.66013	0.88282
		0.66036	0.88381
		0.66176	0.88481
		0.66191	0.8858
		0.66238	0.88679
		0.66273	0.88779
		0.66341	0.88878
		0.66459	0.88977
		0.66492	0.89076
		0.6655	0.89176
		0.66568	0.89275
		0.66635	0.89374
		0.66677	0.89474
		0.66743	0.89573
		0.66757	0.89672
		0.66944	0.89772
		0.66957	0.89871
		0.66992	0.8997
		0.66994	0.9007
		0.67087	0.90169
		0.67087	0.90268
		0.67099	0.90367
		0.67199	0.90467
		0.67209	0.90566
		0.67297	0.90665
		0.67335	0.90765
		0.67404	0.90864
		0.67442	0.90963
		0.67493	0.91063
		0.67526	0.91162
		0.67563	0.91261
		0.67565	0.9136
		0.6761	0.9146
		0.67667	0.91559
		0.67823	0.91658
		0.67855	0.91758
		0.68019	0.91857
		0.68087	0.91956
		0.68123	0.92056
		0.68131	0.92155
		0.68204	0.92254
		0.68253	0.92354
		0.68254	0.92453
		0.68473	0.92552
		0.6849	0.92651
		0.68527	0.92751
		0.68548	0.9285
		0.68651	0.92949
		0.68663	0.93049
		0.68692	0.93148
		0.68702	0.93247
		0.68706	0.93347
		0.68777	0.93446
		0.68852	0.93545
		0.68869	0.93644
		0.68885	0.93744
		0.68901	0.93843
		0.68958	0.93942
		0.69017	0.94042
		0.69126	0.94141
		0.69221	0.9424
		0.6928	0.9434
		0.69342	0.94439
		0.69364	0.94538
		0.69381	0.94638
		0.69385	0.94737
		0.69399	0.94836
		0.69443	0.94935
		0.69465	0.95035
		0.69584	0.95134
		0.69635	0.95233
		0.69857	0.95333
		0.69875	0.95432
		0.69962	0.95531
		0.69997	0.95631
		0.70006	0.9573
		0.70137	0.95829
		0.70236	0.95929
		0.70334	0.96028
		0.70437	0.96127
		0.70464	0.96226
		0.70598	0.96326
		0.70743	0.96425
		0.70831	0.96524
		0.70839	0.96624
		0.70928	0.96723
		0.71103	0.96822
		0.71463	0.96922
		0.71531	0.97021
		0.71667	0.9712
		0.7172	0.97219
		0.71766	0.97319
		0.71996	0.97418
		0.72191	0.97517
		0.7248	0.97617
		0.72558	0.97716
		0.72904	0.97815
		0.72923	0.97915
		0.7369	0.98014
		0.73839	0.98113
		0.73935	0.98213
		0.75039	0.98312
		0.7557	0.98411
		0.75639	0.9851
		0.76208	0.9861
		0.76655	0.98709
		0.78043	0.98808
		0.78115	0.98908
		0.78579	0.99007
		0.78908	0.99106
		0.79776	0.99206
		0.80666	0.99305
		0.84111	0.99404
		0.84162	0.99503
		0.86367	0.99603
		0.86943	0.99702
		0.89937	0.99801
		0.90125	0.99901
		0.95231	1

## Sheet: Fig.4g
	WT		Net
Depth (Fraction of M0-M6), Bin Center	Columns (#)	Depth (Fraction of M0-M6), Bin Center	Columns (#)
0	0	0	0
0.025	0	0.025	0
0.05	0	0.05	0
0.075	0	0.075	0
0.1	0	0.1	0
0.125	0	0.125	0
0.15	0	0.15	0
0.175	0	0.175	0
0.2	0	0.2	0
0.225	0	0.225	0
0.25	0	0.25	0
0.275	0	0.275	0
0.3	0	0.3	0
0.325	0	0.325	0
0.35	0	0.35	0
0.375	0	0.375	0
0.4	0	0.4	0
0.425	0	0.425	0
0.45	0	0.45	0
0.475	0	0.475	0
0.5	0	0.5	0
0.525	0	0.525	0
0.55	0	0.55	0
0.575	0	0.575	0
0.6	14	0.6	16
0.625	121	0.625	178
0.65	201	0.65	321
0.675	146	0.675	156
0.7	44	0.7	19
0.725	8	0.725	0
0.75	1	0.75	0
0.775	0	0.775	0
0.8	0	0.8	0
0.825	0	0.825	0
0.85	0	0.85	0
0.875	0	0.875	0
0.9	0	0.9	0
0.925	0	0.925	0
0.95	0	0.95	0
0.975	0	0.975	0
1	0	1	0

## Sheet: Fig.4i
	WT		Net
Distance(um),Bin Center	R8s (#)	Distance(um),Bin Center	R8s (#)
-0.6	0	-0.6	1
-0.575	0	-0.575	8
-0.55	0	-0.55	3
-0.525	0	-0.525	5
-0.5	0	-0.5	9
-0.475	0	-0.475	9
-0.45	0	-0.45	9
-0.425	0	-0.425	10
-0.4	0	-0.4	7
-0.375	0	-0.375	6
-0.35	0	-0.35	7
-0.325	0	-0.325	6
-0.3	0	-0.3	5
-0.275	0	-0.275	7
-0.25	0	-0.25	12
-0.225	0	-0.225	19
-0.2	0	-0.2	23
-0.175	0	-0.175	49
-0.15	0	-0.15	66
-0.125	0	-0.125	67
-0.1	0	-0.1	42
-0.075	0	-0.075	53
-0.05	2	-0.05	50
-0.025	13	-0.025	47
0	51	0	78
0.025	103	0.025	36
0.05	145	0.05	27
0.075	108	0.075	7
0.1	54	0.1	10
0.125	28	0.125	2
0.15	14	0.15	1
0.175	6	0.175	2
0.2	3	0.2	1
0.225	2	0.225	1
0.25	3	0.25	0
0.275	1	0.275	0
0.3	1	0.3	0
0.325	0	0.325	1
0.35	1	0.35	1
0.375	0	0.375	1
0.4	0	0.4	0
