# Supplementary material for: Frazzled promotes growth cone attachment at the source of a Netrin gradient in the Drosophila visual system
Source: eLife. 2016 Oct 15;5:e20762. doi: 10.7554/eLife.20762 (PMC5108592; doi:10.7554/eLife.20762)
Supplement: Figure 5—figure supplement 1—source data 1. — DOI: http://dx.doi.org/10.7554/eLife.20762.021 [file elife-20762-fig5-figsupp1-data1.xls]

## Sheet: Fig.5-FS1a
Parent Plot			Inset Plot
Step Size (um), Bin Center	Steps (#)		Step Size (um), Bin Center	Steps (#)
-15	0		-15	0
-14	0		-14	0
-13	0		-13	0
-12	0		-12	0
-11	0		-11	0
-10	1		-10	1
-9	2		-9	2
-8	6		-8	6
-7	11		-7	11
-6	23		-6	23
-5	0		-5	32
-4	0		-4	66
-3	0		-3	164
-2	0		-2	377
-1	0		-1	930
0	0		0	932
1	0		1	419
2	0		2	176
3	0		3	98
4	0		4	62
5	43		5	43
6	19		6	19
7	8		7	8
8	6		8	6
9	5		9	5
10	0		10	0
11	1		11	1
12	1		12	1
13	0		13	0
14	0		14	0
15	0		15	0

## Sheet: Fig.5-FS1b
	Fast Step						Event Average
	Extension		Retraction				Extension		Retraction
	WT	fra	WT	fra			WT	fra	WT	fra
Average	0.58	0.53	-0.44	-0.48		Average	0.5	0.47	-0.33	-0.4
Std	0.22	0.17	0.15	0.18		Std	0.24	0.19	0.15	0.17

## Sheet: Fig.5-FS1c
Average R8 Reach							Trendline Scatter Plot
	WT			fra				WT		fra
Time (hAPF)	Depth (um)	Std (um)	Time (hAPF)	Depth (um)	Std (um)		Slope (um/h)	Depth at 47 hAPF (um)	Slope (um/h)	Depth at 47 hAPF (um)
39.99	1.6241	1.4981	44.99	2.8214	2.0247		0.075606	8.8796	0.10944	10.449
40.15	1.638	1.1727	45.15	2.749	2.6328		0.13167	9.0225	0.10955	9.8089
40.32	1.6423	1.0442	45.32	4.1537	2.8271		0.13303	8.7991	0.11562	9.1944
40.49	1.8131	1.0808	45.49	4.6391	2.0728		0.13478	8.9219	0.12454	10.388
40.65	2.0036	1.3062	45.65	6.4399	2.172		0.13596	9.2923	0.12474	10.058
40.82	1.8871	1.3027	45.82	5.1366	2.785		0.13647	10.136	0.12975	9.6792
40.99	2.5392	2.3754	45.99	4.7403	3.0423		0.13704	9.3047	0.13435	10.067
41.15	2.3955	2.1023	46.15	3.0245	2.9909		0.13733	9.4471	0.13529	9.977
41.32	2.5039	2.2198	46.32	5.0354	3.9676		0.1395	10.765	0.14132	9.9545
41.49	2.337	1.665	46.49	5.4761	3.1153		0.13963	9.1284	0.14262	8.7229
41.65	2.0474	1.2722	46.65	6.1743	3.3957		0.14062	10.526	0.14302	9.3698
41.82	2.1785	1.258	46.82	5.5575	3.1319		0.14073	9.7424	0.15234	10.352
41.99	2.3615	2.0786	46.99	8.0415	0.90344		0.14252	11.408	0.15568	9.9647
42.15	2.0858	1.3716	47.15	7.734	1.7837		0.14375	9.3638	0.15672	9.5013
42.32	2.402	1.3135	47.32	7.673	3.1135		0.14534	8.6788	0.15837	9.8471
42.49	2.3476	1.8396	47.49	8.0879	1.6683		0.14537	9.8164	0.16353	8.0343
42.65	2.5128	1.5464	47.65	8.2873	1.5893		0.147	10.051	0.16471	10.005
42.82	2.6467	1.9593	47.82	8.0469	1.8461		0.14842	8.7808	0.16799	10.044
42.99	2.5015	1.8389	47.99	8.9515	1.7452		0.1494	10.295	0.18045	7.6928
43.15	2.7936	2.3755	48.15	8.5574	2.2749		0.1503	10.212	0.18395	8.8194
43.32	2.8266	2.1755	48.32	8.9018	1.4693		0.15173	10.443
43.49	3.7906	3.2987	48.49	8.5282	1.7049		0.15466	9.1623
43.65	3.0337	2.7463	48.65	9.0624	1.5356		0.15566	8.819
43.82	3.1925	2.673	48.82	8.8031	0.78319		0.16193	9.7975
43.99	3.4763	2.504	48.99	9.1314	1.361		0.16256	9.8493
44.15	4.757	3.1784	49.15	8.7855	1.3348		0.1633	10.902
44.32	5.301	3.6534	49.32	8.9723	1.2058		0.16467	8.5394
44.49	7.9049	3.1367	49.49	9.365	0.87952		0.16563	8.6659
44.65	6.8162	3.484	49.65	9.188	1.3378		0.16667	10.363
44.82	6.8536	3.4931	49.82	9.6116	1.0413		0.16703	8.0048
44.99	7.6742	3.0277	49.99	9.25	1.166		0.16832	10.627
45.15	7.9665	3.057	50.15	9.2376	1.1839		0.1688	8.6267
45.32	7.8118	2.9725	50.32	9.2973	1.2959		0.17014	9.4142
45.49	8.0629	4.0384	50.49	9.9484	1.6042		0.17347	9.5724
45.65	8.4883	2.9851	50.65	9.8731	0.99804		0.18335	10.114
45.82	8.4416	3.0742	50.82	9.9017	1.2693		0.18929	9.9726
45.99	8.637	2.5159	50.99	10.184	1.1961		0.1961	9.4999
46.15	9.79	2.7658	51.15	9.9894	1.1837		0.19712	10.496
46.32	9.3042	2.1674	51.32	9.9323	1.5721		0.20247	10.86
46.49	9.7826	2.321	51.49	9.8791	1.4902		0.21394	8.9024
46.65	9.6046	2.0798	51.65	9.9374	0.97313		0.21808	10.186
46.82	9.8176	1.7751	51.82	10.271	1.2496		0.22257	9.3737
46.99	10.488	2.1608	51.99	10.098	1.3458		0.23559	8.7238
47.15	9.9898	2.109	52.15	10.18	1.5057		0.23859	8.7249
47.32	10.255	1.7747	52.32	10.517	1.0613		0.2415	9.2667
47.49	10.004	1.275	52.49	10.427	1.1301		0.24159	7.5834
47.65	10.451	1.5774	52.65	10.392	1.0991		0.24455	9.6701
47.82	10.459	1.5521	52.82	10.733	1.5684		0.25035	8.3601
47.99	10.673	1.5103	52.99	10.769	1.5336		0.29167	9.7773
48.15	11.129	1.4835	53.15	11.021	1.0211
48.32	10.892	1.8049	53.32	10.833	1.1647
48.49	10.883	1.7235	53.49	10.929	1.0635
48.65	11.021	1.7505	53.65	10.807	1.4087
48.82	10.898	1.7803	53.82	11.046	1.1094
48.99	10.917	1.5194	53.99	11.121	0.89226
49.15	11.013	1.7978	54.15	11.231	0.89184
49.32	11.045	1.4316	54.32	11.024	1.0673
49.49	10.876	1.2785	54.49	10.705	0.77454
49.65	11.154	1.4957	54.65	10.882	1.1228
49.82	11.317	1.6667	54.82	10.786	1.4584
49.99	11.334	1.5692	54.99	10.981	1.0054
50.15	11.264	1.2785	55.15	11.379	1.2164
50.32	11.545	1.5659	55.32	11.03	0.99735
50.49	11.552	1.3976	55.49	11.385	1.3802
50.65	11.34	1.3784	55.65	10.672	1.3212
50.82	11.174	1.1739	55.82	10.767	1.339
50.99	11.41	1.047	55.99	11.066	1.1205
51.15	11.314	1.1955	56.15	11.06	1.0054
51.32	11.427	1.0042	56.32	10.858	1.2799
51.49	11.399	1.2047	56.49	10.983	1.0425
51.65	11.221	1.2014	56.65	11.101	1.1934
51.82	11.491	1.2415	56.82	10.943	0.97233
51.99	11.573	1.3166	56.99	11.542	1.096
52.15	11.545	1.12	57.15	11.01	1.5094
52.32	11.573	1.379	57.32	11.347	1.2847
52.49	11.602	1.0707	57.49	11.033	1.3373
52.65	11.586	1.3155	57.65	11.089	1.3938
52.82	11.773	1.2653	57.82	10.662	1.5609
52.99	11.581	1.0322	57.99	10.886	1.2087
53.15	11.488	1.0337	58.15	10.992	1.3032
53.32	11.532	1.07	58.32	10.512	1.5885
53.49	11.819	1.2755	58.49	10.641	1.2675
53.65	11.694	1.0413	58.65	10.037	1.3532
53.82	11.816	1.0214	58.82	10.342	2.2481
53.99	11.903	1.0732	58.99	9.7748	2.1263
54.15	11.848	1.1168	59.15	9.936	2.1185
54.32	11.878	1.2577	59.32	9.6774	2.1488
54.49	11.941	1.387	59.49	9.2932	2.1524
54.65	11.973	1.4963	59.65	9.1683	2.3081
54.82	11.892	1.0817	59.82	9.0858	2.175
54.99	11.921	1.1039	59.99	8.6708	2.3116
55.15	11.99	1.1391	60.15	8.5075	1.8526
55.32	12.253	1.4517	60.32	8.3768	1.8449
55.49	12.003	1.248	60.49	8.3607	1.9562
55.65	12.159	1.2433	60.65	7.7716	2.0296
55.82	12.235	1.2871	60.82	7.5018	2.4017
55.99	12.103	1.1609	60.99	7.493	2.2157
56.15	12.053	1.3815	61.15	7.462	2.1497
56.32	12.219	1.1721	61.32	7.5436	2.2064
56.49	12.124	1.1683	61.49	7.7151	1.8439
56.65	12.121	1.2416	61.65	7.4695	1.8799
56.82	12.296	1.3065	61.82	6.9995	2.1495
56.99	12.294	1.4192
57.15	12.307	1.2421
57.32	12.299	1.2754
57.49	12.21	1.249
57.65	12.577	1.2941
57.82	12.469	1.2087
57.99	12.627	1.4389
58.15	12.855	1.2716
58.32	12.499	1.2738
58.49	12.548	1.2492
58.65	12.562	1.2893
58.82	12.689	1.3706
58.99	12.664	1.259
59.15	12.705	1.3314
59.32	12.71	1.3074
59.49	12.624	1.4122
59.65	12.631	1.3992
59.82	12.75	1.2778
59.99	12.662	1.3689
60.15	12.655	1.235
60.32	12.825	1.4075
60.49	12.923	1.3343
60.65	12.638	1.1931
60.82	13.07	1.2751
60.99	12.979	1.2804
61.15	13.12	1.3431
61.32	13.04	1.3374
61.49	13.186	1.4514
61.65	13.071	1.3803
61.82	13.103	1.6472

## Sheet: Fig.5-FS1d
Average R8 Reach							Trendline Scatter Plot
	WT			fra				WT		fra
Time (hAPF)	Depth (um)	Std (um)	Time (hAPF)	Depth (um)	Std (um)		Slope (um/h)	Depth at 47 hAPF (um)	Slope (um/h)	Depth at 47 hAPF (um)
37.94	1.7443	1.0358	37.94	2.3953	1.1736		0.16816	11.174	0.17826	13.661
38.11	2.2865	1.8054	38.11	2.7548	1.3697		0.17679	13.682	0.184	12.41
38.28	1.9901	2.0051	38.28	3.1987	2.2265		0.18419	10.171	0.18591	12.877
38.44	2.31	1.924	38.44	3.1696	1.1297		0.19016	9.6263	0.18677	9.592
38.61	2.1106	1.8918	38.61	2.9154	0.95719		0.19305	11.038	0.19335	14.884
38.78	2.0462	1.2921	38.78	2.8713	1.09		0.2	12.979	0.206	13.157
38.94	2.4087	1.7929	38.94	3.1222	1.3973		0.2	12.585	0.21075	12.379
39.11	2.22	1.8274	39.11	3.0531	1.9531		0.20646	12.992	0.21698	12.258
39.28	2.4336	2.1607	39.28	2.8599	1.2117		0.20826	11.506	0.21838	12.628
39.45	2.374	2.0236	39.45	3.0823	1.3803		0.20848	11.609	0.22066	13.066
39.61	2.2036	1.6511	39.61	3.0808	1.4047		0.20976	10.739	0.22521	13.518
39.78	2.1929	1.7353	39.78	2.9677	1.4305		0.21086	13.042	0.229	13.502
39.95	2.5029	1.8488	39.95	3.0541	1.737		0.21173	14.598	0.22908	12.917
40.11	2.0661	1.3938	40.11	2.983	1.4806		0.21319	12.7	0.23251	10.832
40.28	2.1219	1.3851	40.28	3.3501	1.4992		0.21438	11.957	0.23495	12.804
40.45	2.3113	2.0234	40.45	3.1557	1.4915		0.21667	13.805	0.24102	14.038
40.62	2.4598	2.1197	40.62	2.8762	1.1938		0.2187	11.493	0.24522	11.315
40.78	2.8829	2.834	40.78	3.3094	2.2399		0.22009	11.653	0.25358	12.868
40.95	3.1585	3.0324	40.95	3.8347	2.9452		0.22094	12.72	0.2664	13.486
41.12	2.6481	2.4532	41.12	3.5005	2.0053		0.22159	12.676	0.2745	12.487
41.29	2.4055	2.2468	41.29	3.7242	2.304		0.223	12.782	0.2795	12.38
41.45	2.5777	2.6517	41.45	3.7829	2.4715		0.22479	10.735	0.2873	10.304
41.62	2.8384	2.5741	41.62	4.1456	2.6836		0.22504	12.39	0.32164	13.442
41.79	2.6417	2.2296	41.79	3.8679	2.3077		0.22555	9.0957	0.33783	11.146
41.95	2.9321	2.4775	41.95	4.053	2.2871		0.22561	13.488	0.34966	11.033
42.12	3.3115	2.6506	42.12	4.0616	2.3164		0.22733	11.084	0.3677	12.198
42.29	3.0931	2.5901	42.29	4.6798	3.3329		0.22939	11.087	0.49226	10.447
42.46	3.2479	3.045	42.46	4.3381	2.7532		0.23414	12.618
42.62	3.3063	3.0673	42.62	4.3316	2.5353		0.23455	12.029
42.79	3.7626	3.0288	42.79	5.2556	3.0273		0.23758	12.662
42.96	3.5119	3.5483	42.96	4.7034	2.3967		0.23806	10.137
43.12	4.2137	3.9237	43.12	6.0141	2.9007		0.23936	12.631
43.29	4.2182	3.6855	43.29	6.0105	2.6198		0.24017	12.582
43.46	4.3165	3.722	43.46	5.7736	2.5236		0.24094	11.214
43.63	4.6016	3.8402	43.63	6.0661	2.986		0.24829	11.775
43.79	4.9406	3.7401	43.79	6.2262	3.2918		0.25054	11.912
43.96	5.25	3.7565	43.96	7.3827	3.2757		0.25535	12.223
44.13	5.4231	4.0817	44.13	6.9259	2.8124		0.26126	13.829
44.29	6.355	4.1062	44.29	6.7116	2.7008		0.26135	11.268
44.46	6.5694	4.2825	44.46	6.922	3.6489		0.26577	10.225
44.63	7.1973	3.9557	44.63	7.7677	3.3984		0.26616	11.091
44.8	7.4346	4.2994	44.8	7.9887	3.5165		0.26739	14.671
44.96	8.0565	4.3499	44.96	7.9439	3.5569		0.26814	13.015
45.13	9.3273	3.6569	45.13	7.3843	3.28		0.27193	11.959
45.3	9.7521	4.0953	45.3	7.9583	3.2347		0.27244	11.426
45.47	10.26	4.3812	45.47	7.8187	3.2534		0.27462	12.338
45.63	10.43	3.6059	45.63	9.2756	3.0656		0.28075	11.877
45.8	10.383	3.9098	45.8	9.4879	2.7177		0.32194	11.633
45.97	10.44	3.4309	45.97	9.2871	2.6084		0.34384	11.648
46.13	10.524	3.5299	46.13	9.741	2.9992		0.36978	12.48
46.3	11.115	3.4	46.3	9.6613	2.5988		0.37713	11.631
46.47	11.475	3.3715	46.47	9.6575	3.4129		0.37867	9.9393
46.64	11.825	2.9723	46.64	10.955	2.4981		0.395	10.889
46.8	11.586	3.141	46.8	10.539	1.7742		0.39573	10.386
46.97	12.26	2.459	46.97	10.683	2.5185		0.41208	11.753
47.14	12.342	1.7747	47.14	10.989	2.0621		0.41212	10.517
47.31	12.657	1.8135	47.31	11.131	2.256
47.47	12.776	1.6536	47.47	11.36	2.0271
47.64	13.055	1.8311	47.64	11.535	2.055
47.81	12.958	1.7465	47.81	11.609	1.7664
47.97	13.32	1.8359	47.97	11.738	2.0674
48.14	13.261	1.6757	48.14	11.617	2.3296
48.31	13.224	1.8088	48.31	11.891	2.4722
48.47	13.318	1.7854	48.47	11.672	2.1198
48.64	13.067	1.6301	48.64	11.767	2.1602
48.81	13.646	1.5894	48.81	12.305	1.8371
48.98	13.539	1.6415	48.98	12.461	1.7874
49.14	13.582	1.6009	49.14	13.195	2.0067
49.31	13.821	1.5696	49.31	12.821	1.9065
49.48	13.786	1.6299	49.48	12.94	1.9941
49.65	13.815	1.4238	49.65	13.076	2.7101
49.81	13.983	1.6196	49.81	13.197	2.4017
49.98	13.932	1.5238	49.98	13.099	1.4862
50.15	13.964	1.3557	50.15	13.136	1.6471
50.31	14.042	1.527	50.31	13.388	1.7926
50.48	14.037	1.3305	50.48	13.672	1.3416
50.65	14.009	1.3117	50.65	13.724	1.7136
50.82	13.906	1.454	50.82	13.397	1.6429
50.98	14.12	1.3317	50.98	13.606	1.3645
51.15	14.059	1.225	51.15	13.667	1.19
51.32	14.149	1.3367	51.32	13.41	1.6129
51.48	14.012	1.4204	51.48	13.146	1.576
51.65	14.018	1.3592	51.65	13.493	1.7563
51.82	14.132	1.4023	51.82	13.234	1.5681
51.99	14.19	1.4058	51.99	13.479	1.5497
52.15	14.269	1.3059	52.15	13.714	1.9285
52.32	14.536	1.3314	52.32	13.539	1.916
52.49	14.595	1.3745	52.49	13.195	2.0327
52.66	14.42	1.3093	52.66	13.857	1.5216
52.82	14.449	1.3065	52.82	13.813	1.7884
52.99	14.59	1.2812	52.99	13.767	2.4357
53.16	14.031	1.3326	53.16	12.435	2.8762
53.61	14.637	1.4033	53.61	13.499	2.4229
53.78	14.676	1.3583	53.78	13.942	1.9387
53.94	14.759	1.401	53.94	14.113	1.7169
54.11	14.773	1.4031	54.11	13.879	1.825
54.28	14.683	1.4187	54.28	13.905	1.5513
54.45	14.69	1.3712	54.45	14.034	1.8507
54.61	14.925	1.485	54.61	14.228	2.4555
54.78	14.955	1.4074	54.78	13.861	1.4433
54.95	15.12	1.3474	54.95	14.052	1.8315
55.11	15.034	1.4128	55.11	13.811	1.4138
55.28	15.287	1.2735	55.28	13.726	2.0287
55.45	15.212	1.2755	55.45	14.052	1.3209
55.61	15.399	1.2544	55.61	13.631	2.17
55.78	15.486	1.2372	55.78	13.542	2.7829
55.95	15.309	1.1539	55.95	14.57	1.6206
56.12	15.442	1.3247	56.12	14.378	1.4663
56.28	15.646	1.4381	56.28	14.468	1.8434
56.45	15.882	1.2628	56.45	13.928	1.6996
56.62	15.928	1.1372	56.62	14.244	0.9651
56.78	15.965	0.99559	56.78	14.275	1.6594
56.95	15.88	1.1718	56.95	13.556	2.2499
57.12	15.88	1.4377	57.12	13.016	2.8093
57.28	15.849	1.3978	57.28	12.141	3.0805
57.45	16.075	1.3113	57.45	11.807	3.3161
57.62	16.216	1.3492	57.62	11.379	3.3656
57.79	16.097	1.6533	57.79	10.686	3.9293
57.95	16.281	1.5817	57.95	10.774	3.5731

## Sheet: Fig.5-FS1e
	Track Start	Track Stop		Track Duration			On-Track Residence
Time (hAPF), Bin Center	Growth Cones (#)	Growth Cones (#)		Time (h), Bin Center	Growth Cones (#)		Fraction of Tracking Duration	Growth Cones (#)
40	0	0		0	0		0	0
41	0	0		1	0		0.05	0
42	0	0		2	1		0.1	0
43	2	0		3	0		0.15	1
44	6	0		4	0		0.2	6
45	11	0		5	4		0.25	7
46	14	0		6	3		0.3	11
47	15	0		7	6		0.35	14
48	18	0		8	10		0.4	9
49	11	0		9	14		0.45	10
50	9	0		10	8		0.5	8
51	8	0		11	11		0.55	9
52	0	0		12	6		0.6	7
53	1	0		13	4		0.65	10
54	0	1		14	1		0.7	2
55	0	1		15	0		0.75	1
56	0	9		16	0		0.8	0
57	0	17		17	0		0.85	0
58	0	16		18	0		0.9	0
59	0	17		19	0		0.95	0
60	0	6		20	0		1	0
61	0	1
62	0	0
63	0	0
64	0	0
65	0	0
