# Supplementary material for: Frazzled promotes growth cone attachment at the source of a Netrin gradient in the Drosophila visual system
Source: eLife. 2016 Oct 15;5:e20762. doi: 10.7554/eLife.20762 (PMC5108592; doi:10.7554/eLife.20762)
Supplement: Figure 5—source data 1. — DOI: http://dx.doi.org/10.7554/eLife.20762.019 [file elife-20762-fig5-data1.xls]

## Sheet: Fig.5c
	WT			fra
Time (hAPF)	Depth (um)	Std (um)	Time (hAPF)	Depth (um)	Std (um)
40.05	2.3975	1.3388	45.05	3.2585	1.8686
40.21	2.3372	1.3931	45.22	4.1039	2.9486
40.38	2.383	1.3663	45.38	4.1242	3.0856
40.55	2.5167	1.4012	45.55	4.6901	2.7266
40.71	2.4145	1.4422	45.72	4.4147	1.9376
40.88	2.5429	1.4929	45.88	4.669	2.4452
41.05	2.3618	1.2257	46.05	5.9396	2.6777
41.21	2.4826	1.2599	46.22	6.5238	2.9089
41.38	2.5045	1.0372	46.38	5.4005	2.7249
41.55	2.524	1.1292	46.55	5.6027	3.3287
41.71	2.5347	1.1219	46.72	6.3547	2.5458
41.88	2.4489	1.0058	46.88	6.5148	2.4077
42.05	2.5001	1.3102	47.05	6.5117	2.1937
42.21	2.191	1.0207	47.22	7.1402	2.6155
42.38	2.4385	1.4645	47.38	7.046	2.3596
42.55	2.7693	1.8882	47.55	7.5022	2.5866
42.71	2.6181	1.4795	47.72	8.044	2.0767
42.88	2.6818	1.279	47.88	7.7927	2.4818
43.05	2.5206	1.4028	48.05	8.1628	2.3936
43.21	2.4939	1.4245	48.22	8.2156	2.4694
43.38	2.833	1.6811	48.38	8.4716	2.3996
43.55	2.8339	1.7684	48.55	8.5507	2.3155
43.72	3.1431	2.202	48.72	8.4383	2.0147
43.88	3.7112	2.5981	48.88	8.8751	1.97
44.05	4.1495	2.896	49.05	9.0654	2.0455
44.22	4.5857	3.6995	49.22	9.1291	1.9448
44.38	4.6619	3.3874	49.38	9.2368	2.0658
44.55	4.2998	2.9218	49.55	9.5707	1.8391
44.72	5.6063	3.5834	49.72	9.4095	1.813
44.88	5.058	3.7042	49.88	9.4954	1.9285
45.05	6.4651	4.0004	50.05	9.2421	1.9168
45.22	6.5093	3.9286	50.22	9.552	1.8794
45.38	6.8602	3.9091	50.38	10.263	1.6782
45.55	7.2335	3.7691	50.55	10.199	1.3359
45.72	8.3285	3.7851	50.72	10.201	1.4115
45.88	8.8505	4.397	50.88	10.23	1.4753
46.05	9.2175	4.0978	51.05	10.434	1.2897
46.22	9.9155	3.9764	51.22	10.414	1.4448
46.38	9.777	3.6954	51.38	10.429	1.6354
46.55	10.189	3.7294	51.55	10.566	1.3703
46.72	10.812	3.3381	51.72	10.601	1.3767
46.88	10.916	3.2161	51.88	10.624	1.1744
47.05	10.974	2.8473	52.05	10.767	1.2994
47.22	11.045	2.8652	52.22	10.818	1.1369
47.38	11.409	3.2138	52.38	10.917	1.4421
47.55	10.848	2.7573	52.55	10.901	1.322
47.72	11.346	2.4426	52.72	11.176	1.2599
47.88	11.432	1.9586	52.88	11.125	1.2687
48.05	11.604	1.5569	53.05	10.946	1.5758
48.22	11.72	1.9971	53.22	10.942	1.4854
48.38	11.692	1.9237	53.38	11.324	1.3817
48.55	11.938	1.8835	53.55	11.43	1.2645
48.72	11.918	2.0382	53.72	11.26	1.1833
48.88	11.446	1.4215	53.88	11.395	1.2173
49.05	11.804	1.4993	54.05	11.327	1.3707
49.22	11.737	1.5174	54.22	11.443	1.3754
49.38	11.95	1.4175	54.38	11.362	1.2977
49.55	12.049	2.0083	54.55	11.283	1.3711
49.72	12.094	1.911	54.72	11.141	1.4812
49.88	12.033	1.7407	54.88	11.354	1.3327
50.05	12.005	1.9555	55.05	11.284	1.4419
50.22	12.113	2.0217	55.22	11.145	1.5346
50.38	11.922	1.7659	55.38	11.292	1.8864
50.55	11.962	1.9542	55.55	11.213	1.9676
50.72	12.154	1.9179	55.72	11.203	1.7189
50.88	12.22	1.9034	55.88	11.412	1.3613
51.05	12.189	1.4976	56.05	11.484	1.481
51.22	12.356	1.378	56.22	11.443	1.5801
51.38	12.297	1.2846	56.38	11.504	1.5308
51.55	12.349	1.1597	56.55	11.323	1.4419
51.72	12.34	1.33	56.72	11.188	1.4402
51.88	12.24	1.3315	56.88	11.096	1.2822
52.05	12.484	1.234	57.05	11.206	1.5156
52.22	12.571	1.2098	57.22	11.266	1.563
52.38	12.498	1.4621	57.38	10.893	1.4745
52.55	12.47	1.4784	57.55	10.927	1.4946
52.72	12.477	1.3572	57.72	10.8	1.4982
52.88	12.544	1.3042	57.88	10.912	1.7794
53.05	12.7	1.3739	58.05	10.763	1.8527
53.22	12.559	1.3063	58.22	10.661	1.7409
53.38	12.728	1.1744	58.38	10.569	1.5922
53.55	12.843	1.2894	58.55	10.564	2.0097
53.72	12.825	1.3991	58.71	10.354	1.798
53.88	12.87	1.471	58.88	10.096	2.1008
54.05	12.901	1.2962	59.05	10.291	1.9582
54.22	12.904	1.1843	59.22	9.897	2.221
54.38	12.879	1.2283	59.38	9.8784	2.4287
54.55	13.078	1.299	59.55	9.8576	2.401
54.72	12.87	1.1949	59.71	9.3743	2.5353
54.88	12.986	1.2797	59.88	8.9553	2.5651
55.05	13.011	1.2825	60.05	8.4995	2.4389
55.22	13.257	1.27	60.22	7.8654	2.7549
55.38	13.05	1.2029	60.38	7.702	2.9283
55.55	13.117	1.2166	60.55	7.4463	2.8335
55.72	13.246	1.2535	60.71	7.4923	2.9048
55.88	13.229	1.36	60.88	7.3666	2.7765
56.05	13.207	1.4307	61.05	7.1277	2.8676
56.22	13.258	1.2627	61.21	7.0315	3.0188
56.38	13.345	1.3913	61.38	6.8621	2.9584
56.55	13.558	1.3454	61.55	6.5083	2.7906
56.72	13.373	1.3294	61.71	6.2699	3.0529
56.88	13.436	1.3178	61.88	6.4069	3.1994
57.05	13.364	1.3125	62.05	6.3627	3.0458
57.22	13.348	1.473	62.21	6.1252	3.2377
57.38	13.375	1.3922	62.38	6.242	3.0199
57.55	13.278	1.4348	62.55	5.9499	2.9725
57.72	13.327	1.2879	62.72	5.9491	3.0777
57.88	13.386	1.4442	62.88	6.0091	2.8607
58.05	13.462	1.3862
58.22	13.349	1.3898
58.38	13.565	1.4869
58.55	13.616	1.6475
58.71	13.512	1.401
58.88	13.677	1.517
59.05	13.736	1.5475
59.22	13.753	1.5263
59.38	13.722	1.4581
59.55	13.828	1.4406
59.71	13.829	1.5888
59.88	13.98	1.6217
60.05	13.968	1.6148
60.22	13.931	1.5975
60.38	14.209	1.5544
60.55	14.186	1.5543
60.71	14.16	1.715
60.88	14.256	1.6566
61.05	14.311	1.7087
61.21	14.334	1.8191
61.38	14.388	1.7816
61.55	14.313	1.6958
61.71	14.375	1.7155
61.88	14.293	1.7809
62.05	14.325	1.8537
62.21	14.508	1.8226
62.38	14.714	1.9864
62.55	14.742	1.7158
62.72	14.672	1.8671
62.88	14.685	1.8675

## Sheet: Fig.5d
Parent Plot			Inset Plot
Step Size (um), Bin Center	Steps (#)		Step Size (um), Bin Center	Steps (#)
-15	0		-15	0
-14	0		-14	0
-13	0		-13	0
-12	0		-12	0
-11	1		-11	1
-10	1		-10	1
-9	2		-9	2
-8	5		-8	5
-7	6		-7	6
-6	15		-6	15
-5	0		-5	28
-4	0		-4	52
-3	0		-3	80
-2	0		-2	174
-1	0		-1	408
0	0		0	440
1	0		1	203
2	0		2	81
3	0		3	60
4	0		4	36
5	27		5	27
6	11		6	11
7	8		7	8
8	2		8	2
9	2		9	2
10	1		10	1
11	0		11	0
12	0		12	0
13	0		13	0
14	0		14	0
15	0		15	0

## Sheet: Fig.5e
Time (hAPF), Bin Center	Growth Cones (#)
41	0
41.5	0
42	0
42.5	0
43	0
43.5	0
44	0
44.5	0
45	0
45.5	6
46	8
46.5	15
47	18
47.5	20
48	8
48.5	4
49	9
49.5	2
50	3
50.5	2
51	0
51.5	1
52	1
52.5	0
53	0
53.5	0
54	0
54.5	0
55	0
55.5	0
56	0
56.5	0
57	0
57.5	0
58	0
58.5	0
59	0

## Sheet: Fig.5h
	Data		Target layer fit
Time (hAPF)	Depth (um)	Time (hAPF)	Depth (um)
40.05	1.6731	40.05	9.9211
40.21	1.6715	40.21	9.947
40.38	1.9212	40.38	9.9746
40.55	2.7534	40.55	10.002
40.71	1.6519	40.71	10.028
40.88	3.5647	40.88	10.056
41.05	4.118	41.05	10.083
41.21	1.5866	41.21	10.109
41.38	1.0407	41.38	10.137
41.55	2.1608	41.55	10.164
41.71	1.8924	41.71	10.19
41.88	2.7093	41.88	10.218
42.05	2.4359	42.05	10.245
42.21	2.9774	42.21	10.271
42.38	6.6897	42.38	10.299
42.55	2.1319	42.55	10.326
42.71	1.5819	42.71	10.352
42.88	2.9847	42.88	10.38
43.05	3.5483	43.05	10.407
43.21	1.8161	43.21	10.433
43.38	2.681	43.38	10.461
43.55	1.8117	43.55	10.488
43.72	1.4783	43.72	10.516
43.88	4.118	43.88	10.542
44.05	1.7918	44.05	10.569
44.22	0.92802	44.22	10.597
44.38	1.8108	44.38	10.623
44.55	2.0912	44.55	10.65
45.55	9.137	44.72	10.678
45.72	10.01	44.88	10.704
45.88	11.286	45.05	10.731
46.05	11.483	45.22	10.759
46.22	12.694	45.38	10.785
46.38	10.008	45.55	10.812
46.55	10.058	45.72	10.84
46.72	11.863	45.88	10.866
46.88	11.893	46.05	10.893
47.05	10.401	46.22	10.921
47.22	11.245	46.38	10.947
47.38	11.038	46.55	10.974
47.55	11.623	46.72	11.002
47.72	10.16	46.88	11.028
47.88	12.625	47.05	11.055
48.05	11.671	47.22	11.083
48.22	13.134	47.38	11.109
48.38	11.05	47.55	11.136
48.55	11.104	47.72	11.164
48.72	11.022	47.88	11.19
48.88	11.426	48.05	11.217
49.05	11.688	48.22	11.245
49.22	11.677	48.38	11.271
49.38	12.584	48.55	11.298
49.55	13.811	48.72	11.326
49.72	12.793	48.88	11.352
49.88	12.147	49.05	11.379
50.05	12.211	49.22	11.407
50.22	11.636	49.38	11.433
50.38	11.28	49.55	11.46
50.55	11.331	49.72	11.488
50.72	14.963	49.88	11.514
50.88	12.567	50.05	11.541
51.05	11.944	50.22	11.569
51.22	12.838	50.38	11.595
51.38	12.238	50.55	11.622
51.55	13.41	50.72	11.65
51.72	12.875	50.88	11.676
51.88	11.62	51.05	11.703
52.05	12.006	51.22	11.731
52.22	12.01	51.38	11.757
52.38	12.252	51.55	11.784
52.55	12.241	51.72	11.812
52.72	12.292	51.88	11.838
52.88	11.952	52.05	11.865
53.05	12.221	52.22	11.893
53.22	12.416	52.38	11.919
53.38	12.737	52.55	11.946
53.55	13.338	52.72	11.974
53.72	12.706	52.88	12
53.88	12.749	53.05	12.027
54.05	12.113	53.22	12.055
54.22	12.086	53.38	12.081
54.38	13	53.55	12.108
54.55	14.09	53.72	12.136
54.72	14.389	53.88	12.162
54.88	14.616	54.05	12.189
55.05	13.028	54.22	12.217
55.22	12.741	54.38	12.243
55.38	12.384	54.55	12.27
55.55	12.341	54.72	12.298
55.72	13.462	54.88	12.324
55.88	13.202	55.05	12.351
56.05	12.347	55.22	12.379
56.22	12.306	55.38	12.405
56.38	12.21	55.55	12.432
56.55	13.394	55.72	12.46
56.72	14.289	55.88	12.486
56.88	15.663	56.05	12.513
57.05	12.336	56.22	12.541
57.22	12.582	56.38	12.567
57.38	13.83	56.55	12.594
57.55	13.218	56.72	12.622
57.72	12.408	56.88	12.648
57.88	12.334	57.05	12.675
58.05	12.575	57.22	12.703
58.22	13.275	57.38	12.729
58.38	13.496	57.55	12.756
58.55	13.085	57.72	12.784
58.71	12.868	57.88	12.81
58.88	13.606	58.05	12.837
59.05	13.855	58.22	12.865
59.22	14.091	58.38	12.891
59.38	13.464	58.55	12.918
59.55	13.468	58.71	12.944
59.71	13.554	58.88	12.972
59.88	14.01	59.05	12.999
60.05	14.483	59.22	13.027
60.22	14.96	59.38	13.053
60.38	14.808	59.55	13.08
60.55	13.928	59.71	13.106
60.71	13.445	59.88	13.134
60.88	14.582	60.05	13.161
61.05	14.066	60.22	13.189
61.21	14.646	60.38	13.215
61.38	14.586	60.55	13.242
61.55	13.721	60.71	13.268
61.71	14.327	60.88	13.296
61.88	13.717	61.05	13.323
62.05	13.967	61.21	13.349
62.21	13.706	61.38	13.377
62.38	13.517	61.55	13.404
62.55	13.987	61.71	13.43
62.72	13.706	61.88	13.458
62.88	14.567	62.05	13.485
		62.21	13.511
		62.38	13.539
		62.55	13.566
		62.72	13.594
		62.88	13.62

## Sheet: Fig.5i
	Data		Track line fit
Time (hAPF)	Depth (um)	Time (hAPF)	Depth (um)
45.05	5.5077	45.05	9.6652
45.22	5.5074	45.22	9.6999
45.38	4.9481	45.38	9.7325
45.55	6.6209	45.55	9.7672
45.72	3.5625	45.72	9.8019
45.88	1.3399	45.88	9.8345
46.05	3.5628	46.05	9.8692
46.22	2.7062	46.22	9.9039
46.38	3.5542	46.38	9.9365
46.55	7.7791	46.55	9.9712
46.72	8.9556	46.72	10.006
46.88	7.8046	46.88	10.039
47.05	9.8153	47.05	10.073
47.22	9.2395	47.22	10.108
47.38	8.9676	47.38	10.141
47.55	7.25	47.55	10.175
47.72	9.5837	47.72	10.21
47.88	8.1276	47.88	10.243
48.05	9.2682	48.05	10.277
48.22	8.9436	48.22	10.312
48.38	8.9775	48.38	10.345
48.55	10.427	48.55	10.379
48.72	8.4289	48.72	10.414
48.88	10.165	48.88	10.447
49.05	10.198	49.05	10.481
49.22	9.6093	49.22	10.516
49.38	9.9667	49.38	10.549
49.55	9.3436	49.55	10.583
49.72	10.226	49.72	10.618
49.88	10.485	49.88	10.651
50.05	9.6871	50.05	10.685
50.22	10.549	50.22	10.72
50.38	11.094	50.38	10.753
50.55	10.535	50.55	10.787
50.72	11.169	50.72	10.822
50.88	10.555	50.88	10.855
51.05	10.828	51.05	10.889
51.22	9.9355	51.22	10.924
51.38	9.932	51.38	10.957
51.55	10.232	51.55	10.991
51.72	9.9817	51.72	11.026
51.88	10.514	51.88	11.059
52.05	10.3	52.05	11.093
52.22	9.8755	52.22	11.128
52.38	9.9425	52.38	11.161
52.55	11.344	52.55	11.195
52.72	9.9179	52.72	11.23
52.88	10.803	52.88	11.263
53.05	10.772	53.05	11.297
53.22	11.016	53.22	11.332
53.38	11.254	53.38	11.365
53.55	10.726	53.55	11.399
53.72	9.8748	53.72	11.434
53.88	10.996	53.88	11.467
54.05	10.676	54.05	11.501
54.22	10.978	54.22	11.536
54.38	10.733	54.38	11.569
54.55	11.573	54.55	11.603
54.72	10.744	54.72	11.638
54.88	11.211	54.88	11.671
55.05	10.158	55.05	11.705
55.22	11.297	55.22	11.74
55.38	10.712	55.38	11.773
55.55	10.894	55.55	11.807
55.72	10.899	55.72	11.842
55.88	11.46	55.88	11.875
56.05	12.362	56.05	11.909
56.22	12.296	56.22	11.944
56.38	12.298	56.38	11.977
56.55	11.75	56.55	12.011
56.72	12.277	56.72	12.046
56.88	11.447	56.88	12.079
57.05	11.722	57.05	12.113
57.22	11.459	57.22	12.148
57.38	9.5699	57.38	12.181
57.55	10.432	57.55	12.215
57.72	9.2997	57.72	12.25
57.88	10.701	57.88	12.283
58.05	10.359	58.05	12.317
58.22	10.391	58.22	12.352
58.38	10.729	58.38	12.385
58.55	11.215	58.55	12.419
58.71	12.13	58.71	12.452
58.88	9.8167	58.88	12.487
59.05	9.9263	59.05	12.521
59.22	8.768	59.22	12.556
59.38	9.0384	59.38	12.589
59.55	8.8124	59.55	12.623
59.71	8.2836	59.71	12.656
59.88	8.1888	59.88	12.691
60.05	7.882	60.05	12.725
60.22	7.4234	60.22	12.76
60.38	9.0912	60.38	12.793
60.55	7.3422	60.55	12.827
60.71	9.1229	60.71	12.86
60.88	7.9397	60.88	12.895
61.05	7.65	61.05	12.929
61.21	10.869	61.21	12.962
61.38	10.81	61.38	12.997
61.55	7.0784	61.55	13.031
61.71	6.782	61.71	13.064
61.88	6.7657	61.88	13.099
62.05	7.3644	62.05	13.133
62.21	7.9439	62.21	13.166
62.38	7.9429	62.38	13.201
62.55	7.0438	62.55	13.235
62.72	5.5991	62.72	13.27
62.88	5.8635	62.88	13.303

## Sheet: Fig.5j
	WT		fra
Slope (um/h)	Depth at 47 hAPF (um)	Slope (um/h)	Depth at 47 hAPF (um)
0.058938	9.1081	0.07	11.236
0.1396	10.511	0.077211	10.29
0.141	10.188	0.1062	9.5214
0.14588	9.5708	0.11742	10.053
0.15727	8.7733	0.11837	10.449
0.15785	9.2639	0.14142	9.6738
0.16186	10.717	0.15636	7.8723
0.16618	10.15	0.1584	12.172
0.17116	8.6719	0.1609	11.673
0.17266	10.779	0.16315	10.435
0.18877	9.9892	0.16638	10.073
0.19088	10.64	0.16681	10.197
0.19239	10.484	0.16707	9.9394
0.19299	7.305	0.16731	10.831
0.19467	10.011	0.17171	9.6452
0.19547	9.8571	0.17243	8.9407
0.19857	9.4797	0.18535	9.4391
0.19874	6.8651	0.18816	10.011
0.19959	9.4419	0.19026	9.9868
0.19978	10.474	0.19054	9.0859
0.19984	9.8659	0.19303	9.78
0.2	9.6206	0.1964	11.166
0.20017	11.336	0.2026	9.8811
0.2011	10.165	0.20408	9.6592
0.20137	10.427	0.20444	11.764
0.2024	11.995	0.21078	8.8759
0.20307	11.269	0.21128	9.0213
0.20543	11.362	0.21184	10.299
0.20592	11.757	0.21267	10.02
0.20866	12.542	0.21571	9.7804
0.20878	10.459	0.22103	9.0449
0.21083	10.783	0.2238	8.0418
0.21095	11.17	0.22644	10.553
0.21181	9.7104	0.22779	9.8668
0.21194	9.8781	0.22879	9.9887
0.21243	10.395	0.23442	9.9954
0.21377	9.4362	0.2361	10.57
0.21515	11.252	0.23619	9.0408
0.21705	10.311	0.23677	9.9008
0.21829	10.219	0.23813	11.195
0.21877	10.264	0.24548	7.8108
0.21911	11.22	0.2461	9.959
0.2201	10.092	0.24787	11.008
0.22125	10.622	0.25067	9.3946
0.2224	10.495	0.2556	9.4146
0.22254	9.2226	0.25584	8.9472
0.22256	11.172	0.28654	10.286
0.22864	10.136	0.31429	8.0019
0.2301	9.948
0.23279	10.349
0.23287	10.385
0.23329	9.9938
0.23788	9.6002
0.24134	10.849
0.2505	11.744
0.25279	10.128
0.25355	10.844
0.26065	11.534
0.26316	11.89
0.26617	8.5181
0.281	9.7287
0.29619	8.5335
0.32006	9.1478
0.33474	11.524
0.34207	10.083
0.35	10.524
0.37548	9.8539
