# Supplementary material for: Frazzled promotes growth cone attachment at the source of a Netrin gradient in the Drosophila visual system
Source: eLife. 2016 Oct 15;5:e20762. doi: 10.7554/eLife.20762 (PMC5108592; doi:10.7554/eLife.20762)
Supplement: Figure 6—source data 1. — DOI: http://dx.doi.org/10.7554/eLife.20762.026 [file elife-20762-fig6-data1.xls]

## Sheet: Fig.6b
	Net			fra
Time (hAPF)	Depth (um)	Std (um)	Time (hAPF)	Depth (um)	Std (um)
38.08	2.0431	2.1677	45.05	3.2585	1.8686
38.24	1.9903	1.6703	45.22	4.1039	2.9486
38.41	1.917	1.5691	45.38	4.1242	3.0856
38.58	1.8967	1.503	45.55	4.6901	2.7266
38.75	1.8661	1.4947	45.72	4.4147	1.9376
38.91	1.9645	1.8535	45.88	4.669	2.4452
39.08	2.113	1.7284	46.05	5.9396	2.6777
39.25	1.886	1.7339	46.22	6.5238	2.9089
39.41	1.7911	1.7545	46.38	5.4005	2.7249
39.58	1.8334	1.6925	46.55	5.6027	3.3287
39.74	1.9019	1.7358	46.72	6.3547	2.5458
39.91	1.7975	1.5234	46.88	6.5148	2.4077
40.08	1.6712	1.6084	47.05	6.5117	2.1937
40.25	1.7093	1.3667	47.22	7.1402	2.6155
40.41	1.686	1.4569	47.38	7.046	2.3596
40.58	2.1525	1.8835	47.55	7.5022	2.5866
40.75	1.9918	1.6883	47.72	8.044	2.0767
40.92	1.899	1.6603	47.88	7.7927	2.4818
41.09	2.0461	1.8236	48.05	8.1628	2.3936
41.25	2.1072	1.765	48.22	8.2156	2.4694
41.42	1.8913	1.825	48.38	8.4716	2.3996
41.59	1.5038	1.548	48.55	8.5507	2.3155
41.59	1.6509	1.5826	48.72	8.4383	2.0147
41.76	2.1173	2.0849	48.88	8.8751	1.97
41.93	2.247	1.959	49.05	9.0654	2.0455
42.09	2.3085	1.9791	49.22	9.1291	1.9448
42.26	2.1879	1.7054	49.38	9.2368	2.0658
42.43	2.1922	1.6178	49.55	9.5707	1.8391
42.6	2.4773	1.8558	49.72	9.4095	1.813
42.77	2.5573	2.2687	49.88	9.4954	1.9285
42.93	2.5726	2.3509	50.05	9.2421	1.9168
43.1	2.6255	2.265	50.22	9.552	1.8794
43.27	3.017	2.6294	50.38	10.263	1.6782
43.44	3.1698	2.7122	50.55	10.199	1.3359
43.61	3.346	2.4675	50.72	10.201	1.4115
43.77	3.5048	2.8295	50.88	10.23	1.4753
43.94	3.5104	2.6932	51.05	10.434	1.2897
44.11	3.6783	2.805	51.22	10.414	1.4448
44.28	3.8068	2.521	51.38	10.429	1.6354
44.45	3.9479	2.5507	51.55	10.566	1.3703
44.61	3.7506	2.4243	51.72	10.601	1.3767
44.78	4.251	2.4889	51.88	10.624	1.1744
44.95	4.3881	2.4996	52.05	10.767	1.2994
45.12	4.6657	2.6303	52.22	10.818	1.1369
45.29	4.9748	2.6403	52.38	10.917	1.4421
45.45	5.1648	2.7929	52.55	10.901	1.322
45.62	5.5244	2.8755	52.72	11.176	1.2599
45.79	5.6663	2.836	52.88	11.125	1.2687
45.96	5.774	2.7326	53.05	10.946	1.5758
46.13	5.9767	2.5193	53.22	10.942	1.4854
46.29	6.2242	2.6019	53.38	11.324	1.3817
46.46	6.3351	2.6234	53.55	11.43	1.2645
46.63	6.5374	2.8027	53.72	11.26	1.1833
46.8	6.733	2.6867	53.88	11.395	1.2173
46.97	7.0386	2.5099	54.05	11.327	1.3707
47.14	7.5215	2.6786	54.22	11.443	1.3754
47.3	7.5406	2.3692	54.38	11.362	1.2977
47.47	7.4928	2.4186	54.55	11.283	1.3711
47.64	7.5902	2.4391	54.72	11.141	1.4812
47.81	7.7098	2.5117	54.88	11.354	1.3327
47.97	8.0018	2.5721
48.14	8.2936	2.5991
48.31	8.3194	2.3639
48.48	8.3975	2.4354
48.65	8.5484	2.2673
48.81	8.8202	2.4808
48.98	8.8879	2.3051
49.15	9.1056	2.3619
49.32	9.2698	2.1041
49.49	9.2927	2.0324
49.66	9.7402	2.1073
49.82	9.7185	2.2967
49.99	9.7225	2.2234
50.16	9.6883	1.9027
50.33	9.9658	2.1063
50.5	10.221	1.8797
50.66	10.45	1.6942
50.83	10.312	1.7886
51	10.401	1.7824
51.17	10.423	1.7332
51.33	10.807	1.7993
51.5	10.755	1.7706
51.67	10.744	1.8739
51.84	10.811	1.7665
52.01	10.901	1.7166
52.17	10.867	1.7656
52.34	10.819	1.6422
52.51	10.839	1.6031
52.68	11.042	1.5334
52.85	11.09	1.5434
53.02	11.154	1.514
53.18	11.291	1.5599
53.35	11.345	1.6275
53.52	11.469	1.731
53.69	11.512	1.5141
53.86	11.593	1.6262
54.02	11.756	1.636
54.19	11.811	1.6642
54.36	11.494	1.5334
54.53	11.607	1.4343
54.7	11.65	1.6121
54.86	11.762	1.4347

## Sheet: Fig.6c
Parent Plot			Inset Plot
Step Size (um), Bin Center	Steps (#)		Step Size (um), Bin Center	Steps (#)
-15	0		-15	0
-14	0		-14	0
-13	0		-13	0
-12	0		-12	0
-11	1		-11	1
-10	0		-10	0
-9	2		-9	2
-8	5		-8	5
-7	14		-7	14
-6	38		-6	38
-5	0		-5	94
-4	0		-4	189
-3	0		-3	387
-2	0		-2	887
-1	0		-1	2195
0	0		0	2243
1	0		1	937
2	0		2	378
3	0		3	248
4	0		4	124
5	65		5	65
6	21		6	21
7	19		7	19
8	5		8	5
9	3		9	3
10	0		10	0
11	0		11	0
12	0		12	0
13	0		13	0
14	0		14	0
15	0		15	0

## Sheet: Fig.6d
Time (hAPF), Bin Center	Growth Cones (#)
41	0
41.5	0
42	0
42.5	0
43	0
43.5	0
44	0
44.5	1
45	1
45.5	3
46	7
46.5	3
47	5
47.5	4
48	7
48.5	8
49	2
49.5	5
50	3
50.5	0
51	0
