# Supplementary material for: Frazzled promotes growth cone attachment at the source of a Netrin gradient in the Drosophila visual system
Source: eLife. 2016 Oct 15;5:e20762. doi: 10.7554/eLife.20762 (PMC5108592; doi:10.7554/eLife.20762)
Supplement: Figure 7—source data 1. — DOI: http://dx.doi.org/10.7554/eLife.20762.028 [file elife-20762-fig7-data1.xls]

## Sheet: Fig.7a
Depth (Fraction of M0-M6), Bin Center	R8s (#)
0	0
0.025	0
0.05	0
0.075	0
0.1	0
0.125	0
0.15	0
0.175	0
0.2	0
0.225	0
0.25	0
0.275	0
0.3	0
0.325	0
0.35	0
0.375	0
0.4	0
0.425	0
0.45	0
0.475	0
0.5	0
0.525	0
0.55	0
0.575	0
0.6	1
0.625	9
0.65	34
0.675	62
0.7	113
0.725	97
0.75	70
0.775	46
0.8	32
0.825	21
0.85	9
0.875	5
0.9	2
0.925	1
0.95	0
0.975	1
1	0

## Sheet: Fig.7b
Depth (Fraction of M0-M6), Bin Center	R8s (#)
0	4
0.025	7
0.05	23
0.075	38
0.1	60
0.125	26
0.15	36
0.175	27
0.2	22
0.225	15
0.25	22
0.275	18
0.3	11
0.325	14
0.35	10
0.375	7
0.4	15
0.425	25
0.45	30
0.475	41
0.5	57
0.525	51
0.55	47
0.575	46
0.6	60
0.625	67
0.65	49
0.675	33
0.7	19
0.725	3
0.75	1
0.775	3
0.8	0
0.825	1
0.85	0
0.875	0
0.9	0
0.925	0
0.95	0
0.975	0
1	0

## Sheet: Fig.7c
Depth (Fraction of M0-M6), Bin Center	R8s (#)
0	1
0.025	4
0.05	9
0.075	20
0.1	13
0.125	25
0.15	24
0.175	19
0.2	16
0.225	7
0.25	9
0.275	12
0.3	2
0.325	7
0.35	3
0.375	4
0.4	11
0.425	12
0.45	18
0.475	21
0.5	35
0.525	24
0.55	28
0.575	32
0.6	34
0.625	42
0.65	27
0.675	18
0.7	10
0.725	6
0.75	5
0.775	3
0.8	1
0.825	1
0.85	0
0.875	0
0.9	1
0.925	0
0.95	0
0.975	0
1	0

## Sheet: Fig.7d
Depth (Fraction of M0-M6), Bin Center	R8s (#)
0	2
0.025	2
0.05	14
0.075	21
0.1	29
0.125	22
0.15	13
0.175	16
0.2	19
0.225	15
0.25	8
0.275	8
0.3	5
0.325	6
0.35	5
0.375	8
0.4	16
0.425	11
0.45	24
0.475	34
0.5	25
0.525	28
0.55	27
0.575	31
0.6	40
0.625	39
0.65	34
0.675	19
0.7	7
0.725	7
0.75	4
0.775	0
0.8	0
0.825	1
0.85	0
0.875	0
0.9	0
0.925	0
0.95	0
0.975	0
1	0

## Sheet: Fig.7e
	Trim9null		Trim9null+FraRNAi
Depth (Fraction of M0-M6)	Fraction of R8 population	Depth (Fraction of M0-M6)	Fraction of R8 population
0.0015957	0	0.0022303	0
0.0015957	0.0011261	0.0022303	0.0018519
0.0035954	0.0022523	0.0079895	0.0037037
0.0063679	0.0033784	0.034694	0.0055556
0.0096519	0.0045045	0.03674	0.0074074
0.01435	0.0056306	0.04032	0.0092593
0.023694	0.0067568	0.042564	0.011111
0.02429	0.0078829	0.044015	0.012963
0.024401	0.009009	0.045722	0.014815
0.025231	0.010135	0.048907	0.016667
0.025591	0.011261	0.051061	0.018519
0.036759	0.012387	0.0568	0.02037
0.038263	0.013514	0.05892	0.022222
0.040262	0.01464	0.05918	0.024074
0.040716	0.015766	0.059319	0.025926
0.04132	0.016892	0.059585	0.027778
0.042621	0.018018	0.059788	0.02963
0.043352	0.019144	0.060281	0.031481
0.046039	0.02027	0.061398	0.033333
0.048562	0.021396	0.065148	0.035185
0.048779	0.022523	0.06746	0.037037
0.050004	0.023649	0.068535	0.038889
0.05156	0.024775	0.068641	0.040741
0.051591	0.025901	0.069251	0.042593
0.056038	0.027027	0.070609	0.044444
0.056344	0.028153	0.070625	0.046296
0.056981	0.029279	0.072092	0.048148
0.057353	0.030405	0.073255	0.05
0.057531	0.031532	0.07495	0.051852
0.057664	0.032658	0.075569	0.053704
0.058695	0.033784	0.078101	0.055556
0.059298	0.03491	0.080444	0.057407
0.059973	0.036036	0.081884	0.059259
0.060384	0.037162	0.082729	0.061111
0.06044	0.038288	0.083086	0.062963
0.063123	0.039414	0.083116	0.064815
0.063677	0.040541	0.084788	0.066667
0.064662	0.041667	0.086361	0.068519
0.064893	0.042793	0.08648	0.07037
0.065193	0.043919	0.086646	0.072222
0.065398	0.045045	0.087829	0.074074
0.066493	0.046171	0.088058	0.075926
0.067061	0.047297	0.090496	0.077778
0.067845	0.048423	0.091036	0.07963
0.06843	0.04955	0.092989	0.081481
0.069727	0.050676	0.093263	0.083333
0.070025	0.051802	0.093651	0.085185
0.070283	0.052928	0.094281	0.087037
0.073025	0.054054	0.094552	0.088889
0.073392	0.05518	0.094937	0.090741
0.074034	0.056306	0.096214	0.092593
0.076163	0.057432	0.096274	0.094444
0.077014	0.058559	0.096691	0.096296
0.077875	0.059685	0.096744	0.098148
0.077948	0.060811	0.096773	0.1
0.079455	0.061937	0.097396	0.10185
0.079679	0.063063	0.098394	0.1037
0.08034	0.064189	0.099614	0.10556
0.081149	0.065315	0.10049	0.10741
0.081427	0.066441	0.10253	0.10926
0.081449	0.067568	0.10529	0.11111
0.081773	0.068694	0.10583	0.11296
0.0822	0.06982	0.10599	0.11481
0.082303	0.070946	0.10608	0.11667
0.083165	0.072072	0.10738	0.11852
0.083311	0.073198	0.10783	0.12037
0.083878	0.074324	0.11048	0.12222
0.084962	0.07545	0.11108	0.12407
0.085272	0.076577	0.11239	0.12593
0.086286	0.077703	0.11301	0.12778
0.08687	0.078829	0.11537	0.12963
0.087173	0.079955	0.11573	0.13148
0.087174	0.081081	0.11927	0.13333
0.088008	0.082207	0.11973	0.13519
0.088489	0.083333	0.12035	0.13704
0.088664	0.084459	0.12036	0.13889
0.089287	0.085586	0.12178	0.14074
0.089438	0.086712	0.12306	0.14259
0.089746	0.087838	0.12348	0.14444
0.089997	0.088964	0.12464	0.1463
0.090016	0.09009	0.12493	0.14815
0.09006	0.091216	0.12791	0.15
0.091246	0.092342	0.13003	0.15185
0.091468	0.093468	0.1317	0.1537
0.091504	0.094595	0.13205	0.15556
0.091507	0.095721	0.13302	0.15741
0.091723	0.096847	0.13358	0.15926
0.092277	0.097973	0.13363	0.16111
0.09268	0.099099	0.13409	0.16296
0.092843	0.10023	0.13441	0.16481
0.092872	0.10135	0.13659	0.16667
0.093247	0.10248	0.13919	0.16852
0.09371	0.1036	0.13925	0.17037
0.094378	0.10473	0.13966	0.17222
0.094834	0.10586	0.13983	0.17407
0.096447	0.10698	0.14059	0.17593
0.096641	0.10811	0.14194	0.17778
0.0968	0.10923	0.14217	0.17963
0.097034	0.11036	0.1477	0.18148
0.097066	0.11149	0.1484	0.18333
0.097103	0.11261	0.1507	0.18519
0.097124	0.11374	0.15408	0.18704
0.097746	0.11486	0.15855	0.18889
0.097787	0.11599	0.15889	0.19074
0.09816	0.11712	0.1631	0.19259
0.10071	0.11824	0.16646	0.19444
0.10265	0.11937	0.16778	0.1963
0.10289	0.1205	0.16846	0.19815
0.10296	0.12162	0.16967	0.2
0.10313	0.12275	0.17095	0.20185
0.10364	0.12387	0.17269	0.2037
0.10368	0.125	0.17566	0.20556
0.10375	0.12613	0.17632	0.20741
0.10405	0.12725	0.17818	0.20926
0.10574	0.12838	0.17992	0.21111
0.10587	0.1295	0.18153	0.21296
0.10626	0.13063	0.18238	0.21481
0.10628	0.13176	0.18306	0.21667
0.10654	0.13288	0.18314	0.21852
0.10699	0.13401	0.18398	0.22037
0.10758	0.13514	0.18765	0.22222
0.10759	0.13626	0.18827	0.22407
0.10773	0.13739	0.18893	0.22593
0.10774	0.13851	0.18993	0.22778
0.10775	0.13964	0.19021	0.22963
0.10809	0.14077	0.1913	0.23148
0.10817	0.14189	0.19325	0.23333
0.10843	0.14302	0.19626	0.23519
0.10869	0.14414	0.20331	0.23704
0.11039	0.14527	0.20386	0.23889
0.1119	0.1464	0.20386	0.24074
0.11194	0.14752	0.20512	0.24259
0.11204	0.14865	0.20549	0.24444
0.11381	0.14977	0.20555	0.2463
0.11543	0.1509	0.20636	0.24815
0.11547	0.15203	0.20643	0.25
0.11734	0.15315	0.20749	0.25185
0.11905	0.15428	0.20812	0.2537
0.11932	0.15541	0.21023	0.25556
0.12002	0.15653	0.21453	0.25741
0.12195	0.15766	0.21547	0.25926
0.1257	0.15878	0.21659	0.26111
0.12601	0.15991	0.21755	0.26296
0.12613	0.16104	0.22158	0.26481
0.12661	0.16216	0.22686	0.26667
0.12808	0.16329	0.22791	0.26852
0.1287	0.16441	0.22944	0.27037
0.12908	0.16554	0.2305	0.27222
0.12987	0.16667	0.23196	0.27407
0.13016	0.16779	0.23221	0.27593
0.13046	0.16892	0.23263	0.27778
0.13056	0.17005	0.23299	0.27963
0.13362	0.17117	0.23301	0.28148
0.13377	0.1723	0.23357	0.28333
0.13451	0.17342	0.24574	0.28519
0.13493	0.17455	0.24638	0.28704
0.13535	0.17568	0.24949	0.28889
0.13698	0.1768	0.25374	0.29074
0.13721	0.17793	0.25677	0.29259
0.13997	0.17905	0.25825	0.29444
0.14013	0.18018	0.25991	0.2963
0.14017	0.18131	0.26033	0.29815
0.14048	0.18243	0.26693	0.3
0.14102	0.18356	0.26774	0.30185
0.14157	0.18468	0.26811	0.3037
0.14235	0.18581	0.27193	0.30556
0.14243	0.18694	0.27275	0.30741
0.14264	0.18806	0.27289	0.30926
0.14269	0.18919	0.27868	0.31111
0.14402	0.19032	0.28509	0.31296
0.14446	0.19144	0.29515	0.31481
0.14628	0.19257	0.30098	0.31667
0.14722	0.19369	0.30107	0.31852
0.14923	0.19482	0.30161	0.32037
0.14988	0.19595	0.31022	0.32222
0.15085	0.19707	0.31423	0.32407
0.15141	0.1982	0.32212	0.32593
0.15186	0.19932	0.32349	0.32778
0.15251	0.20045	0.32886	0.32963
0.15266	0.20158	0.33112	0.33148
0.154	0.2027	0.33651	0.33333
0.15411	0.20383	0.34275	0.33519
0.15441	0.20495	0.34328	0.33704
0.15615	0.20608	0.35616	0.33889
0.15657	0.20721	0.35701	0.34074
0.15671	0.20833	0.35893	0.34259
0.15762	0.20946	0.36762	0.34444
0.15784	0.21059	0.37255	0.3463
0.15831	0.21171	0.37326	0.34815
0.15957	0.21284	0.37557	0.35
0.15963	0.21396	0.37643	0.35185
0.16084	0.21509	0.37748	0.3537
0.16085	0.21622	0.38168	0.35556
0.1615	0.21734	0.38462	0.35741
0.16212	0.21847	0.3902	0.35926
0.16264	0.21959	0.39069	0.36111
0.16303	0.22072	0.39124	0.36296
0.16368	0.22185	0.39134	0.36481
0.16391	0.22297	0.39204	0.36667
0.16486	0.2241	0.39443	0.36852
0.16495	0.22523	0.39587	0.37037
0.16545	0.22635	0.39864	0.37222
0.16554	0.22748	0.40038	0.37407
0.16557	0.2286	0.40285	0.37593
0.16641	0.22973	0.40308	0.37778
0.16691	0.23086	0.40636	0.37963
0.16892	0.23198	0.40779	0.38148
0.1702	0.23311	0.40906	0.38333
0.17032	0.23423	0.41027	0.38519
0.17142	0.23536	0.41063	0.38704
0.17412	0.23649	0.41282	0.38889
0.17471	0.23761	0.4132	0.39074
0.17595	0.23874	0.41846	0.39259
0.17685	0.23986	0.41877	0.39444
0.17864	0.24099	0.42411	0.3963
0.17945	0.24212	0.42712	0.39815
0.18053	0.24324	0.43128	0.4
0.18077	0.24437	0.43267	0.40185
0.18129	0.2455	0.43286	0.4037
0.18199	0.24662	0.43355	0.40556
0.18532	0.24775	0.43509	0.40741
0.18536	0.24887	0.43972	0.40926
0.18785	0.25	0.44025	0.41111
0.19102	0.25113	0.44077	0.41296
0.19131	0.25225	0.44304	0.41481
0.19193	0.25338	0.44333	0.41667
0.19205	0.2545	0.44386	0.41852
0.19241	0.25563	0.44436	0.42037
0.19247	0.25676	0.44612	0.42222
0.19606	0.25788	0.44674	0.42407
0.19632	0.25901	0.44933	0.42593
0.19816	0.26014	0.44952	0.42778
0.19843	0.26126	0.45035	0.42963
0.19932	0.26239	0.45219	0.43148
0.2	0.26351	0.45263	0.43333
0.20071	0.26464	0.4533	0.43519
0.20514	0.26577	0.45418	0.43704
0.2053	0.26689	0.45643	0.43889
0.20567	0.26802	0.45669	0.44074
0.20617	0.26914	0.4569	0.44259
0.20627	0.27027	0.45706	0.44444
0.20874	0.2714	0.45726	0.4463
0.20974	0.27252	0.45842	0.44815
0.21236	0.27365	0.45933	0.45
0.2129	0.27477	0.46205	0.45185
0.21571	0.2759	0.46277	0.4537
0.21635	0.27703	0.46452	0.45556
0.21803	0.27815	0.46511	0.45741
0.21995	0.27928	0.46529	0.45926
0.22174	0.28041	0.46656	0.46111
0.22247	0.28153	0.4672	0.46296
0.22342	0.28266	0.46767	0.46481
0.22346	0.28378	0.46857	0.46667
0.22476	0.28491	0.46971	0.46852
0.22885	0.28604	0.47048	0.47037
0.23239	0.28716	0.47168	0.47222
0.23311	0.28829	0.47283	0.47407
0.23527	0.28941	0.47355	0.47593
0.23564	0.29054	0.47431	0.47778
0.23828	0.29167	0.47669	0.47963
0.23844	0.29279	0.47826	0.48148
0.23934	0.29392	0.47831	0.48333
0.24067	0.29505	0.47847	0.48519
0.24272	0.29617	0.47876	0.48704
0.24289	0.2973	0.47933	0.48889
0.24418	0.29842	0.47954	0.49074
0.24454	0.29955	0.47998	0.49259
0.24474	0.30068	0.4801	0.49444
0.24813	0.3018	0.482	0.4963
0.25049	0.30293	0.48245	0.49815
0.25148	0.30405	0.48323	0.5
0.25166	0.30518	0.48348	0.50185
0.25358	0.30631	0.48368	0.5037
0.25514	0.30743	0.4843	0.50556
0.2583	0.30856	0.48532	0.50741
0.25896	0.30968	0.48535	0.50926
0.25915	0.31081	0.4855	0.51111
0.26042	0.31194	0.48638	0.51296
0.26078	0.31306	0.48726	0.51481
0.2619	0.31419	0.48909	0.51667
0.26227	0.31532	0.48957	0.51852
0.26344	0.31644	0.49097	0.52037
0.26405	0.31757	0.49221	0.52222
0.26771	0.31869	0.49224	0.52407
0.2693	0.31982	0.49321	0.52593
0.26978	0.32095	0.49449	0.52778
0.27132	0.32207	0.49519	0.52963
0.27275	0.3232	0.49566	0.53148
0.27288	0.32432	0.49595	0.53333
0.27289	0.32545	0.49714	0.53519
0.27361	0.32658	0.50121	0.53704
0.27453	0.3277	0.50193	0.53889
0.27673	0.32883	0.50221	0.54074
0.27989	0.32995	0.50265	0.54259
0.27989	0.33108	0.50293	0.54444
0.28148	0.33221	0.50453	0.5463
0.28465	0.33333	0.50457	0.54815
0.28472	0.33446	0.50706	0.55
0.2857	0.33559	0.50963	0.55185
0.29006	0.33671	0.5101	0.5537
0.29056	0.33784	0.51044	0.55556
0.29063	0.33896	0.51085	0.55741
0.29265	0.34009	0.51194	0.55926
0.29282	0.34122	0.51239	0.56111
0.29357	0.34234	0.51262	0.56296
0.29375	0.34347	0.51307	0.56481
0.29852	0.34459	0.51357	0.56667
0.3074	0.34572	0.51372	0.56852
0.30799	0.34685	0.51406	0.57037
0.31035	0.34797	0.51609	0.57222
0.31339	0.3491	0.51616	0.57407
0.31618	0.35023	0.51648	0.57593
0.31734	0.35135	0.51703	0.57778
0.31792	0.35248	0.51917	0.57963
0.31919	0.3536	0.52151	0.58148
0.32013	0.35473	0.52284	0.58333
0.32216	0.35586	0.52455	0.58519
0.32254	0.35698	0.52475	0.58704
0.32331	0.35811	0.52484	0.58889
0.32597	0.35923	0.52735	0.59074
0.32616	0.36036	0.52811	0.59259
0.33068	0.36149	0.52832	0.59444
0.33233	0.36261	0.52897	0.5963
0.3339	0.36374	0.52963	0.59815
0.33868	0.36486	0.53169	0.6
0.3443	0.36599	0.53247	0.60185
0.3472	0.36712	0.53381	0.6037
0.34744	0.36824	0.53403	0.60556
0.35	0.36937	0.53465	0.60741
0.35329	0.3705	0.53517	0.60926
0.35614	0.37162	0.5361	0.61111
0.3614	0.37275	0.53703	0.61296
0.36175	0.37387	0.53889	0.61481
0.36217	0.375	0.53916	0.61667
0.36879	0.37613	0.53991	0.61852
0.3722	0.37725	0.54301	0.62037
0.37238	0.37838	0.54385	0.62222
0.3753	0.3795	0.54469	0.62407
0.37816	0.38063	0.54559	0.62593
0.37953	0.38176	0.54611	0.62778
0.38384	0.38288	0.54676	0.62963
0.38979	0.38401	0.55006	0.63148
0.39007	0.38514	0.55009	0.63333
0.3946	0.38626	0.55054	0.63519
0.39615	0.38739	0.55137	0.63704
0.39623	0.38851	0.55187	0.63889
0.39933	0.38964	0.55441	0.64074
0.40112	0.39077	0.55571	0.64259
0.40153	0.39189	0.55629	0.64444
0.40184	0.39302	0.55794	0.6463
0.40318	0.39414	0.55893	0.64815
0.40473	0.39527	0.55906	0.65
0.40631	0.3964	0.55977	0.65185
0.40743	0.39752	0.55979	0.6537
0.40893	0.39865	0.56032	0.65556
0.41089	0.39977	0.56117	0.65741
0.41374	0.4009	0.56129	0.65926
0.4146	0.40203	0.56148	0.66111
0.41476	0.40315	0.56179	0.66296
0.4154	0.40428	0.56277	0.66481
0.41557	0.40541	0.563	0.66667
0.41562	0.40653	0.56356	0.66852
0.41834	0.40766	0.56373	0.67037
0.42027	0.40878	0.56374	0.67222
0.42043	0.40991	0.5647	0.67407
0.42449	0.41104	0.56764	0.67593
0.42523	0.41216	0.56886	0.67778
0.42587	0.41329	0.56931	0.67963
0.42689	0.41441	0.5702	0.68148
0.42779	0.41554	0.57175	0.68333
0.42812	0.41667	0.57191	0.68519
0.42895	0.41779	0.57239	0.68704
0.43015	0.41892	0.57413	0.68889
0.43176	0.42005	0.57452	0.69074
0.43232	0.42117	0.57625	0.69259
0.43356	0.4223	0.57707	0.69444
0.4337	0.42342	0.57776	0.6963
0.43382	0.42455	0.57928	0.69815
0.43506	0.42568	0.58021	0.7
0.4365	0.4268	0.58036	0.70185
0.43737	0.42793	0.58063	0.7037
0.43797	0.42905	0.5834	0.70556
0.43822	0.43018	0.58379	0.70741
0.43879	0.43131	0.58419	0.70926
0.44027	0.43243	0.58459	0.71111
0.44089	0.43356	0.58574	0.71296
0.44111	0.43468	0.58604	0.71481
0.44264	0.43581	0.58613	0.71667
0.44316	0.43694	0.5869	0.71852
0.44359	0.43806	0.58705	0.72037
0.44464	0.43919	0.58758	0.72222
0.44523	0.44032	0.58768	0.72407
0.44527	0.44144	0.58839	0.72593
0.44582	0.44257	0.58868	0.72778
0.44638	0.44369	0.58932	0.72963
0.447	0.44482	0.59072	0.73148
0.44714	0.44595	0.59091	0.73333
0.44872	0.44707	0.59125	0.73519
0.44915	0.4482	0.59131	0.73704
0.45079	0.44932	0.59319	0.73889
0.45568	0.45045	0.59446	0.74074
0.45587	0.45158	0.5945	0.74259
0.45739	0.4527	0.59486	0.74444
0.4575	0.45383	0.59507	0.7463
0.45808	0.45495	0.59545	0.74815
0.45823	0.45608	0.59725	0.75
0.45914	0.45721	0.59795	0.75185
0.46049	0.45833	0.59905	0.7537
0.46058	0.45946	0.59954	0.75556
0.46065	0.46059	0.60129	0.75741
0.46219	0.46171	0.60183	0.75926
0.46255	0.46284	0.60188	0.76111
0.46353	0.46396	0.60217	0.76296
0.46366	0.46509	0.60242	0.76481
0.46439	0.46622	0.60387	0.76667
0.46594	0.46734	0.60411	0.76852
0.46715	0.46847	0.60513	0.77037
0.46725	0.46959	0.60568	0.77222
0.46753	0.47072	0.60734	0.77407
0.4677	0.47185	0.60804	0.77593
0.468	0.47297	0.60818	0.77778
0.4687	0.4741	0.6082	0.77963
0.46918	0.47523	0.60828	0.78148
0.46941	0.47635	0.60862	0.78333
0.47033	0.47748	0.60886	0.78519
0.47311	0.4786	0.60923	0.78704
0.47389	0.47973	0.60959	0.78889
0.47479	0.48086	0.61016	0.79074
0.47571	0.48198	0.61121	0.79259
0.47596	0.48311	0.61211	0.79444
0.47616	0.48423	0.61301	0.7963
0.47629	0.48536	0.61315	0.79815
0.47708	0.48649	0.614	0.8
0.47769	0.48761	0.61438	0.80185
0.4777	0.48874	0.61487	0.8037
0.4778	0.48986	0.61528	0.80556
0.47854	0.49099	0.61543	0.80741
0.47871	0.49212	0.61615	0.80926
0.4789	0.49324	0.61692	0.81111
0.47961	0.49437	0.61753	0.81296
0.48079	0.4955	0.61777	0.81481
0.48301	0.49662	0.61939	0.81667
0.48333	0.49775	0.61976	0.81852
0.48341	0.49887	0.62045	0.82037
0.48341	0.5	0.62059	0.82222
0.48357	0.50113	0.62071	0.82407
0.48398	0.50225	0.62284	0.82593
0.4843	0.50338	0.62292	0.82778
0.48507	0.5045	0.6252	0.82963
0.4863	0.50563	0.62531	0.83148
0.48636	0.50676	0.62544	0.83333
0.48704	0.50788	0.62567	0.83519
0.48753	0.50901	0.62597	0.83704
0.48773	0.51014	0.62629	0.83889
0.48775	0.51126	0.62674	0.84074
0.48782	0.51239	0.62791	0.84259
0.48797	0.51351	0.62852	0.84444
0.48846	0.51464	0.63121	0.8463
0.48885	0.51577	0.63127	0.84815
0.48888	0.51689	0.6319	0.85
0.48939	0.51802	0.63222	0.85185
0.48989	0.51914	0.63223	0.8537
0.49096	0.52027	0.6327	0.85556
0.49165	0.5214	0.6337	0.85741
0.49169	0.52252	0.63466	0.85926
0.49233	0.52365	0.63479	0.86111
0.49276	0.52477	0.63489	0.86296
0.49288	0.5259	0.63627	0.86481
0.49299	0.52703	0.63735	0.86667
0.493	0.52815	0.63793	0.86852
0.49339	0.52928	0.63956	0.87037
0.49351	0.53041	0.63959	0.87222
0.49459	0.53153	0.63966	0.87407
0.49469	0.53266	0.63998	0.87593
0.49568	0.53378	0.64041	0.87778
0.4962	0.53491	0.64273	0.87963
0.49654	0.53604	0.64285	0.88148
0.49688	0.53716	0.64288	0.88333
0.49706	0.53829	0.64318	0.88519
0.49768	0.53941	0.64355	0.88704
0.49819	0.54054	0.64368	0.88889
0.49889	0.54167	0.64397	0.89074
0.49907	0.54279	0.64439	0.89259
0.49924	0.54392	0.64787	0.89444
0.49995	0.54505	0.64819	0.8963
0.50047	0.54617	0.64958	0.89815
0.50087	0.5473	0.6496	0.9
0.50109	0.54842	0.65046	0.90185
0.50159	0.54955	0.65061	0.9037
0.50288	0.55068	0.65104	0.90556
0.50291	0.5518	0.65122	0.90741
0.50321	0.55293	0.65149	0.90926
0.50325	0.55405	0.65322	0.91111
0.50402	0.55518	0.65381	0.91296
0.50444	0.55631	0.65416	0.91481
0.50446	0.55743	0.65558	0.91667
0.50517	0.55856	0.6557	0.91852
0.50629	0.55968	0.6558	0.92037
0.50637	0.56081	0.65611	0.92222
0.5079	0.56194	0.65647	0.92407
0.50827	0.56306	0.65715	0.92593
0.50875	0.56419	0.6584	0.92778
0.50883	0.56532	0.66071	0.92963
0.50905	0.56644	0.66335	0.93148
0.50928	0.56757	0.66887	0.93333
0.51058	0.56869	0.6694	0.93519
0.51147	0.56982	0.6698	0.93704
0.51165	0.57095	0.67273	0.93889
0.51168	0.57207	0.67385	0.94074
0.51268	0.5732	0.67399	0.94259
0.51358	0.57432	0.67642	0.94444
0.51414	0.57545	0.67646	0.9463
0.51428	0.57658	0.67826	0.94815
0.51553	0.5777	0.67849	0.95
0.51614	0.57883	0.67904	0.95185
0.51615	0.57995	0.67921	0.9537
0.51628	0.58108	0.6794	0.95556
0.51665	0.58221	0.68045	0.95741
0.51693	0.58333	0.68202	0.95926
0.51702	0.58446	0.68519	0.96111
0.51792	0.58559	0.6852	0.96296
0.51862	0.58671	0.68699	0.96481
0.51907	0.58784	0.68886	0.96667
0.52034	0.58896	0.69176	0.96852
0.52067	0.59009	0.69535	0.97037
0.52102	0.59122	0.69582	0.97222
0.52138	0.59234	0.69664	0.97407
0.52243	0.59347	0.7011	0.97593
0.52246	0.59459	0.70295	0.97778
0.52375	0.59572	0.7151	0.97963
0.52431	0.59685	0.71554	0.98148
0.52465	0.59797	0.72359	0.98333
0.5247	0.5991	0.72432	0.98519
0.52494	0.60023	0.72644	0.98704
0.52508	0.60135	0.73339	0.98889
0.52523	0.60248	0.73491	0.99074
0.52621	0.6036	0.74041	0.99259
0.5266	0.60473	0.75016	0.99444
0.52716	0.60586	0.75203	0.9963
0.52716	0.60698	0.75925	0.99815
0.52764	0.60811	0.823	1
0.52776	0.60923
0.52901	0.61036
0.52917	0.61149
0.52946	0.61261
0.52959	0.61374
0.53004	0.61486
0.53038	0.61599
0.53131	0.61712
0.53151	0.61824
0.53249	0.61937
0.53347	0.6205
0.53349	0.62162
0.53396	0.62275
0.53515	0.62387
0.53528	0.625
0.5353	0.62613
0.53658	0.62725
0.53663	0.62838
0.5369	0.6295
0.53775	0.63063
0.53835	0.63176
0.53854	0.63288
0.5386	0.63401
0.53864	0.63514
0.53935	0.63626
0.53979	0.63739
0.54016	0.63851
0.5403	0.63964
0.54071	0.64077
0.54107	0.64189
0.54181	0.64302
0.54186	0.64414
0.54197	0.64527
0.54213	0.6464
0.54247	0.64752
0.54272	0.64865
0.54326	0.64977
0.54378	0.6509
0.54379	0.65203
0.54488	0.65315
0.54488	0.65428
0.54496	0.65541
0.54521	0.65653
0.54719	0.65766
0.54799	0.65878
0.54923	0.65991
0.54953	0.66104
0.54972	0.66216
0.55036	0.66329
0.55097	0.66441
0.55128	0.66554
0.55226	0.66667
0.55244	0.66779
0.55259	0.66892
0.55306	0.67005
0.55361	0.67117
0.55397	0.6723
0.5544	0.67342
0.5547	0.67455
0.55743	0.67568
0.55892	0.6768
0.55892	0.67793
0.56018	0.67905
0.56075	0.68018
0.56104	0.68131
0.56223	0.68243
0.5634	0.68356
0.56417	0.68468
0.56434	0.68581
0.56476	0.68694
0.56519	0.68806
0.56581	0.68919
0.56766	0.69032
0.56917	0.69144
0.56927	0.69257
0.56998	0.69369
0.57023	0.69482
0.57034	0.69595
0.57118	0.69707
0.57175	0.6982
0.57206	0.69932
0.57231	0.70045
0.57309	0.70158
0.57313	0.7027
0.57484	0.70383
0.57504	0.70495
0.57509	0.70608
0.57525	0.70721
0.57676	0.70833
0.57682	0.70946
0.57835	0.71059
0.57869	0.71171
0.57959	0.71284
0.58002	0.71396
0.5801	0.71509
0.58049	0.71622
0.58118	0.71734
0.5817	0.71847
0.58188	0.71959
0.58217	0.72072
0.58246	0.72185
0.58315	0.72297
0.58359	0.7241
0.58372	0.72523
0.58374	0.72635
0.58425	0.72748
0.5845	0.7286
0.58468	0.72973
0.58526	0.73086
0.58541	0.73198
0.58608	0.73311
0.58736	0.73423
0.58772	0.73536
0.58804	0.73649
0.58834	0.73761
0.58835	0.73874
0.58854	0.73986
0.58886	0.74099
0.58917	0.74212
0.58948	0.74324
0.58995	0.74437
0.59004	0.7455
0.59118	0.74662
0.59202	0.74775
0.59232	0.74887
0.59279	0.75
0.593	0.75113
0.593	0.75225
0.59445	0.75338
0.59488	0.7545
0.59574	0.75563
0.59593	0.75676
0.59614	0.75788
0.5974	0.75901
0.59771	0.76014
0.59877	0.76126
0.59884	0.76239
0.59903	0.76351
0.59903	0.76464
0.59928	0.76577
0.59947	0.76689
0.59998	0.76802
0.60012	0.76914
0.60027	0.77027
0.60175	0.7714
0.60205	0.77252
0.60212	0.77365
0.60274	0.77477
0.60332	0.7759
0.60374	0.77703
0.60429	0.77815
0.60456	0.77928
0.60507	0.78041
0.60519	0.78153
0.60575	0.78266
0.60605	0.78378
0.60628	0.78491
0.60634	0.78604
0.60668	0.78716
0.60693	0.78829
0.60745	0.78941
0.60809	0.79054
0.6086	0.79167
0.60926	0.79279
0.6093	0.79392
0.60984	0.79505
0.61025	0.79617
0.61142	0.7973
0.61211	0.79842
0.61217	0.79955
0.61234	0.80068
0.61241	0.8018
0.61302	0.80293
0.6133	0.80405
0.61363	0.80518
0.61396	0.80631
0.61398	0.80743
0.61571	0.80856
0.61585	0.80968
0.61626	0.81081
0.61645	0.81194
0.61692	0.81306
0.61716	0.81419
0.61736	0.81532
0.61794	0.81644
0.6183	0.81757
0.61866	0.81869
0.61922	0.81982
0.61928	0.82095
0.61954	0.82207
0.62041	0.8232
0.62071	0.82432
0.62098	0.82545
0.62106	0.82658
0.62121	0.8277
0.6215	0.82883
0.62166	0.82995
0.62222	0.83108
0.62229	0.83221
0.62269	0.83333
0.62279	0.83446
0.62337	0.83559
0.62343	0.83671
0.62391	0.83784
0.62392	0.83896
0.62435	0.84009
0.62456	0.84122
0.62466	0.84234
0.62549	0.84347
0.62653	0.84459
0.62665	0.84572
0.62671	0.84685
0.62684	0.84797
0.62697	0.8491
0.62706	0.85023
0.62818	0.85135
0.62882	0.85248
0.62931	0.8536
0.62961	0.85473
0.62964	0.85586
0.62987	0.85698
0.63041	0.85811
0.63088	0.85923
0.63113	0.86036
0.63128	0.86149
0.63134	0.86261
0.6331	0.86374
0.63361	0.86486
0.63363	0.86599
0.634	0.86712
0.6349	0.86824
0.63518	0.86937
0.63534	0.8705
0.63546	0.87162
0.63559	0.87275
0.63572	0.87387
0.63585	0.875
0.63672	0.87613
0.63716	0.87725
0.63762	0.87838
0.63806	0.8795
0.63889	0.88063
0.63957	0.88176
0.63974	0.88288
0.63992	0.88401
0.64268	0.88514
0.64338	0.88626
0.64339	0.88739
0.64396	0.88851
0.64526	0.88964
0.64642	0.89077
0.64705	0.89189
0.64716	0.89302
0.64773	0.89414
0.64842	0.89527
0.64875	0.8964
0.64903	0.89752
0.64905	0.89865
0.64908	0.89977
0.64922	0.9009
0.64923	0.90203
0.64957	0.90315
0.64978	0.90428
0.64987	0.90541
0.64997	0.90653
0.65065	0.90766
0.65116	0.90878
0.65156	0.90991
0.65215	0.91104
0.65217	0.91216
0.65222	0.91329
0.65294	0.91441
0.65316	0.91554
0.65329	0.91667
0.65415	0.91779
0.65475	0.91892
0.65504	0.92005
0.65551	0.92117
0.65578	0.9223
0.65582	0.92342
0.65656	0.92455
0.65759	0.92568
0.65856	0.9268
0.65934	0.92793
0.65973	0.92905
0.66015	0.93018
0.66067	0.93131
0.66105	0.93243
0.66312	0.93356
0.6642	0.93468
0.66459	0.93581
0.66554	0.93694
0.6658	0.93806
0.66827	0.93919
0.66854	0.94032
0.66915	0.94144
0.67041	0.94257
0.67063	0.94369
0.67071	0.94482
0.67114	0.94595
0.67154	0.94707
0.67167	0.9482
0.67294	0.94932
0.67342	0.95045
0.67374	0.95158
0.67465	0.9527
0.67489	0.95383
0.67574	0.95495
0.67621	0.95608
0.67806	0.95721
0.67924	0.95833
0.67935	0.95946
0.68049	0.96059
0.68111	0.96171
0.68202	0.96284
0.68207	0.96396
0.68278	0.96509
0.6845	0.96622
0.68463	0.96734
0.68505	0.96847
0.68516	0.96959
0.68787	0.97072
0.68812	0.97185
0.69412	0.97297
0.69412	0.9741
0.69469	0.97523
0.69589	0.97635
0.6962	0.97748
0.69709	0.9786
0.69742	0.97973
0.69771	0.98086
0.70098	0.98198
0.70215	0.98311
0.7024	0.98423
0.70272	0.98536
0.70385	0.98649
0.70737	0.98761
0.7076	0.98874
0.70796	0.98986
0.71229	0.99099
0.71993	0.99212
0.72473	0.99324
0.73063	0.99437
0.74014	0.9955
0.76403	0.99662
0.76861	0.99775
0.76984	0.99887
0.81994	1

## Sheet: Fig.7f
	WT		Trim9null-Elongating		Trim9null-Stalled		Trim9null-Retracting
Time (hAPF)	Depth (um)	Std (um)	Depth (um)	Std (um)	Depth (um)	Std (um)	Depth (um)	Std (um)
42.96	0.60795	1.5737	0.92998	0.99142	0.58396	0.84762	1.148	1.9706
43.12	1.0656	2.1535	1.2854	1.5119	1.1179	1.5284	1.1852	1.9501
43.29	1.2434	2.2644	1.2641	1.2345	1.7079	3.6296	1.2535	1.976
43.46	1.3331	2.1556	1.5998	1.5451	1.3462	3.0024	1.5056	2.4625
43.62	2.3941	2.8131	1.7125	1.9551	1.2228	1.1481	1.646	2.6149
43.79	2.898	2.9128	1.9958	2.418	1.095	1.734	1.8849	2.6899
43.96	4.322	3.503	2.8934	2.4811	2.03	2.1395	1.863	2.7755
44.12	4.2822	3.573	2.0846	1.9799	2.4968	2.9198	2.1052	2.8047
44.29	4.4495	3.5482	2.3716	2.4203	2.2789	2.8973	2.9642	3.0453
44.46	5.0498	3.3337	2.9308	2.4845	2.8854	3.2007	2.9641	3.0052
44.62	5.043	3.6417	3.3999	2.3171	2.8982	2.8783	3.8032	2.7352
44.79	5.3303	3.9509	3.7495	2.4322	2.9196	3.173	4.0227	3.1962
44.96	5.432	3.6836	4.5355	2.3254	3.2098	3.3737	3.3963	2.9062
45.12	5.8506	3.6146	4.7778	2.5745	3.5883	2.8046	3.7446	2.8464
45.29	6.4738	3.681	5.0345	2.91	3.8996	3.9064	5.378	3.9791
45.46	7.045	3.7508	5.4148	2.9861	2.4649	2.6914	5.1873	3.2365
45.62	7.5117	3.7005	6.024	2.8324	3.2893	3.0146	4.565	3.4913
45.79	7.5771	3.4941	5.9406	2.7611	3.7308	2.6146	4.5079	3.5016
45.96	8.6758	3.1546	5.7465	3.0414	4.5127	3.1869	4.6241	3.7798
46.12	8.2239	3.1337	6.5691	2.1693	5.7797	2.6808	5.8358	3.4251
46.29	8.6235	3.0519	7.3894	1.8759	6.0837	2.2066	5.1726	3.5182
46.46	8.8834	3.0581	7.4819	2.3452	5.5992	2.5266	6.2453	3.3035
46.62	8.9335	2.9298	7.7076	2.0435	5.9169	2.9562	7.7392	2.8909
46.79	9.5459	2.9785	8.5528	1.66	6.614	2.5355	7.7489	2.8017
46.96	9.6968	2.6709	8.4406	2.1148	6.4632	3.1057	7.8248	2.3161
47.12	10.316	2.7019	8.5786	2.1382	6.4461	2.7616	7.4743	2.9558
47.29	10.273	2.3679	8.7172	2.5263	6.9645	4.2742	7.3997	3.2077
47.46	10.559	2.279	8.5783	1.6963	7.5828	2.7938	8.02	3.1824
47.62	10.673	2.333	9.3311	2.0019	8.2287	2.4679	7.8913	2.8042
47.79	10.798	2.4099	9.5796	1.7556	8.4201	2.817	8.6121	2.5732
47.96	10.687	2.2556	9.6235	1.8247	9.2161	2.1297	8.9061	1.7501
48.12	10.875	2.1943	9.6391	1.7354	9.734	1.9271	8.9643	1.5756
48.29	11.213	2.3777	9.5957	1.3776	9.4588	2.0189	8.5119	2.5001
48.46	11.343	1.9134	10.134	1.7039	10.101	1.7461	8.9885	1.5323
48.62	11.638	1.6794	10.834	1.9525	9.964	1.6511	9.3618	1.8534
48.79	11.81	2.0079	10.159	1.6508	9.9548	1.6733	9.5671	2.4666
48.96	11.988	1.8996	10.378	2.0188	10.137	1.9888	9.5476	2.7003
49.12	12.241	1.6872	10.547	1.5255	10.296	2.0981	9.743	1.7693
49.29	12.225	1.8165	11.235	1.7018	11.049	1.9684	10.072	1.7798
49.46	12.202	1.7675	11.414	1.7655	10.616	1.675	10.191	1.5181
49.62	12.406	1.6259	11.265	1.7311	10.915	2.0982	10.185	1.7309
49.79	12.306	1.5664	11.31	1.5156	10.249	2.2424	10.562	1.6737
49.96	12.377	1.6645	11.138	1.731	10.324	2.1	10.204	2.0701
50.12	12.604	1.7045	11.385	1.9566	11.112	2.181	10.523	1.5745
50.29	12.559	1.5138	11.602	1.9155	11.022	1.594	10.789	1.4767
50.46	12.966	1.6235	11.445	1.7312	11.144	1.6074	10.147	2.9037
50.62	12.578	1.5599	11.778	2.0877	11.039	1.5415	10.565	1.8803
50.79	12.72	1.7935	12.021	2.2549	11.211	1.9942	10.218	2.1868
50.96	12.813	1.5968	11.736	1.7269	11.41	1.8106	10.304	2.4667
51.12	12.992	1.8032	11.739	1.346	11.503	2.0297	10.04	2.7496
51.29	13.013	1.6931	11.972	1.2379	11.562	1.8792	10.593	2.0929
51.46	13.04	1.7275	11.883	1.2739	11.196	2.0324	10.671	1.942
51.62	13.218	1.7423	12.026	1.2732	11.357	2.1683	10.778	1.9843
51.79	13.172	1.6491	12.003	1.4238	11.208	1.7965	10.699	1.7653
51.96	13.205	1.6435	12.184	1.8316	11.134	1.6891	10.916	1.9283
52.12	13.095	1.6483	12.426	1.6781	11.266	1.7702	11.092	1.5634
52.29	13.389	1.6677	12.432	1.3827	11.476	1.7551	12.024	1.4327
52.46	13.275	1.6158	12.682	1.6481	11.81	2.1315	11.527	1.6575
52.62	13.228	1.4287	12.246	1.4428	12.194	2.674	11.359	1.6936
52.79	13.213	1.4738	12.535	1.5165	11.719	1.8982	11.312	1.5151
52.96	13.345	1.4929	12.535	1.3821	11.594	2.0524	11.493	1.7048
53.12	13.338	1.5474	12.671	1.5264	12.038	2.1228	11.712	1.622
53.29	13.588	1.5155	12.748	1.8282	11.898	2.0988	10.977	2.3321
53.46	13.509	1.5852	12.702	1.6711	12.071	2.1431	10.971	2.8183
53.62	13.576	1.691	12.697	1.9441	12	2.2979	11.349	1.8816
53.79	13.677	1.563	12.573	1.9287	11.813	2.351	11.563	1.8175
53.96	13.573	1.618	12.788	1.3184	11.87	2.03	11.568	2.1793
54.12	13.902	1.6661	12.534	1.5164	11.824	2.1476	11.203	2.0979
54.29	13.875	1.6362	12.937	1.8313	11.87	1.7857	11.366	2.3898
54.46	13.94	1.6826	12.872	1.7155	11.732	2.0819	11.275	2.4228
54.62	14	1.7152	12.643	1.4713	11.806	2.1983	11.282	2.5033
54.79	13.962	1.5988	12.693	1.5538	11.711	2.2768	11.117	2.5296
54.96	14.068	1.7083	12.812	1.4683	11.735	1.9608	11.1	3.2175
55.12	14.001	1.8052	12.916	1.4356	11.596	2.199	11.103	3.1792
55.29	14.049	1.5622	12.95	1.6842	11.891	1.8844	10.957	3.1344
55.46	13.886	1.5828	13.146	1.4333	11.775	2.0558	10.905	2.6221
55.62	14.088	1.7119	13.145	1.7086	11.578	1.8982	10.714	3.0996
55.79	14.187	1.8125	13.312	1.8426	11.58	2.141	10.792	3.2419
55.96	14.319	1.8045	13.065	1.849	11.447	1.9393	10.458	3.2313
56.12	14.348	1.692	12.925	1.6828	11.441	2.0973	10.454	3.1818
56.29	14.347	1.772	13.17	1.4895	11.507	1.782	9.9142	3.5347
56.46	14.244	1.763	13.221	1.5195	11.309	1.7217	10.493	3.4312
56.62	14.502	1.8815	13.096	1.7284	11.112	2.1198	10.169	3.6753
56.79	14.478	1.8802	12.867	1.8649	11.27	1.8027	10.439	3.6344
56.96	14.672	2.0135	13.07	1.6737	11.103	1.8182	10.285	3.9176
57.12	14.696	1.8919	13.093	1.6662	11.405	1.8277	10.554	3.7861
57.29	14.58	1.9578	13.162	1.618	11.43	1.8347	10.615	3.5487
57.46	14.626	1.9701	13.057	1.8082	11.279	1.8528	10.554	3.7584
57.62	14.684	1.9342	13.361	1.6471	11.111	1.7797	9.952	3.4723
57.79	14.918	2.0131	13.355	1.6238	11.39	2.0475	10.38	3.3518
57.96	15.147	2.2411	13.235	1.5341	11.441	1.8921	10.461	3.2484
58.12	14.966	2.1545	13.402	1.45	11.197	1.7829	9.8707	3.1655
58.29	15.062	2.0335	13.439	1.548	11.757	1.8889	9.8747	3.3206
58.46	15.102	2.0434	13.432	1.4947	11.464	1.7597	9.7441	3.0501
58.62	15.331	2.0546	13.653	1.8753	11.253	2.0058	9.842	3.4069
58.79	15.4	2.2153	13.356	1.664	11.339	1.8093	9.1063	3.9493
58.96	15.228	1.987	13.808	1.7787	11.19	1.9439	8.943	4.2151
59.12	15.376	2.1362	13.603	1.5289	10.992	1.6871	8.9172	4.3411
59.29	15.457	2.3881	13.528	1.4408	11.611	1.9348	9.2309	4.3587
59.46	15.508	2.3351	13.703	1.5057	11.805	1.9354	9.0795	4.1433
59.62	15.763	2.4301	13.753	1.3571	11.678	1.7268	8.9128	4.5404
59.79	15.643	2.27	13.717	1.5246	11.428	1.8633	8.9748	4.4303
59.96	15.78	2.341	13.6	1.616	11.222	1.8016	9.2243	4.1333
60.12	15.692	2.2628	13.669	1.5012	11.681	2.169	8.8867	3.7541
60.29	15.566	2.1297	13.71	1.5125	11.368	1.9344	8.888	4.1044
60.46	15.6	2.151	13.749	1.4975	11.227	1.9633	8.6856	4.0771
60.62	15.736	2.0243	13.807	1.4143	11.29	1.9884	9.1038	4.1138
60.79	14.812	1.8769	13.937	1.5346	10.606	1.9914	7.9777	5.1665
60.96	15.011	1.8406	14.022	1.6163	11.214	1.9186	7.9086	4.5177
61.12	15.202	1.8224	13.722	1.5516	10.835	1.4724	7.9547	4.943
61.29	15.365	1.8758	13.865	1.5152	11.491	1.5155	7.8765	4.9443
61.46	15.303	1.7931	13.731	1.6101	11.001	1.3507	7.8487	5.1266
61.62	15.301	1.9758	13.708	1.5736	11.2	2.197	7.2961	5.0513
61.79	15.366	1.8874	13.569	1.6004	11.373	2.2443	7.1692	4.4907
61.96	15.249	1.9163	14.147	1.5235	11.008	1.9335	6.9594	4.6966
62.12	15.409	1.868	14.199	1.2656	10.839	1.5937	7.6376	4.8298
62.29	15.237	1.6423	13.967	1.5325	11.339	1.8991	7.6712	5.3459
62.46	15.555	1.8652	14.086	1.3633	11.215	2.2625	7.4194	4.2759
62.62	15.642	1.9547	14.006	1.3496	11.094	2.2004	7.8362	3.6493
62.79	15.716	1.972	14.123	1.2551	11.286	2.0474	6.4668	4.6339
62.96	15.816	1.9264	14.3	1.338	11.341	1.7022	6.7957	4.3865
63.12	15.591	1.7628	13.981	1.5753	11.368	1.7222	6.5931	4.5111
63.29	15.61	1.9294	13.989	1.3956	11.396	1.6236	6.3107	4.5501
63.46	15.627	2.067	14.006	1.4786	11.211	1.7499	6.0536	4.4824
63.62	15.697	2.0675	14.356	1.558	11.549	1.7662	6.1969	4.5905
63.79	15.752	2.1322	14.113	1.8958	10.878	1.6418	5.6636	4.0743
63.96	15.685	2.1256	14.041	1.5028	11.207	1.6449	5.8485	3.9821
64.12	16.003	1.8448	14.226	1.422	11.623	1.6619	5.5561	3.9974
64.29	15.998	1.975	14.24	1.5308	11.269	1.5508	5.3816	3.621
64.46	16.079	2.2198	14.609	1.6385	11.341	2.0344	4.9469	3.5703
64.62	16.158	1.99	14.695	1.6169	11.207	1.8834	5.2436	4.4685
64.79	16.385	2.0024	14.399	1.3847	11.39	1.6352	5.5	4.3051
