# Supplementary figures and images for: Frazzled promotes growth cone attachment at the source of a Netrin gradient in the Drosophila visual system
Source: eLife journal article supplement (doi:10.7554/elife.20762), 2016-10-15

Figure 1  
Figure supplement 1

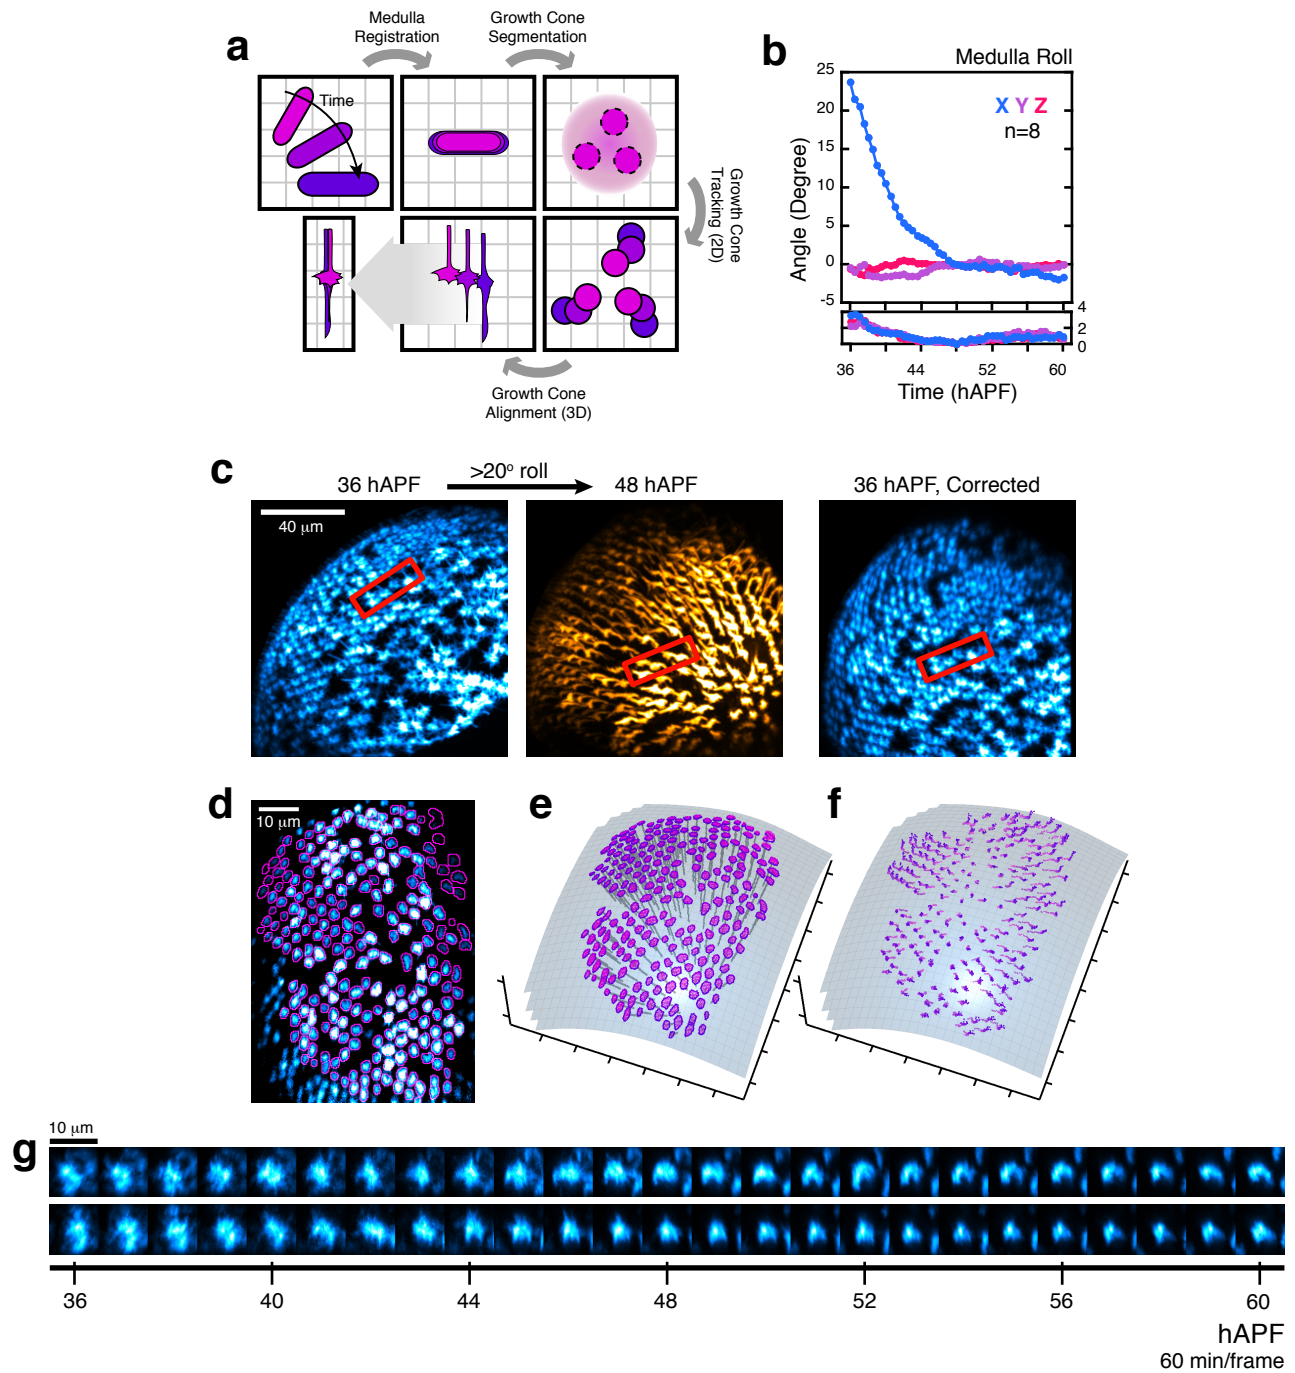

Supplement: supp [file elife_poa_e20762_Figure_1_figure_supplement_1.pdf › elife_poa_e20762_Figure_1_figure_supplement_1.pdf]

Figure 3  
Figure supplement 1

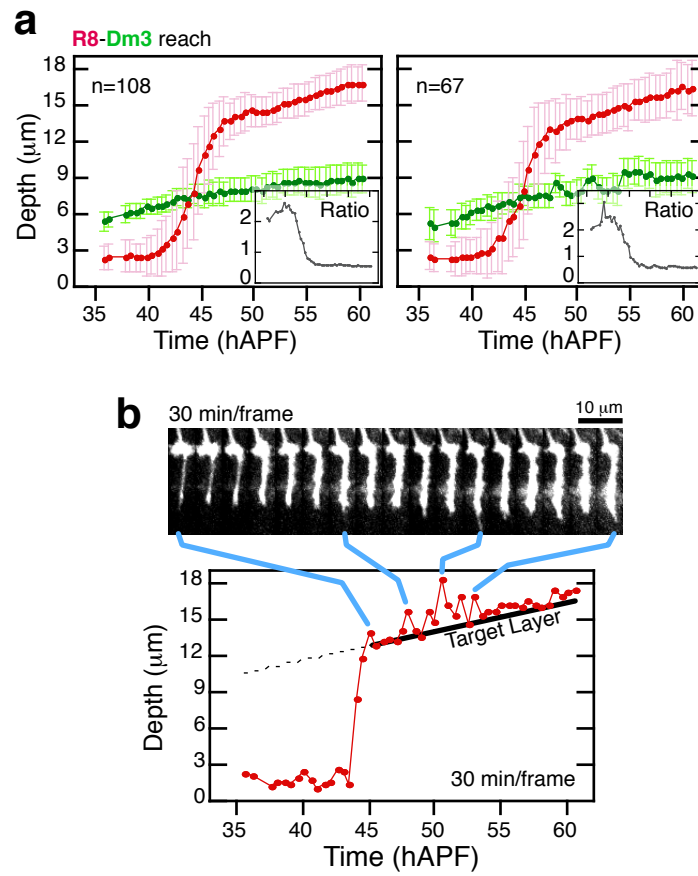

Supplement: supp [file elife_poa_e20762_Figure_3_figure_supplement_1.pdf › elife_poa_e20762_Figure_3_figure_supplement_1.pdf]

Figure 5  
Figure supplement 1

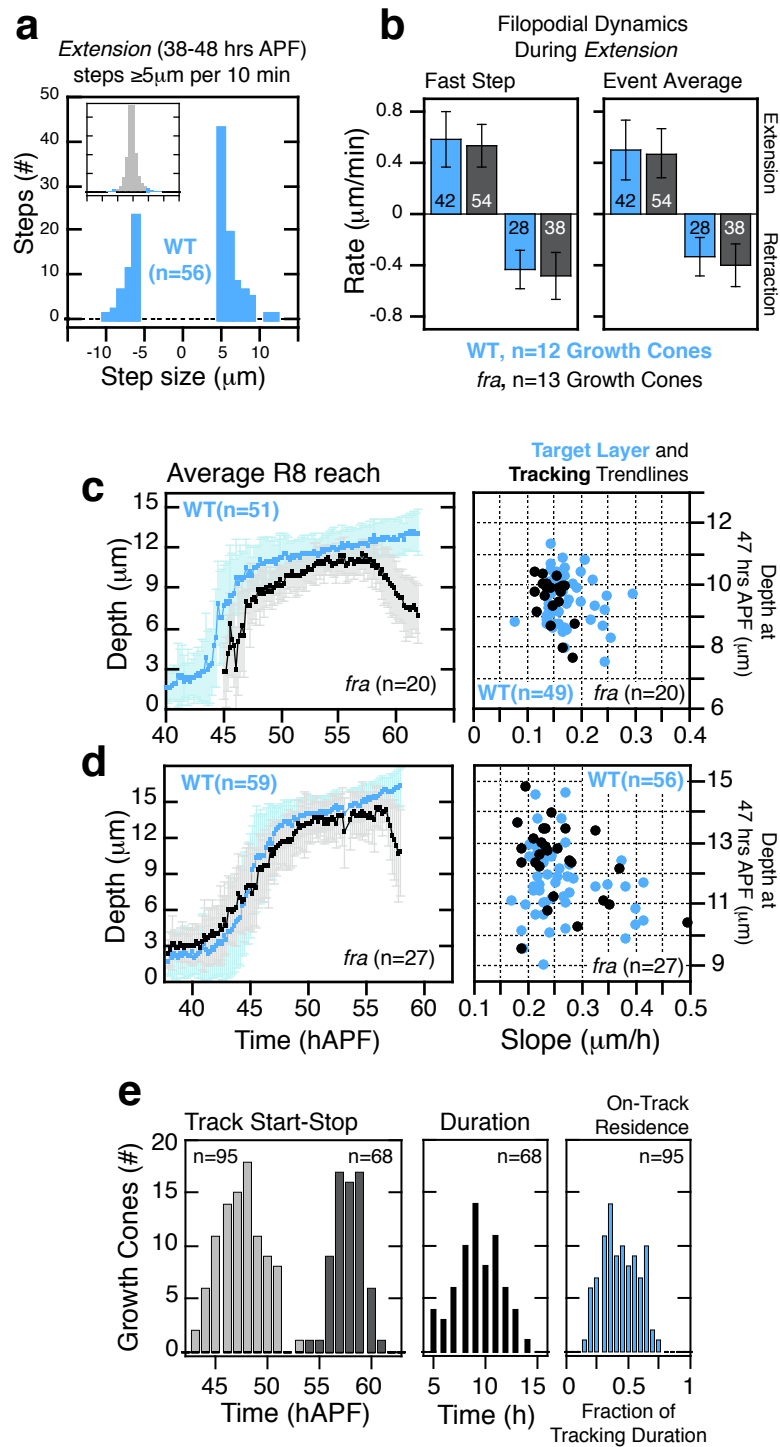

Supplement: supp [file elife_poa_e20762_Figure_5_figure_supplement_1.pdf › elife_poa_e20762_Figure_5_figure_supplement_1.pdf]

Figure 5  
Figure supplement 2

Single *fra*<sup>null</sup> growth cones during *Tracking*

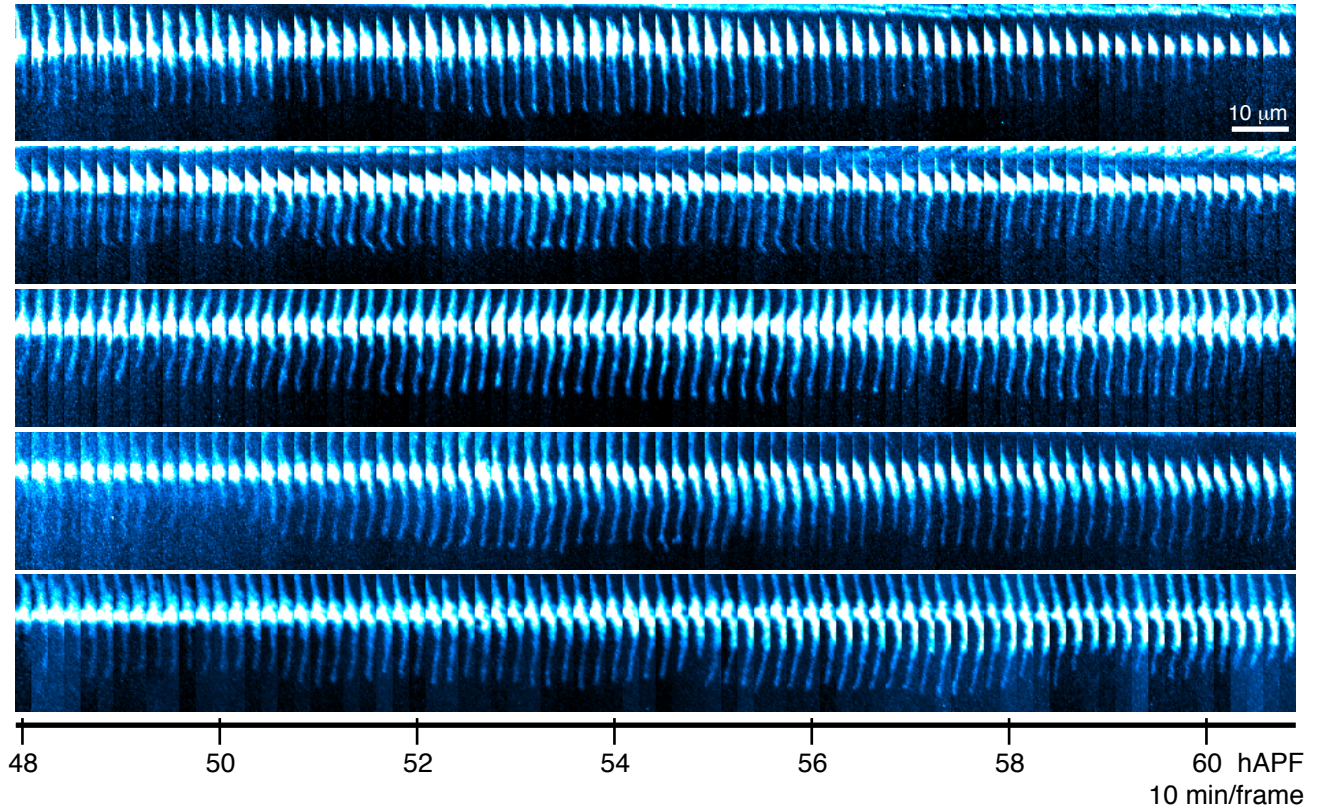

Supplement: supp [file elife_poa_e20762_Figure_5_figure_supplement_2.pdf › elife_poa_e20762_Figure_5_figure_supplement_2.pdf]
